# Supplementary material
Source: Royal Society of Chemistry journal article supplement (doi:10.1039/d6an00153j)
Supplement: d6an00153j1.pdf [file d6an00153j1.pdf]

## SUPPLEMENTARY INFORMATION

### Flavourings, nicotine content, and elemental composition as indicators of regulatory compliance in nicotine pouches and heated tobacco products

Matjaž Rantaša<sup>1</sup>, Matjaž Finšgar<sup>1,\*</sup>

<sup>1</sup>University of Maribor, Faculty of Chemistry and Chemical Engineering, Smetanova ulica 17, 2000 Maribor, Slovenia

Table S1: Nicotine pouches (NPs) sample designations and their brand (reported as NP-X and B-X, respectively, where X represents the sample or brand number), reported nicotine content, reported mass of NPs, and reported compounds.

| Sample designation (Brand) | Reported nicotine content [mg/NP] | Reported mass of NP [g] | Reported compounds on the labelling                                                                                               |
|----------------------------|-----------------------------------|-------------------------|-----------------------------------------------------------------------------------------------------------------------------------|
| NP-1 (B-1)                 | 16.4                              | 1                       | Salt, cellulose, xanthan gum, water, NaHCO <sub>3</sub> , natural aromatic oils, propylene glycol (PG)                            |
| NP-2 (B-1)                 | 12.3                              | 0.75                    | Salt, cellulose, xanthan gum, water, NaHCO <sub>3</sub> , natural aromatic oils, (PG)                                             |
| NP-3 (B-1)                 | 12.3                              | 0.75                    | Salt, cellulose, xanthan gum, water, NaHCO <sub>3</sub> , natural aromatic oils, (PG)                                             |
| NP-4 (B-1)                 | 12.3                              | 0.75                    | Salt, cellulose, xanthan gum, water, NaHCO <sub>3</sub> , natural aromatic oils, (PG)                                             |
| NP-5 (B-2)                 | 4                                 | 0.42                    | Cellulose, water, NaCl, aromas, xylitol, nicotine, PG, sucralose, NaHCO <sub>3</sub>                                              |
| NP-6 (B-2)                 | 4                                 | 0.42                    | Cellulose, water, NaCl, aromas, xylitol, nicotine, PG, sucralose, NaHCO <sub>3</sub>                                              |
| NP-7 (B-2)                 | 6                                 | 0.42                    | Cellulose, water, NaCl, aromas, xylitol, nicotine, PG, sucralose, NaHCO <sub>3</sub>                                              |
| NP-8 (B-2)                 | 10                                | 0.7                     | Cellulose, water, NaCl, aromas, xylitol, nicotine, sodium alginate, sucralose, NaHCO <sub>3</sub>                                 |
| NP-9 (B-2)                 | 8                                 | 0.7                     | Cellulose, water, NaCl, aromas, xylitol, nicotine, sodium alginate, sucralose, NaHCO <sub>3</sub>                                 |
| NP-10 (B-2)                | 10.9                              | 0.7                     | Cellulose, water, NaCl, aromas, xylitol, nicotine, sodium alginate, NH <sub>4</sub> Cl, NaHCO <sub>3</sub> , acesulfame potassium |
| NP-11 (B-2)                | 10                                | 0.7                     | Cellulose, water, NaCl, aromas, xylitol, nicotine, sodium alginate, sucralose, NaHCO <sub>3</sub>                                 |
| NP-12 (B-2)                | 14                                | 0.7                     | Cellulose, water, nicotine polacrilex, NaCl, aromas, xylitol, nicotine, NaOH, sucralose, NaHCO <sub>3</sub>                       |

\* Corresponding author

Address: University of Maribor, Faculty of Chemistry and Chemical Engineering, Smetanova ulica 17, 2000 Maribor, Slovenia

e-mail: matjaz.finsgar@um.si; phone: +386 2 2294 447

|                        |      |      |                                                                                                                                                                                |
|------------------------|------|------|--------------------------------------------------------------------------------------------------------------------------------------------------------------------------------|
| <b>NP-13<br/>(B-2)</b> | 17   | 0.7  | Cellulose, water, nicotine polacrilex, NaCl, aromas, xylitol, nicotine, NaOH, sucralose, NH <sub>4</sub> Cl, NaHCO <sub>3</sub> , acesulfame potassium                         |
| <b>NP-14<br/>(B-2)</b> | 14   | 0.7  | Cellulose, water, nicotine polacrilex, NaCl, aromas, xylitol, nicotine, NaOH, sucralose, NH <sub>4</sub> Cl, NaHCO <sub>3</sub> , acesulfame potassium                         |
| <b>NP-15<br/>(B-3)</b> | 9    | 0.7  | Cellulose, water, plant fibers, glycerol (GLY), NaCl, nicotine, aromas, tartaric acid, Na <sub>2</sub> CO <sub>3</sub> , CaCl <sub>2</sub> , acesulfame potassium              |
| <b>NP-16<br/>(B-3)</b> | 11   | 0.7  | Cellulose, water, GLY, PG, NaCl, nicotine, aromas, tartaric acid, Na <sub>2</sub> CO <sub>3</sub> , CaCl <sub>2</sub> , acesulfame potassium                                   |
| <b>NP-17<br/>(B-3)</b> | 11   | 0.7  | Cellulose, water, GLY, PG, NaCl, nicotine, aromas, tartaric acid, Na <sub>2</sub> CO <sub>3</sub> , CaCl <sub>2</sub> , acesulfame potassium, ethanol                          |
| <b>NP-18<br/>(B-3)</b> | 11   | 0.7  | Cellulose, water, GLY, PG, NaCl, nicotine, aromas, tartaric acid, Na <sub>2</sub> CO <sub>3</sub> , CaCl <sub>2</sub> , acesulfame potassium, ethanol                          |
| <b>NP-19<br/>(B-4)</b> | 8.25 | 0.5  | Cellulose, water, K <sub>2</sub> CO <sub>3</sub> , PG, aromas, nicotine, food preservative                                                                                     |
| <b>NP-20<br/>(B-4)</b> | 8.25 | 0.5  | Cellulose, water, K <sub>2</sub> CO <sub>3</sub> , PG, aromas, nicotine, food preservative                                                                                     |
| <b>NP-21<br/>(B-4)</b> | 13.2 | 0.8  | Cellulose, water, K <sub>2</sub> CO <sub>3</sub> , PG, aromas, nicotine, food preservative                                                                                     |
| <b>NP-22<br/>(B-4)</b> | 8.25 | 0.5  | Cellulose, water, K <sub>2</sub> CO <sub>3</sub> , PG, aromas, nicotine, food preservative                                                                                     |
| <b>NP-23<br/>(B-5)</b> | 12   | 0.8  | Cellulose, water, plant fibers, GLY, PG, NaCl, nicotine, aromas, tartaric acid, Na <sub>2</sub> CO <sub>3</sub> , CaCl <sub>2</sub> , acesulfame potassium, ethanol            |
| <b>NP-24<br/>(B-5)</b> | 12   | 0.8  | Cellulose, water, plant fibers, GLY, PG, NaCl, nicotine, aromas, tartaric acid, Na <sub>2</sub> CO <sub>3</sub> , CaCl <sub>2</sub> , acesulfame potassium, ethanol            |
| <b>NP-25<br/>(B-5)</b> | 16.5 | 1.05 | Cellulose, water, plant fibers, GLY, PG, NaCl, nicotine, aromas, tartaric acid, Na <sub>2</sub> CO <sub>3</sub> , CaCl <sub>2</sub> , acesulfame potassium, ethanol, triacetin |
| <b>NP-26<br/>(B-5)</b> | 15.5 | 1    | Cellulose, water, plant fibers, GLY, salt, nicotine, aromas, NaHCO <sub>3</sub> , tartaric acid, CaCl <sub>2</sub> , acesulfame potassium                                      |

Table S2: Average NP mass, deviation from the reported mass on the labelling, average NP moisture content, and average pouch mass  $\pm$  respective standard deviation (s) from three replicates.

| <b>Sample designation</b> | <b>Average NP mass <math>\pm</math> s [mg]</b> | <b>Deviation from the reported mass [%]</b> | <b>Average NP moisture content <math>\pm</math> s [%]</b> | <b>Average pouch mass <math>\pm</math> s [mg]</b> |
|---------------------------|------------------------------------------------|---------------------------------------------|-----------------------------------------------------------|---------------------------------------------------|
| NP-1                      | 1021.9 $\pm$ 23.5                              | 2.2                                         | 55.1 $\pm$ 1.9                                            | 27.2 $\pm$ 2.0                                    |
| NP-2                      | 734.1 $\pm$ 19.2                               | -1.6                                        | 53.6 $\pm$ 0.8                                            | 21.4 $\pm$ 0.7                                    |
| NP-3                      | 731.7 $\pm$ 24.9                               | -1.8                                        | 53.3 $\pm$ 0.5                                            | 18.1 $\pm$ 1.2                                    |
| NP-4                      | 695.7 $\pm$ 30.4                               | -5.4                                        | 52.1 $\pm$ 0.8                                            | 22.9 $\pm$ 2.6                                    |
| NP-5                      | 407.6 $\pm$ 42.6                               | -1.2                                        | 40.6 $\pm$ 1.0                                            | 50.9 $\pm$ 2.1                                    |
| NP-6                      | 400.7 $\pm$ 14.7                               | -1.9                                        | 35.1 $\pm$ 1.9                                            | 44.9 $\pm$ 1.9                                    |
| NP-7                      | 442.5 $\pm$ 33.8                               | 2.3                                         | 34.9 $\pm$ 0.5                                            | 45.6 $\pm$ 1.9                                    |
| NP-8                      | 679.9 $\pm$ 59.4                               | -2.0                                        | 46.1 $\pm$ 3.2                                            | 57.0 $\pm$ 2.2                                    |
| NP-9                      | 701.7 $\pm$ 104.5                              | 0.2                                         | 44.9 $\pm$ 0.7                                            | 65.6 $\pm$ 2.5                                    |
| NP-10                     | 630.9 $\pm$ 176.6                              | -6.9                                        | 43.9 $\pm$ 0.4                                            | 68.1 $\pm$ 3.6                                    |
| NP-11                     | 681.1 $\pm$ 3.2                                | -1.9                                        | 50.6 $\pm$ 0.6                                            | 60.8 $\pm$ 6.2                                    |
| NP-12                     | 679.9 $\pm$ 53.4                               | -2.0                                        | 47.0 $\pm$ 2.1                                            | 55.4 $\pm$ 1.0                                    |
| NP-13                     | 725.8 $\pm$ 35.8                               | 2.6                                         | 46.0 $\pm$ 1.4                                            | 74.2 $\pm$ 1.4                                    |
| NP-14                     | 690.5 $\pm$ 12.3                               | -0.9                                        | 41.5 $\pm$ 0.5                                            | 72.6 $\pm$ 1.0                                    |
| NP-15                     | 623.1 $\pm$ 17.2                               | -7.7                                        | 36.0 $\pm$ 1.1                                            | 66.8 $\pm$ 1.8                                    |
| NP-16                     | 718.5 $\pm$ 18.9                               | 1.9                                         | 51.3 $\pm$ 0.6                                            | 62.2 $\pm$ 3.5                                    |
| NP-17                     | 638.5 $\pm$ 11.5                               | -6.1                                        | 44.5 $\pm$ 0.6                                            | 54.2 $\pm$ 0.8                                    |
| NP-18                     | 604.6 $\pm$ 7.7                                | -9.5                                        | 41.1 $\pm$ 0.8                                            | 57.4 $\pm$ 2.2                                    |
| NP-19                     | 493.2 $\pm$ 4.0                                | -0.7                                        | 37.3 $\pm$ 0.8                                            | 55.3 $\pm$ 2.4                                    |
| NP-20                     | 474.8 $\pm$ 4.3                                | -2.5                                        | 39.1 $\pm$ 1.0                                            | 49.6 $\pm$ 1.4                                    |
| NP-21                     | 812.3 $\pm$ 16.2                               | 1.2                                         | 47.9 $\pm$ 0.9                                            | 70.3 $\pm$ 2.5                                    |
| NP-22                     | 488.1 $\pm$ 1.6                                | -1.2                                        | 38.7 $\pm$ 0.3                                            | 58.1 $\pm$ 0.9                                    |
| NP-23                     | 816.5 $\pm$ 58.8                               | 1.7                                         | 40.5 $\pm$ 0.4                                            | 57.3 $\pm$ 1.4                                    |
| NP-24                     | 819.2 $\pm$ 22.6                               | 1.9                                         | 40.4 $\pm$ 0.3                                            | 49.0 $\pm$ 2.1                                    |
| NP-25                     | 991.5 $\pm$ 23.9                               | -5.9                                        | 39.5 $\pm$ 0.3                                            | 58.2 $\pm$ 1.5                                    |
| NP-26                     | 961.6 $\pm$ 11.6                               | -3.8                                        | 40.1 $\pm$ 0.3                                            | 66.3 $\pm$ 4.1                                    |

Table S3: Heatsticks (HSs) sample designations and their brand (reported as HS-X and B-X, respectively), HS mass, heatstick filler (HSF) mass, filter mass, paper mass, polyactic acid filter mass, and susceptor mass  $\pm$  respective s.

| Sample designation (Brand) | Average HS mass $\pm$ s [mg] | Average HSF mass $\pm$ s [mg] | Average filter mass $\pm$ s [mg] | Average paper mass $\pm$ s [mg] | Average polyactic acid filter mass $\pm$ s [mg] | Average susceptor mass $\pm$ s [mg] |
|----------------------------|------------------------------|-------------------------------|----------------------------------|---------------------------------|-------------------------------------------------|-------------------------------------|
| HS-1 (B-6)                 | 703.1 $\pm$ 8.3              | 238.2 $\pm$ 10.7              | 100.1 $\pm$ 1.8                  | 137.9 $\pm$ 7.3                 | 227.1 $\pm$ 6.1                                 | /                                   |
| HS-2 (B-6)                 | 709.2 $\pm$ 3.7              | 248.9 $\pm$ 4.4               | 99.9 $\pm$ 2.1                   | 131.0 $\pm$ 1.8                 | 228.5 $\pm$ 4.0                                 | /                                   |
| HS-3 (B-6)                 | 710.2 $\pm$ 0.9              | 243.3 $\pm$ 5.0               | 107.1 $\pm$ 2.8                  | 131.5 $\pm$ 0.4                 | 226.9 $\pm$ 4.1                                 | /                                   |
| HS-4 (B-6)                 | 713.0 $\pm$ 6.7              | 251.6 $\pm$ 1.7               | 99.0 $\pm$ 3.2                   | 130.5 $\pm$ 1.1                 | 230.3 $\pm$ 7.5                                 | /                                   |
| HS-5 (B-6)                 | 705.4 $\pm$ 2.0              | 246.7 $\pm$ 2.8               | 96.9 $\pm$ 0.9                   | 133.6 $\pm$ 7.4                 | 227.1 $\pm$ 8.5                                 | /                                   |
| HS-6 (B-7)                 | 716.2 $\pm$ 2.6              | 245.4 $\pm$ 2.5               | 107.6 $\pm$ 2.9                  | 135.5 $\pm$ 1.3                 | 226.2 $\pm$ 4.5                                 | /                                   |
| HS-7 (B-7)                 | 718.9 $\pm$ 2.3              | 249.8 $\pm$ 2.9               | 108.3 $\pm$ 1.3                  | 131.9 $\pm$ 0.8                 | 228.0 $\pm$ 2.0                                 | /                                   |
| HS-8 (B-7)                 | 721.2 $\pm$ 5.1              | 252.4 $\pm$ 4.3               | 108.4 $\pm$ 2.2                  | 132.4 $\pm$ 1.3                 | 226.2 $\pm$ 4.5                                 | /                                   |
| HS-9 (B-7)                 | 720.6 $\pm$ 1.3              | 251.6 $\pm$ 0.6               | 108.1 $\pm$ 1.0                  | 135.9 $\pm$ 0.7                 | 224.3 $\pm$ 3.0                                 | /                                   |
| HS-10 (B-8)                | 597.3 $\pm$ 3.2              | 252.0 $\pm$ 2.0               | 210.4 $\pm$ 4.7                  | 112.5 $\pm$ 2.4                 | /                                               | 20.3 $\pm$ 0.1                      |
| HS-11 (B-8)                | 606.0 $\pm$ 9.0              | 266.3 $\pm$ 11.0              | 206.1 $\pm$ 0.9                  | 111.6 $\pm$ 2.8                 | /                                               | 20.7 $\pm$ 0.8                      |
| HS-12 (B-8)                | 599.9 $\pm$ 5.5              | 261.6 $\pm$ 7.6               | 206.7 $\pm$ 1.9                  | 110.7 $\pm$ 0.9                 | /                                               | 20.2 $\pm$ 0.3                      |
| HS-13 (B-8)                | 591.8 $\pm$ 6.6              | 247.5 $\pm$ 5.1               | 208.3 $\pm$ 4.6                  | 113.8 $\pm$ 3.0                 | /                                               | 20.9 $\pm$ 0.2                      |
| HS-14 (B-8)                | 583.1 $\pm$ 2.2              | 247.5 $\pm$ 2.9               | 204.7 $\pm$ 2.7                  | 110.6 $\pm$ 1.6                 | /                                               | 19.8 $\pm$ 0.2                      |
| HS-15 (B-8)                | 585.2 $\pm$ 5.1              | 245.8 $\pm$ 5.7               | 202.2 $\pm$ 8.1                  | 116.1 $\pm$ 4.9                 | /                                               | 20.0 $\pm$ 0.2                      |
| HS-16 (B-8)                | 595.6 $\pm$ 3.7              | 252.5 $\pm$ 2.7               | 207.2 $\pm$ 6.2                  | 114.7 $\pm$ 1.9                 | /                                               | 20.5 $\pm$ 0.2                      |

Table S4: Inductively coupled plasma-mass spectrometry operating conditions for the analysis of 18 elements in HSs and NPs.

|                                           |                             |
|-------------------------------------------|-----------------------------|
| <b>Interface</b>                          | Cu sampler and skimmer cone |
| <b>Sampling depth of the ICP-MS torch</b> | 5.0 mm                      |
| <b>Cooling chamber temperature</b>        | 5 °C                        |
| <b>Radiofrequency power</b>               | 1.20 kW                     |
| <b>Ar plasma gas flow</b>                 | 9.0 L/min                   |
| <b>Ar auxilliary gas flow</b>             | 1.10 L/min                  |
| <b>Ar carrier gas flow</b>                | 0.70 L/min                  |
| <b>He collision cell flow</b>             | 6.0 mL/min                  |
| <b>Collision cell voltage</b>             | -21 V                       |
| <b>Collision cell energy filter</b>       | 7.0 V                       |

Table S5: Weighted linear regression parameters and the sum of the absolute values of the relative errors ( $\sum|RE|$ ) for the unweighted and weighted models.  $A_{\text{nicotine}}$  represents the area under the chromatographic peak for nicotine, while  $A_{\text{quinoline}}$  represents the area under the chromatographic peak for quinoline.

| <b>Model</b>                | <b>Weighting factor (<math>w_i</math>)</b> | <b>Model slope</b><br>[ $(A_{\text{nicotine}} \cdot L) / (A_{\text{quinoline}} \cdot \text{mg})$ ] | <b>Model intercept</b><br>[ $A_{\text{nicotine}} / A_{\text{quinoline}}$ ] | <b>Model correlation coefficient</b> | <b><math>\sum RE </math> [%]</b> |
|-----------------------------|--------------------------------------------|----------------------------------------------------------------------------------------------------|----------------------------------------------------------------------------|--------------------------------------|----------------------------------|
| <b>1 (unweighted model)</b> | 1                                          | 0.0069                                                                                             | -0.0609                                                                    | 0.9981                               | 53.6                             |
| <b>2</b>                    | $1/x_i^{0.5}$                              | 0.0069                                                                                             | -0.0460                                                                    | 0.9986                               | 36.3                             |
| <b>3</b>                    | $1/x_i$                                    | 0.0068                                                                                             | -0.0380                                                                    | 0.9987                               | 27.1                             |
| <b>4</b>                    | $1/x_i^2$                                  | 0.0067                                                                                             | -0.0327                                                                    | 0.9981                               | 22.2                             |
| <b>5</b>                    | $1/y_i^{0.5}$                              | 0.0068                                                                                             | -0.0436                                                                    | 0.9986                               | 33.5                             |
| <b>6</b>                    | $1/y_i$                                    | 0.0068                                                                                             | -0.0359                                                                    | 0.9987                               | 24.8                             |
| <b>7</b>                    | $1/y_i^2$                                  | 0.0066                                                                                             | -0.0320                                                                    | 0.9979                               | 21.9                             |

Table S6: Average nicotine content  $\pm s$  in HSs expressed in both mg/g of HSF and in mg/HS.

|              | <b>Average nicotine content <math>\pm s</math></b><br><b>[mg/g of HSF]</b> | <b>Average nicotine content <math>\pm s</math></b><br><b>[mg/HS]</b> |
|--------------|----------------------------------------------------------------------------|----------------------------------------------------------------------|
| <b>HS-1</b>  | 13.2 $\pm$ 0.1                                                             | 3.1 $\pm$ 0.1                                                        |
| <b>HS-2</b>  | 14.0 $\pm$ 0.1                                                             | 3.5 $\pm$ 0.1                                                        |
| <b>HS-3</b>  | 13.4 $\pm$ 0.1                                                             | 3.3 $\pm$ 0.1                                                        |
| <b>HS-4</b>  | 15.5 $\pm$ 0.1                                                             | 3.9 $\pm$ 0.1                                                        |
| <b>HS-5</b>  | 12.6 $\pm$ 0.1                                                             | 3.1 $\pm$ 0.1                                                        |
| <b>HS-6</b>  | 14.2 $\pm$ 0.1                                                             | 3.5 $\pm$ 0.1                                                        |
| <b>HS-7</b>  | 15.7 $\pm$ 0.5                                                             | 3.9 $\pm$ 0.1                                                        |
| <b>HS-8</b>  | 16.4 $\pm$ 0.1                                                             | 4.1 $\pm$ 0.1                                                        |
| <b>HS-9</b>  | 14.0 $\pm$ 0.1                                                             | 3.5 $\pm$ 0.1                                                        |
| <b>HS-10</b> | 15.5 $\pm$ 0.3                                                             | 3.9 $\pm$ 0.1                                                        |
| <b>HS-11</b> | 15.4 $\pm$ 0.2                                                             | 4.1 $\pm$ 0.1                                                        |
| <b>HS-12</b> | 15.3 $\pm$ 0.1                                                             | 4.0 $\pm$ 0.1                                                        |
| <b>HS-13</b> | 14.8 $\pm$ 0.1                                                             | 3.7 $\pm$ 0.1                                                        |
| <b>HS-14</b> | 14.5 $\pm$ 0.1                                                             | 3.6 $\pm$ 0.1                                                        |
| <b>HS-15</b> | 15.2 $\pm$ 0.1                                                             | 3.7 $\pm$ 0.1                                                        |
| <b>HS-16</b> | 16.6 $\pm$ 0.1                                                             | 4.2 $\pm$ 0.1                                                        |

Table S7: Average nicotine content  $\pm$  s in NPs, expressed in both mg/g of NPF and in mg/NP with deviation from the declared nicotine content.

|       | Average nicotine content $\pm$ s [mg/g of NPF] | Average nicotine content $\pm$ s [mg/NP] | Declared nicotine content [mg/NP] | Deviation from the declared nicotine content [%] |
|-------|------------------------------------------------|------------------------------------------|-----------------------------------|--------------------------------------------------|
| NP-1  | 11.9 $\pm$ 0.1                                 | 10.7 $\pm$ 0.1                           | 16.4                              | -34.6                                            |
| NP-2  | 16.2 $\pm$ 0.1                                 | 9.1 $\pm$ 0.1                            | 12.3                              | -25.9                                            |
| NP-3  | 12.7 $\pm$ 0.1                                 | 9.0 $\pm$ 0.1                            | 12.3                              | -27.2                                            |
| NP-4  | 16.8 $\pm$ 0.1                                 | 9.0 $\pm$ 0.1                            | 12.3                              | -26.8                                            |
| NP-5  | 7.6 $\pm$ 0.2                                  | 3.2 $\pm$ 0.1                            | 4                                 | -20.0                                            |
| NP-6  | 8.4 $\pm$ 0.1                                  | 2.6 $\pm$ 0.1                            | 4                                 | -34.1                                            |
| NP-7  | 12.3 $\pm$ 0.1                                 | 5.1 $\pm$ 0.1                            | 6                                 | -14.4                                            |
| NP-8  | 14.7 $\pm$ 0.1                                 | 8.3 $\pm$ 0.1                            | 10                                | -17.1                                            |
| NP-9  | 12.3 $\pm$ 0.3                                 | 4.6 $\pm$ 0.1                            | 8                                 | -42.9                                            |
| NP-10 | 12.9 $\pm$ 0.1                                 | 7.8 $\pm$ 0.1                            | 10.9                              | -28.1                                            |
| NP-11 | 14.5 $\pm$ 0.1                                 | 6.9 $\pm$ 0.1                            | 10                                | -30.8                                            |
| NP-12 | 19.5 $\pm$ 0.1                                 | 9.1 $\pm$ 0.1                            | 14                                | -34.8                                            |
| NP-13 | 20.0 $\pm$ 0.1                                 | 10.9 $\pm$ 0.1                           | 17                                | -35.9                                            |
| NP-14 | 15.6 $\pm$ 0.3                                 | 8.3 $\pm$ 0.1                            | 14                                | -40.5                                            |
| NP-15 | 13.1 $\pm$ 0.1                                 | 6.6 $\pm$ 0.1                            | 9                                 | -26.7                                            |
| NP-16 | 8.8 $\pm$ 0.3                                  | 5.2 $\pm$ 0.1                            | 11                                | -52.9                                            |
| NP-17 | 17.8 $\pm$ 0.1                                 | 9.3 $\pm$ 0.1                            | 11                                | -15.2                                            |
| NP-18 | 14.1 $\pm$ 0.2                                 | 6.8 $\pm$ 0.1                            | 11                                | -38.1                                            |
| NP-19 | 12.9 $\pm$ 0.1                                 | 5.6 $\pm$ 0.1                            | 8.25                              | -32.3                                            |
| NP-20 | 10.8 $\pm$ 0.1                                 | 4.2 $\pm$ 0.1                            | 8.25                              | -48.8                                            |
| NP-21 | 14.2 $\pm$ 0.1                                 | 10.6 $\pm$ 0.1                           | 13.2                              | -19.4                                            |
| NP-22 | 9.5 $\pm$ 0.2                                  | 4.2 $\pm$ 0.1                            | 8.25                              | -49.6                                            |
| NP-23 | 14.7 $\pm$ 0.2                                 | 10.6 $\pm$ 0.1                           | 12                                | -11.4                                            |
| NP-24 | 15.0 $\pm$ 0.1                                 | 11.1 $\pm$ 0.1                           | 12                                | -7.3                                             |
| NP-25 | 17.8 $\pm$ 0.1                                 | 15.1 $\pm$ 0.1                           | 16.5                              | -8.5                                             |
| NP-26 | 15.5 $\pm$ 0.2                                 | 11.7 $\pm$ 0.2                           | 15.5                              | -24.8                                            |

Table S8: ICP-MS validation parameters for 18 elements in HSs (CC in brackets indicates the use of a collision cell, while NCC stands for no collision cell), including the limit of detection (LOD), limit of quantification (LOQ), the linear concentration range, the square of the calibration coefficient ( $R^2$ ), accuracy (represented as recovery, Re), and precision (represented as the relative standard deviation, RSD).  $I_{HM}$  represents the intensity of the measured elements, while  $I_{IS}$  represents the intensity of the internal standard.

| Measured element isotope | LOD [ng/L] | LOQ / [ng/L] | Determined linear concentration range [ $\mu$ g/L] | Slope / [ $(I_{HM} \cdot L) / (I_{IS} \cdot \mu$ g)] | Intercept [ $I_{HM}/I_{IS}$ ] | $R^2$  | Re [%] | RSD [%] |
|--------------------------|------------|--------------|----------------------------------------------------|------------------------------------------------------|-------------------------------|--------|--------|---------|
| <sup>27</sup> Al (CC)    | 137        | 456          | 0.5–400.0                                          | 0.1700                                               | -0.0917                       | 0.9997 | 88.5   | 1.2     |
| <sup>75</sup> As (CC)    | 2          | 8            | LOQ–30.0                                           | 3.1740                                               | -0.0876                       | 0.9999 | 102.1  | 0.3     |
| <sup>137</sup> Ba (CC)   | 65         | 217          | LOQ–60.0                                           | 0.4739                                               | 0.0161                        | 0.9999 | 97.5   | 1.6     |
| <sup>114</sup> Cd (NCC)  | 34         | 114          | LOQ–30.0                                           | 0.8328                                               | 0.0481                        | 0.9999 | 98.6   | 2.2     |
| <sup>59</sup> Co (CC)    | 1          | 3            | LOQ–30.0                                           | 36.2771                                              | 0.1563                        | 1.0000 | 97.3   | 1.9     |
| <sup>52</sup> Cr (CC)    | 2          | 6            | LOQ–30.0                                           | 21.5125                                              | 0.8420                        | 0.9999 | 97.8   | 2.0     |

|                            |     |     |           |         |         |        |       |     |
|----------------------------|-----|-----|-----------|---------|---------|--------|-------|-----|
| <sup>65</sup> Cu (CC)      | 93  | 309 | 0.5–30.0  | 15.8204 | -2.5067 | 0.9999 | 95.4  | 1.8 |
| <sup>56</sup> Fe (CC)      | 26  | 86  | 5.0–300.0 | 18.4174 | 14.9390 | 0.9999 | 95.5  | 1.0 |
| <sup>69</sup> Ga (CC)      | 3   | 10  | LOQ–30.0  | 12.4596 | 0.0534  | 0.9999 | 96.6  | 1.6 |
| <sup>55</sup> Mn (CC)      | 2   | 5   | 0.5–60.0  | 9.5439  | 0.3996  | 0.9999 | 96.3  | 1.3 |
| <sup>98</sup> Mo (CC)      | 11  | 37  | LOQ–30.0  | 2.0762  | 0.3576  | 0.9998 | 102.9 | 1.1 |
| <sup>60</sup> Ni (CC)      | 2   | 7   | LOQ–30.0  | 10.8297 | 0.3674  | 0.9999 | 96.9  | 2.5 |
| <sup>207</sup> Pb<br>(NCC) | 72  | 239 | LOQ–30.0  | 1.1265  | 0.1047  | 0.9997 | 98.1  | 2.2 |
| <sup>118</sup> Sn<br>(NCC) | 113 | 376 | LOQ–30.0  | 0.8901  | 0.0809  | 0.9998 | 101.6 | 1.0 |
| <sup>88</sup> Sr (CC)      | 3   | 9   | LOQ–60.0  | 12.5138 | -0.4029 | 1.0000 | 96.0  | 1.7 |
| <sup>47</sup> Ti (CC)      | 17  | 55  | LOQ–60.0  | 0.3047  | 0.0539  | 0.9999 | 96.2  | 0.7 |
| <sup>205</sup> Tl (NCC)    | 36  | 121 | LOQ–30.0  | 3.6841  | 0.5110  | 0.9997 | 94.1  | 2.7 |
| <sup>68</sup> Zn (CC)      | 21  | 72  | 5.0–50.0  | 5.0834  | -2.1202 | 0.9998 | 86.2  | 3.8 |

Table S9: ICP-MS validation parameters for 18 elements in NPs (CC in brackets indicates the use of a collision cell, while NCC stands for no collision cell), including LOD, LOQ, the linear concentration range, R<sup>2</sup>, accuracy (represented as Re), and precision (represented as RSD).

| Measured element isotope   | LOD / [ng/L] | LOQ / [ng/L] | Determined linear concentration range / [µg/L] | Slope / [(I <sub>HM</sub> · L) / (I <sub>IS</sub> · µg)] | Intercept [I <sub>HM</sub> /I <sub>IS</sub> ] | R <sup>2</sup> | Re [%] | RSD [%] |
|----------------------------|--------------|--------------|------------------------------------------------|----------------------------------------------------------|-----------------------------------------------|----------------|--------|---------|
| <sup>27</sup> Al (CC)      | 252          | 839          | 5.0–60.0                                       | 0.1764                                                   | -0.0086                                       | 0.9996         | 90.5   | 1.1     |
| <sup>75</sup> As (CC)      | 1            | 5            | LOQ–30.0                                       | 2.9077                                                   | -0.0660                                       | 1.0000         | 101.9  | 1.2     |
| <sup>137</sup> Ba (CC)     | 197          | 657          | LOQ–30.0                                       | 0.4808                                                   | 0.0186                                        | 1.0000         | 94.9   | 0.7     |
| <sup>114</sup> Cd<br>(NCC) | 30           | 99           | LOQ–30.0                                       | 0.7874                                                   | 0.1054                                        | 0.9999         | 95.3   | 0.6     |
| <sup>59</sup> Co (CC)      | 1            | 3            | LOQ–25.0                                       | 35.0840                                                  | -0.8046                                       | 0.9999         | 89.8   | 0.9     |
| <sup>52</sup> Cr (CC)      | 2            | 5            | LOQ–30.0                                       | 23.5292                                                  | 0.4932                                        | 0.9999         | 89.3   | 0.4     |
| <sup>65</sup> Cu (CC)      | 129          | 431          | LOQ–30.0                                       | 15.9876                                                  | -8.1033                                       | 1.0000         | 88.2   | 0.7     |
| <sup>56</sup> Fe (CC)      | 42           | 140          | 5.0–50.0                                       | 20.8520                                                  | 2.4233                                        | 0.9974         | 102.5  | 6.9     |
| <sup>69</sup> Ga (CC)      | 5            | 17           | LOQ–30.0                                       | 12.4535                                                  | -0.5050                                       | 1.0000         | 95.2   | 1.1     |
| <sup>55</sup> Mn (CC)      | 2            | 6            | LOQ–30.0                                       | 10.4222                                                  | 0.4824                                        | 0.9999         | 92.3   | 0.7     |
| <sup>98</sup> Mo (CC)      | 7            | 23           | LOQ–30.0                                       | 2.1111                                                   | 0.1543                                        | 1.0000         | 93.7   | 1.6     |
| <sup>60</sup> Ni (CC)      | 4            | 12           | LOQ–30.0                                       | 10.5972                                                  | 0.0949                                        | 1.0000         | 89.2   | 0.9     |
| <sup>207</sup> Pb<br>(NCC) | 181          | 603          | LOQ–30.0                                       | 1.1571                                                   | 0.0053                                        | 1.0000         | 92.5   | 1.1     |
| <sup>118</sup> Sn<br>(NCC) | 122          | 408          | LOQ–30.0                                       | 0.8788                                                   | 0.0672                                        | 0.9999         | 94.4   | 1.5     |
| <sup>88</sup> Sr (CC)      | 4            | 12           | LOQ–30.0                                       | 11.3637                                                  | -0.2935                                       | 0.9999         | 96.1   | 1.3     |
| <sup>47</sup> Ti (CC)      | 18           | 58           | LOQ–30.0                                       | 0.3217                                                   | 0.0311                                        | 0.9996         | 96.9   | 1.0     |
| <sup>205</sup> Tl<br>(NCC) | 24           | 82           | LOQ–30.0                                       | 3.7866                                                   | 0.3486                                        | 0.9999         | 94.9   | 0.6     |
| <sup>68</sup> Zn (CC)      | 69           | 228          | 5.0–60.0                                       | 4.4560                                                   | 3.6320                                        | 0.9985         | 92.8   | 1.2     |

Table S10: Elemental content in HSs as measured by ICP-MS, reported as an average of three replicates  $\pm$  s.

|              | Al              |                  | As              |                  | Ba              |                  | Cd              |                  | Co              |                  | Cr              |                  | Cu              |                  |
|--------------|-----------------|------------------|-----------------|------------------|-----------------|------------------|-----------------|------------------|-----------------|------------------|-----------------|------------------|-----------------|------------------|
|              | $\mu\text{g/g}$ | $\mu\text{g/HS}$ |
| <b>HS-1</b>  | 905.05          | 215.58           | 0.34            | 0.08             | 63.36           | 15.09            | 0.49            | 0.12             | 0.89            | 0.21             | 2.28            | 0.54             | 9.18            | 2.19             |
|              | $\pm$           | $\pm$            |
|              | 0.11            | 0.03             | 0.02            | 0.00             | 0.57            | 0.13             | 0.00            | 0.00             | 0.02            | 0.01             | 0.00            | 0.00             | 0.13            | 0.03             |
| <b>HS-2</b>  | 782.12          | 194.67           | 0.34            | 0.08             | 68.36           | 17.02            | 0.33            | 0.08             | 0.73            | 0.18             | 1.10            | 0.27             | 8.82            | 2.20             |
|              | $\pm$           | $\pm$            |
|              | 10.59           | 2.64             | 0.10            | 0.02             | 0.61            | 0.15             | 0.00            | 0.00             | 0.02            | 0.00             | 0.11            | 0.03             | 0.61            | 0.15             |
| <b>HS-3</b>  | 978.23          | 238.00           | 0.29            | 0.07             | 79.24           | 19.28            | 0.57            | 0.14             | 0.99            | 0.24             | 2.48            | 0.60             | 9.59            | 2.33             |
|              | $\pm$           | $\pm$            |
|              | 61.02           | 14.85            | 0.03            | 0.01             | 4.45            | 1.08             | 0.00            | 0.00             | 0.06            | 0.01             | 0.38            | 0.09             | 0.40            | 0.10             |
| <b>HS-4</b>  | 696.14          | 175.15           | 0.30            | 0.08             | 52.15           | 13.12            | 0.38            | 0.10             | 0.77            | 0.19             | 1.92            | 0.48             | 8.81            | 2.22             |
|              | $\pm$           | $\pm$            |
|              | 7.44            | 1.87             | 0.01            | 0.00             | 0.32            | 0.08             | 0.00            | 0.00             | 0.01            | 0.00             | 0.20            | 0.05             | 0.06            | 0.02             |
| <b>HS-5</b>  | 988.05          | 243.75           | 0.29            | 0.07             | 66.63           | 16.44            | 0.40            | 0.10             | 0.91            | 0.22             | 2.17            | 0.54             | 8.55            | 2.11             |
|              | $\pm$           | $\pm$            |
|              | 42.22           | 10.41            | 0.02            | 0.01             | 2.99            | 0.74             | 0.02            | 0.01             | 0.03            | 0.01             | 0.10            | 0.03             | 0.31            | 0.08             |
| <b>HS-6</b>  | 846.99          | 207.85           | 0.31            | 0.08             | 74.11           | 18.19            | 0.47            | 0.12             | 0.87            | 0.21             | 1.32            | 0.32             | 8.95            | 2.20             |
|              | $\pm$           | $\pm$            |
|              | 33.54           | 8.23             | 0.01            | 0.00             | 3.02            | 0.74             | 0.02            | 0.01             | 0.04            | 0.01             | 0.03            | 0.01             | 0.38            | 0.09             |
| <b>HS-7</b>  | 698.95          | 174.60           | 0.26            | 0.06             | 76.55           | 19.12            | 0.24            | 0.06             | 0.75            | 0.19             | 0.88            | 0.22             | 7.69            | 1.92             |
|              | $\pm$           | $\pm$            |
|              | 0.73            | 0.18             | 0.01            | 0.00             | 0.39            | 0.10             | 0.00            | 0.00             | 0.01            | 0.00             | 0.03            | 0.01             | 0.00            | 0.00             |
| <b>HS-8</b>  | 804.68          | 203.10           | 0.30            | 0.08             | 63.34           | 15.99            | 0.50            | 0.13             | 0.70            | 0.18             | 1.20            | 0.30             | 8.76            | 2.21             |
|              | $\pm$           | $\pm$            |
|              | 25.91           | 6.54             | 0.00            | 0.00             | 0.90            | 0.23             | 0.01            | 0.00             | 0.01            | 0.00             | 0.08            | 0.02             | 0.04            | 0.01             |
| <b>HS-9</b>  | 811.36          | 204.14           | 0.32            | 0.08             | 72.88           | 18.34            | 0.43            | 0.11             | 0.86            | 0.22             | 1.42            | 0.36             | 9.02            | 2.27             |
|              | $\pm$           | $\pm$            |
|              | 29.33           | 7.38             | 0.01            | 0.00             | 0.04            | 0.01             | 0.02            | 0.00             | 0.03            | 0.01             | 0.23            | 0.06             | 0.23            | 0.06             |
| <b>HS-10</b> | 959.76          | 241.86           | 0.39            | 0.10             | 61.21           | 15.42            | 0.49            | 0.12             | 0.90            | 0.23             | 3.25            | 0.82             | 8.36            | 2.11             |
|              | $\pm$           | $\pm$            |
|              | 23.43           | 5.90             | 0.02            | 0.00             | 0.82            | 0.21             | 0.01            | 0.00             | 0.00            | 0.00             | 0.28            | 0.07             | 0.05            | 0.01             |

|              |            |            |           |           |            |           |           |           |           |           |           |           |           |           |
|--------------|------------|------------|-----------|-----------|------------|-----------|-----------|-----------|-----------|-----------|-----------|-----------|-----------|-----------|
| <b>HS-11</b> | 922.17     | 245.57     | 0.38      | 0.10      | 59.38      | 15.81     | 0.45      | 0.12      | 0.93      | 0.25      | 2.89      | 0.77      | 8.15      | 2.17      |
|              | ±<br>15.97 | ±<br>4.25  | ±<br>0.01 | ±<br>0.00 | ±<br>0.62  | ±<br>0.17 | ±<br>0.01 | ±<br>0.00 | ±<br>0.03 | ±<br>0.01 | ±<br>0.11 | ±<br>0.03 | ±<br>0.17 | ±<br>0.04 |
| <b>HS-12</b> | 908.40     | 237.64     | 0.39      | 0.10      | 60.79      | 15.90     | 0.44      | 0.12      | 0.92      | 0.24      | 3.25      | 0.85      | 8.32      | 2.18      |
|              | ±<br>5.70  | ±<br>1.49  | ±<br>0.02 | ±<br>0.00 | ±<br>0.09  | ±<br>0.02 | ±<br>0.00 | ±<br>0.00 | ±<br>0.00 | ±<br>0.00 | ±<br>0.72 | ±<br>0.19 | ±<br>0.09 | ±<br>0.02 |
| <b>HS-13</b> | 870.18     | 215.37     | 0.33      | 0.08      | 61.26      | 15.16     | 0.36      | 0.09      | 0.91      | 0.22      | 2.81      | 0.70      | 8.48      | 2.10      |
|              | ±<br>6.75  | ±<br>1.67  | ±<br>0.00 | ±<br>0.00 | ±<br>0.14  | ±<br>0.03 | ±<br>0.00 | ±<br>0.00 | ±<br>0.01 | ±<br>0.00 | ±<br>0.04 | ±<br>0.01 | ±<br>0.08 | ±<br>0.02 |
| <b>HS-14</b> | 941.02     | 232.90     | 0.32      | 0.08      | 68.41      | 16.93     | 0.41      | 0.10      | 0.93      | 0.23      | 2.47      | 0.61      | 9.25      | 2.29      |
|              | ±<br>56.13 | ±<br>13.89 | ±<br>0.01 | ±<br>0.00 | ±<br>0.27  | ±<br>0.07 | ±<br>0.01 | ±<br>0.00 | ±<br>0.01 | ±<br>0.00 | ±<br>0.22 | ±<br>0.05 | ±<br>0.23 | ±<br>0.06 |
| <b>HS-15</b> | 890.50     | 218.88     | 0.32      | 0.08      | 62.64      | 15.40     | 0.41      | 0.10      | 0.86      | 0.21      | 2.68      | 0.66      | 8.14      | 2.00      |
|              | ±<br>1.55  | ±<br>0.38  | ±<br>0.01 | ±<br>0.00 | ±<br>0.31  | ±<br>0.08 | ±<br>0.00 | ±<br>0.00 | ±<br>0.02 | ±<br>0.00 | ±<br>0.03 | ±<br>0.01 | ±<br>0.16 | ±<br>0.04 |
| <b>HS-16</b> | 817.77     | 206.49     | 0.35      | 0.09      | 57.15      | 14.43     |           |           | 0.88      | 0.22      | 2.81      | 0.71      | 9.41      | 2.38      |
|              | ±<br>4.49  | ±<br>1.13  | ±<br>0.01 | ±<br>0.00 | ±<br>0.41  | ±<br>0.10 | <LOQ      | <LOQ      | ±<br>0.02 | ±<br>0.01 | ±<br>0.16 | ±<br>0.04 | ±<br>0.04 | ±<br>0.01 |
|              | <b>Fe</b>  |            | <b>Ga</b> |           | <b>Mn</b>  |           | <b>Mo</b> |           | <b>Ni</b> |           | <b>Pb</b> |           | <b>Sn</b> |           |
|              | µg/g       | µg/HS      | µg/g      | µg/HS     | µg/g       | µg/HS     | µg/g      | µg/HS     | µg/g      | µg/HS     | µg/g      | µg/HS     | µg/g      | µg/HS     |
| <b>HS-1</b>  | 596.69     | 142.13     | 32.97     | 7.85      | 152.34     | 36.29     |           |           | 3.00      | 0.71      |           |           | <LOD      | <LOD      |
|              | ±<br>15.50 | ±<br>3.69  | ±<br>0.60 | ±<br>0.14 | ±<br>1.05  | ±<br>0.25 | <LOQ      | <LOQ      | ±<br>0.28 | ±<br>0.07 | <LOQ      | <LOQ      | <LOD      | <LOD      |
| <b>HS-2</b>  | 461.43     | 114.85     | 35.93     | 8.94      | 154.26     | 38.39     |           |           | 1.60      | 0.40      |           |           | <LOD      | <LOD      |
|              | ±<br>7.96  | ±<br>1.98  | ±<br>0.21 | ±<br>0.05 | ±<br>0.97  | ±<br>0.24 | <LOD      | <LOD      | ±<br>0.19 | ±<br>0.05 | <LOD      | <LOD      | <LOD      | <LOD      |
| <b>HS-3</b>  | 671.41     | 163.35     | 40.95     | 9.96      | 176.62     | 42.97     |           |           | 2.65      | 0.64      |           |           | <LOD      | <LOD      |
|              | ±<br>2.41  | ±<br>0.59  | ±<br>2.44 | ±<br>0.59 | ±<br>10.19 | ±<br>2.48 | <LOQ      | <LOQ      | ±<br>0.09 | ±<br>0.02 | <LOQ      | <LOQ      | <LOD      | <LOD      |
| <b>HS-4</b>  | 415.41     | 104.52     | 27.25     | 6.86      | 118.89     | 29.91     |           |           | 2.23      | 0.56      |           |           | <LOD      | <LOD      |
|              | ±<br>1.29  | ±<br>0.33  | ±<br>0.27 | ±<br>0.07 | ±<br>0.67  | ±<br>0.17 | <LOQ      | <LOQ      | ±<br>0.13 | ±<br>0.03 | <LOQ      | <LOQ      | <LOD      | <LOD      |
| <b>HS-5</b>  | 619.14     | 152.74     | 35.43     | 8.74      | 144.72     | 35.70     | 0.16      | 0.04      | 2.01      | 0.50      | <LOQ      | <LOQ      | <LOD      | <LOD      |

|              |                      |                      |                    |                   |                     |                    |                   |                   |                   |                   |      |      |      |      |
|--------------|----------------------|----------------------|--------------------|-------------------|---------------------|--------------------|-------------------|-------------------|-------------------|-------------------|------|------|------|------|
|              | ±<br>54.00           | ±<br>13.32           | ±<br>0.05          | ±<br>0.01         | ±<br>6.86           | ±<br>1.69          | ±<br>0.01         | ±<br>0.00         | ±<br>0.03         | ±<br>0.01         |      |      |      |      |
| <b>HS-6</b>  | 469.28<br>±<br>1.12  | 115.16<br>±<br>0.28  | 38.22<br>±<br>1.44 | 9.38<br>±<br>0.35 | 163.74<br>±<br>6.64 | 40.18<br>±<br>1.63 | <LOQ              | <LOQ              | 1.76<br>±<br>0.13 | 0.43<br>±<br>0.03 | <LOQ | <LOQ | <LOD | <LOD |
| <b>HS-7</b>  | 419.67<br>±<br>0.15  | 104.83<br>±<br>0.04  | 39.75<br>±<br>0.00 | 9.93<br>±<br>0.00 | 148.07<br>±<br>0.42 | 36.99<br>±<br>0.10 | 0.18<br>±<br>0.01 | 0.05<br>±<br>0.00 | 1.13<br>±<br>0.01 | 0.28<br>±<br>0.00 | <LOQ | <LOQ | <LOD | <LOD |
| <b>HS-8</b>  | 470.44<br>±<br>2.51  | 118.74<br>±<br>0.63  | 32.94<br>±<br>0.51 | 8.31<br>±<br>0.13 | 143.66<br>±<br>1.96 | 36.26<br>±<br>0.49 | <LOD              | <LOD              | 1.38<br>±<br>0.06 | 0.35<br>±<br>0.02 | <LOQ | <LOQ | <LOD | <LOD |
| <b>HS-9</b>  | 462.71<br>±<br>28.07 | 116.42<br>±<br>7.06  | 37.12<br>±<br>0.65 | 9.34<br>±<br>0.16 | 160.58<br>±<br>2.09 | 40.40<br>±<br>0.52 | <LOD              | <LOD              | 2.74<br>±<br>0.89 | 0.69<br>±<br>0.22 | <LOQ | <LOQ | <LOD | <LOD |
| <b>HS-10</b> | 642.84<br>±<br>13.06 | 162.00<br>±<br>3.29  | 31.60<br>±<br>0.50 | 7.96<br>±<br>0.13 | 142.46<br>±<br>2.04 | 35.90<br>±<br>0.51 | <LOQ              | <LOQ              | 3.92<br>±<br>0.13 | 0.99<br>±<br>0.03 | <LOQ | <LOQ | <LOD | <LOD |
| <b>HS-11</b> | 621.44<br>±<br>31.92 | 165.49<br>±<br>8.50  | 30.78<br>±<br>0.20 | 8.20<br>±<br>0.05 | 138.10<br>±<br>0.04 | 36.78<br>±<br>0.01 | <LOD              | <LOD              | 3.87<br>±<br>0.11 | 1.03<br>±<br>0.03 | <LOQ | <LOQ | <LOD | <LOD |
| <b>HS-12</b> | 630.14<br>±<br>7.30  | 164.84<br>±<br>1.91  | 31.15<br>±<br>0.15 | 8.15<br>±<br>0.04 | 143.31<br>±<br>1.20 | 37.49<br>±<br>0.31 | <LOD              | <LOD              | 3.94<br>±<br>0.59 | 1.03<br>±<br>0.15 | <LOQ | <LOQ | <LOD | <LOD |
| <b>HS-13</b> | 586.90<br>±<br>0.35  | 145.26<br>±<br>0.09  | 31.18<br>±<br>0.32 | 7.72<br>±<br>0.08 | 140.64<br>±<br>0.50 | 34.81<br>±<br>0.12 | 0.16<br>±<br>0.03 | 0.04<br>±<br>0.01 | 3.49<br>±<br>0.20 | 0.86<br>±<br>0.05 | <LOQ | <LOQ | <LOD | <LOD |
| <b>HS-14</b> | 606.00<br>±<br>33.38 | 149.99<br>±<br>8.26  | 34.69<br>±<br>0.01 | 8.59<br>±<br>0.00 | 147.90<br>±<br>0.04 | 36.61<br>±<br>0.01 | 0.18<br>±<br>0.02 | 0.04<br>±<br>0.01 | 2.86<br>±<br>0.34 | 0.71<br>±<br>0.08 | <LOQ | <LOQ | <LOD | <LOD |
| <b>HS-15</b> | 604.00<br>±<br>50.80 | 148.46<br>±<br>12.49 | 31.31<br>±<br>0.36 | 7.70<br>±<br>0.09 | 134.47<br>±<br>0.70 | 33.05<br>±<br>0.17 | 0.23<br>±<br>0.03 | 0.06<br>±<br>0.01 | 3.59<br>±<br>0.12 | 0.88<br>±<br>0.03 | <LOQ | <LOQ | <LOD | <LOD |
| <b>HS-16</b> | 507.50               | 128.14               | 28.10              | 7.10              | 125.97              | 31.81              | <LOD              | <LOD              | 3.59              | 0.91              | <LOD | <LOD | <LOD | <LOD |

|              | ±<br>52.67         | ±<br>13.30         | ±<br>0.49          | ±<br>0.12          | ±<br>0.87 | ±<br>0.22 |                    |                   | ±<br>0.80 | ±<br>0.20 |  |  |  |  |
|--------------|--------------------|--------------------|--------------------|--------------------|-----------|-----------|--------------------|-------------------|-----------|-----------|--|--|--|--|
|              | <b>Sr</b>          |                    | <b>Ti</b>          |                    | <b>Tl</b> |           | <b>Zn</b>          |                   |           |           |  |  |  |  |
|              | µg/g               | µg/HS              | µg/g               | µg/HS              | µg/g      | µg/HS     | µg/g               | µg/HS             |           |           |  |  |  |  |
| <b>HS-1</b>  | 90.16<br>±<br>0.73 | 21.48<br>±<br>0.17 | 52.42<br>±<br>2.08 | 12.49<br>±<br>0.50 | <LOD      | <LOD      | 23.96<br>±<br>0.24 | 5.71<br>±<br>0.06 |           |           |  |  |  |  |
| <b>HS-2</b>  | 89.62<br>±<br>0.90 | 22.31<br>±<br>0.22 | 52.47<br>±<br>0.05 | 13.06<br>±<br>0.01 | <LOD      | <LOD      | 23.48<br>±<br>2.67 | 5.85<br>±<br>0.66 |           |           |  |  |  |  |
| <b>HS-3</b>  | 95.53<br>±<br>0.11 | 23.24<br>±<br>0.03 | 68.96<br>±<br>4.48 | 16.78<br>±<br>1.09 | <LOD      | <LOD      | 27.81<br>±<br>3.20 | 6.77<br>±<br>0.78 |           |           |  |  |  |  |
| <b>HS-4</b>  | 76.89<br>±<br>0.94 | 19.34<br>±<br>0.24 | 40.45<br>±<br>0.07 | 10.18<br>±<br>0.02 | <LOD      | <LOD      | 23.28<br>±<br>2.92 | 5.86<br>±<br>0.73 |           |           |  |  |  |  |
| <b>HS-5</b>  | 88.48<br>±<br>0.19 | 21.83<br>±<br>0.05 | 66.96<br>±<br>1.77 | 16.52<br>±<br>0.44 | <LOD      | <LOD      | 23.28<br>±<br>0.65 | 5.74<br>±<br>0.16 |           |           |  |  |  |  |
| <b>HS-6</b>  | 88.48<br>±<br>2.45 | 21.71<br>±<br>0.60 | 48.46<br>±<br>2.03 | 11.89<br>±<br>0.50 | <LOD      | <LOD      | 23.75<br>±<br>1.54 | 5.83<br>±<br>0.38 |           |           |  |  |  |  |
| <b>HS-7</b>  | 93.71<br>±<br>0.62 | 23.41<br>±<br>0.16 | 42.01<br>±<br>0.91 | 10.49<br>±<br>0.23 | <LOD      | <LOD      | 21.88<br>±<br>0.53 | 5.46<br>±<br>0.13 |           |           |  |  |  |  |
| <b>HS-8</b>  | 96.80<br>±<br>1.48 | 24.43<br>±<br>0.37 | 43.02<br>±<br>1.35 | 10.86<br>±<br>0.34 | <LOD      | <LOD      | 21.49<br>±<br>1.50 | 5.42<br>±<br>0.38 |           |           |  |  |  |  |
| <b>HS-9</b>  | 86.06<br>±<br>0.02 | 21.65<br>±<br>0.01 | 46.46<br>±<br>1.25 | 11.69<br>±<br>0.31 | <LOD      | <LOD      | 22.28<br>±<br>1.01 | 5.61<br>±<br>0.25 |           |           |  |  |  |  |
| <b>HS-10</b> | 88.84<br>±         | 22.39<br>±         | 53.25<br>±         | 13.42<br>±         | <LOD      | <LOD      | 21.02<br>±         | 5.30<br>±         |           |           |  |  |  |  |



|              |      |      |      |      |                   |                   |      |      |      |      |                   |                   |      |      |
|--------------|------|------|------|------|-------------------|-------------------|------|------|------|------|-------------------|-------------------|------|------|
|              |      |      |      |      | 0.02              | 0.01              |      |      |      |      | 0.14              | 0.04              |      |      |
| <b>NP-4</b>  | *    | *    | <LOD | <LOD | 0.83<br>±<br>0.03 | 0.26<br>±<br>0.01 | <LOD | <LOD | <LOD | <LOD | 0.49<br>±<br>0.16 | 0.15<br>±<br>0.05 | <LOD | <LOD |
| <b>NP-5</b>  | *    | *    | <LOD | <LOD | <LOQ              | <LOQ              | <LOD | <LOD | <LOD | <LOD | 0.70<br>±<br>0.07 | 0.13<br>±<br>0.01 | <LOD | <LOD |
| <b>NP-6</b>  | <LOQ | <LOQ | <LOD | <LOD | <LOQ              | <LOQ              | <LOD | <LOD | <LOD | <LOD | 0.52<br>±<br>0.00 | 0.11<br>±<br>0.00 | <LOD | <LOD |
| <b>NP-7</b>  | <LOQ | <LOQ | <LOD | <LOD | <LOQ              | <LOQ              | <LOD | <LOD | <LOD | <LOD | 0.21<br>±<br>0.03 | 0.05<br>±<br>0.01 | <LOD | <LOD |
| <b>NP-8</b>  | *    | *    | <LOD | <LOD | 0.63<br>±<br>0.01 | 0.19<br>±<br>0.00 | <LOD | <LOD | <LOD | <LOD | 0.22<br>±<br>0.04 | 0.07<br>±<br>0.01 | <LOD | <LOD |
| <b>NP-9</b>  | *    | *    | <LOD | <LOD | 0.55<br>±<br>0.01 | 0.18<br>±<br>0.00 | <LOD | <LOD | <LOD | <LOD | 0.32<br>±<br>0.24 | 0.10<br>±<br>0.08 | <LOD | <LOD |
| <b>NP-10</b> | <LOQ | <LOQ | <LOD | <LOD | 0.71<br>±<br>0.02 | 0.20<br>±<br>0.01 | <LOD | <LOD | <LOD | <LOD | 0.34<br>±<br>0.05 | 0.10<br>±<br>0.01 | <LOD | <LOD |
| <b>NP-11</b> | *    | *    | <LOD | <LOD | <LOQ              | <LOQ              | <LOD | <LOD | <LOD | <LOD | 0.29<br>±<br>0.00 | 0.08<br>±<br>0.00 | <LOD | <LOD |
| <b>NP-12</b> | <LOQ | <LOQ | <LOD | <LOD | <LOQ              | <LOQ              | <LOD | <LOD | <LOD | <LOD | 0.41<br>±<br>0.00 | 0.12<br>±<br>0.00 | <LOD | <LOD |
| <b>NP-13</b> | *    | *    | <LOD | <LOD | 0.46<br>±<br>0.02 | 0.15<br>±<br>0.01 | <LOD | <LOD | <LOD | <LOD | 0.41<br>±<br>0.02 | 0.13<br>±<br>0.01 | <LOD | <LOD |
| <b>NP-14</b> | *    | *    | <LOD | <LOD | <LOQ              | <LOQ              | <LOD | <LOD | <LOD | <LOD | 0.33<br>±         | 0.11<br>±         | <LOD | <LOD |

|              |                    |                    |      |      |                   |                   |      |      |      |      |      |                   |                   |                   |                   |
|--------------|--------------------|--------------------|------|------|-------------------|-------------------|------|------|------|------|------|-------------------|-------------------|-------------------|-------------------|
|              |                    |                    |      |      |                   |                   |      |      |      |      |      | 0.03              | 0.01              |                   |                   |
| <b>NP-15</b> | 23.61<br>±<br>0.96 | 7.84<br>±<br>0.32  | <LOD | <LOD | 1.84<br>±<br>0.07 | 0.61<br>±<br>0.02 | <LOD | <LOD | <LOD | <LOD | <LOD | 0.23<br>±<br>0.05 | 0.08<br>±<br>0.02 | <LOD              | <LOD              |
| <b>NP-16</b> | *                  | *                  | <LOD | <LOD | <LOQ              | <LOQ              | <LOD | <LOD | <LOD | <LOD | <LOD | 0.18<br>±<br>0.07 | 0.05<br>±<br>0.02 | <LOD              | <LOD              |
| <b>NP-17</b> | *                  | *                  | <LOD | <LOD | <LOQ              | <LOQ              | <LOD | <LOD | <LOD | <LOD | <LOD | 0.14<br>±<br>0.00 | 0.04<br>±<br>0.00 | <LOD              | <LOD              |
| <b>NP-18</b> | <LOQ               | <LOQ               | <LOD | <LOD | <LOQ              | <LOQ              | <LOD | <LOD | <LOD | <LOD | <LOD | 0.22<br>±<br>0.06 | 0.07<br>±<br>0.02 | <LOD              | <LOD              |
| <b>NP-19</b> | *                  | *                  | <LOD | <LOD | 2.51<br>±<br>0.02 | 0.64<br>±<br>0.01 | <LOD | <LOD | <LOD | <LOD | <LOD | 0.43<br>±<br>0.04 | 0.11<br>±<br>0.01 | <LOD              | <LOD              |
| <b>NP-20</b> | *                  | *                  | <LOD | <LOD | 4.49<br>±<br>0.12 | 1.08<br>±<br>0.03 | <LOD | <LOD | <LOD | <LOD | <LOD | 0.51<br>±<br>0.15 | 0.12<br>±<br>0.04 | <LOD              | <LOD              |
| <b>NP-21</b> | *                  | *                  | <LOD | <LOD | 9.20<br>±<br>0.28 | 3.25<br>±<br>0.10 | <LOD | <LOD | <LOD | <LOD | <LOD | 0.42<br>±<br>0.14 | 0.15<br>±<br>0.05 | <LOD              | <LOD              |
| <b>NP-22</b> | *                  | *                  | <LOD | <LOD | 4.67<br>±<br>0.05 | 1.13<br>±<br>0.01 | <LOD | <LOD | <LOD | <LOD | <LOD | <LOD              | <LOD              | <LOD              | <LOD              |
| <b>NP-23</b> | 21.80<br>±<br>0.90 | 9.34<br>±<br>0.38  | <LOD | <LOD | <LOQ              | <LOQ              | <LOD | <LOD | <LOD | <LOD | <LOD | *                 | *                 | 1.48<br>±<br>0.25 | 0.64<br>±<br>0.11 |
| <b>NP-24</b> | 29.11<br>±<br>0.12 | 12.77<br>±<br>0.05 | <LOD | <LOD | <LOQ              | <LOQ              | <LOD | <LOD | <LOD | <LOD | <LOD | <LOD              | <LOD              | 2.87<br>±<br>0.08 | 1.26<br>±<br>0.04 |
| <b>NP-25</b> | 26.37<br>±         | 14.29<br>±         | <LOD | <LOD | <LOQ              | <LOQ              | <LOD | <LOD | <LOD | <LOD | <LOD | <LOD              | <LOD              | 2.44<br>±         | 1.32<br>±         |

|              |            |           |           |           |           |           |           |       |           |           |           |           |           |           |
|--------------|------------|-----------|-----------|-----------|-----------|-----------|-----------|-------|-----------|-----------|-----------|-----------|-----------|-----------|
|              | 1.52       | 0.83      |           |           |           |           |           |       |           |           |           |           | 0.37      | 0.20      |
| <b>NP-26</b> | 32.08      | 16.35     | <LOD      | <LOD      | 3.15      | 1.60      | <LOD      | <LOD  | <LOD      | <LOD      | 0.04      | 0.02      | 1.32      | 0.67      |
|              | ±<br>0.02  | ±<br>0.01 |           |           | ±<br>0.02 | ±<br>0.01 |           |       |           |           | ±<br>0.00 | ±<br>0.00 | ±<br>0.02 | ±<br>0.01 |
|              | <b>Fe</b>  |           | <b>Ga</b> |           | <b>Mn</b> |           | <b>Mo</b> |       | <b>Ni</b> |           | <b>Pb</b> |           | <b>Sn</b> |           |
|              | µg/g       | µg/NP     | µg/g      | µg/NP     | µg/g      | µg/NP     | µg/g      | µg/NP | µg/g      | µg/NP     | µg/g      | µg/NP     | µg/g      | µg/NP     |
| <b>NP-1</b>  | 19.99      | 8.63      | 0.30      | 0.13      | 0.15      | 0.07      | <LOQ      | <LOQ  | 0.42      | 0.18      | <LOD      | <LOD      | <LOD      | <LOD      |
|              | ±<br>10.50 | ±<br>4.53 | ±<br>0.01 | ±<br>0.00 | ±<br>0.00 | ±<br>0.00 |           |       | ±<br>0.03 | ±<br>0.01 |           |           |           |           |
| <b>NP-2</b>  | 14.39      | 4.60      | 0.38      | 0.12      | 0.14      | 0.04      | <LOD      | <LOD  | 0.65      | 0.21      | <LOD      | <LOD      | <LOD      | <LOD      |
|              | ±<br>2.31  | ±<br>0.74 | ±<br>0.03 | ±<br>0.01 | ±<br>0.01 | ±<br>0.00 |           |       | ±<br>0.03 | ±<br>0.01 |           |           |           |           |
| <b>NP-3</b>  | *          | *         | 0.36      | 0.12      | 0.16      | 0.05      | <LOD      | <LOD  | 0.53      | 0.17      | <LOD      | <LOD      | <LOD      | <LOD      |
|              |            |           | ±<br>0.01 | ±<br>0.00 | ±<br>0.03 | ±<br>0.01 |           |       | ±<br>0.18 | ±<br>0.06 |           |           |           |           |
| <b>NP-4</b>  | *          | *         | 0.44      | 0.14      | 0.11      | 0.03      | <LOD      | <LOD  | 0.35      | 0.11      | <LOD      | <LOD      | <LOD      | <LOD      |
|              |            |           | ±<br>0.02 | ±<br>0.01 | ±<br>0.02 | ±<br>0.01 |           |       | ±<br>0.02 | ±<br>0.01 |           |           |           |           |
| <b>NP-5</b>  | *          | *         | 0.13      | 0.03      | 0.10      | 0.02      | <LOD      | <LOD  | 2.90      | 0.55      | <LOD      | <LOD      | <LOD      | <LOD      |
|              |            |           | ±<br>0.00 | ±<br>0.00 | ±<br>0.00 | ±<br>0.00 |           |       | ±<br>0.12 | ±<br>0.02 |           |           |           |           |
| <b>NP-6</b>  | *          | *         | 0.21      | 0.04      | 0.07      | 0.01      | <LOD      | <LOD  | 0.17      | 0.04      | <LOD      | <LOD      | <LOD      | <LOD      |
|              |            |           | ±<br>0.02 | ±<br>0.00 | ±<br>0.02 | ±<br>0.00 |           |       | ±<br>0.06 | ±<br>0.01 |           |           |           |           |
| <b>NP-7</b>  | 11.23      | 2.72      | 0.14      | 0.04      | 0.06      | 0.02      | <LOD      | <LOD  | 0.15      | 0.04      | <LOD      | <LOD      | <LOD      | <LOD      |
|              | ±<br>0.89  | ±<br>0.21 | ±<br>0.01 | ±<br>0.00 | ±<br>0.03 | ±<br>0.01 |           |       | ±<br>0.00 | ±<br>0.00 |           |           |           |           |
| <b>NP-8</b>  | 10.74      | 3.32      | 0.32      | 0.10      | 0.06      | 0.02      | <LOD      | <LOD  | 0.13      | 0.04      | <LOD      | <LOD      | <LOD      | <LOD      |
|              | ±<br>3.55  | ±<br>1.10 | ±<br>0.02 | ±<br>0.00 | ±<br>0.00 | ±<br>0.00 |           |       | ±<br>0.02 | ±<br>0.01 |           |           |           |           |
| <b>NP-9</b>  | *          | *         | 0.27      | 0.09      | 0.07      | 0.02      | <LOD      | <LOD  | 0.28      | 0.09      | <LOD      | <LOD      | <LOD      | <LOD      |
|              |            |           | ±<br>0.01 | ±<br>0.00 | ±<br>0.02 | ±<br>0.01 |           |       | ±<br>0.00 | ±<br>0.00 |           |           |           |           |

|              |                    |                   |                   |                   |                   |                   |      |      |                   |                   |      |      |      |      |
|--------------|--------------------|-------------------|-------------------|-------------------|-------------------|-------------------|------|------|-------------------|-------------------|------|------|------|------|
| <b>NP-10</b> | 13.36<br>±<br>5.54 | 3.82<br>±<br>1.58 | 0.37<br>±<br>0.01 | 0.11<br>±<br>0.00 | 0.08<br>±<br>0.01 | 0.02<br>±<br>0.00 | <LOD | <LOD | 0.17<br>±<br>0.04 | 0.05<br>±<br>0.01 | <LOD | <LOD | <LOD | <LOD |
| <b>NP-11</b> | *                  | *                 | 0.28<br>±<br>0.00 | 0.08<br>±<br>0.00 | 0.08<br>±<br>0.00 | 0.02<br>±<br>0.00 | <LOD | <LOD | 0.49<br>±<br>0.08 | 0.13<br>±<br>0.02 | <LOD | <LOD | <LOD | <LOD |
| <b>NP-12</b> | 12.26<br>±<br>0.25 | 3.74<br>±<br>0.07 | 0.13<br>±<br>0.02 | 0.04<br>±<br>0.01 | 0.10<br>±<br>0.06 | 0.03<br>±<br>0.02 | <LOD | <LOD | 0.34<br>±<br>0.19 | 0.10<br>±<br>0.06 | <LOD | <LOD | <LOD | <LOD |
| <b>NP-13</b> | *                  | *                 | 0.23<br>±<br>0.01 | 0.07<br>±<br>0.00 | 0.10<br>±<br>0.01 | 0.03<br>±<br>0.00 | <LOQ | <LOQ | 0.52<br>±<br>0.41 | 0.17<br>±<br>0.13 | <LOD | <LOD | <LOD | <LOD |
| <b>NP-14</b> | *                  | *                 | 0.15<br>±<br>0.02 | 0.05<br>±<br>0.01 | 0.07<br>±<br>0.02 | 0.02<br>±<br>0.01 | <LOQ | <LOQ | 0.33<br>±<br>0.24 | 0.11<br>±<br>0.08 | <LOD | <LOD | <LOD | <LOD |
| <b>NP-15</b> | *                  | *                 | 0.94<br>±<br>0.02 | 0.31<br>±<br>0.01 | 0.84<br>±<br>0.06 | 0.28<br>±<br>0.02 | <LOD | <LOD | 0.13<br>±<br>0.04 | 0.04<br>±<br>0.01 | <LOD | <LOD | <LOD | <LOD |
| <b>NP-16</b> | *                  | *                 | 0.14<br>±<br>0.01 | 0.04<br>±<br>0.00 | 0.11<br>±<br>0.00 | 0.03<br>±<br>0.00 | <LOD | <LOD | 0.15<br>±<br>0.07 | 0.04<br>±<br>0.02 | <LOD | <LOD | <LOD | <LOD |
| <b>NP-17</b> | *                  | *                 | 0.11<br>±<br>0.00 | 0.03<br>±<br>0.00 | 0.10<br>±<br>0.00 | 0.03<br>±<br>0.00 | <LOD | <LOD | 0.16<br>±<br>0.02 | 0.05<br>±<br>0.01 | <LOD | <LOD | <LOD | <LOD |
| <b>NP-18</b> | *                  | *                 | 0.14<br>±<br>0.01 | 0.04<br>±<br>0.00 | 0.08<br>±<br>0.03 | 0.02<br>±<br>0.01 | <LOD | <LOD | 0.20<br>±<br>0.10 | 0.06<br>±<br>0.03 | <LOD | <LOD | <LOD | <LOD |
| <b>NP-19</b> | *                  | *                 | 1.26<br>±<br>0.01 | 0.32<br>±<br>0.00 | 0.23<br>±<br>0.08 | 0.06<br>±<br>0.02 | <LOD | <LOD | 0.28<br>±<br>0.14 | 0.07<br>±<br>0.04 | <LOD | <LOD | <LOD | <LOD |
| <b>NP-20</b> | 15.46<br>±<br>1.62 | 3.71<br>±<br>0.39 | 2.31<br>±<br>0.05 | 0.55<br>±<br>0.01 | 0.29<br>±<br>0.01 | 0.07<br>±<br>0.00 | <LOD | <LOD | 0.35<br>±<br>0.05 | 0.08<br>±<br>0.01 | <LOD | <LOD | <LOD | <LOD |

|              |                    |                    |                   |                   |                   |                   |      |      |                   |                   |      |      |      |      |
|--------------|--------------------|--------------------|-------------------|-------------------|-------------------|-------------------|------|------|-------------------|-------------------|------|------|------|------|
| <b>NP-21</b> | 13.02<br>±<br>2.00 | 4.60<br>±<br>0.70  | 4.67<br>±<br>0.17 | 1.65<br>±<br>0.06 | 0.74<br>±<br>0.02 | 0.26<br>±<br>0.01 | <LOD | <LOD | 0.21<br>±<br>0.00 | 0.07<br>±<br>0.00 | <LOD | <LOD | <LOD | <LOD |
| <b>NP-22</b> | *                  | *                  | 2.65<br>±<br>0.08 | 0.64<br>±<br>0.02 | 0.34<br>±<br>0.04 | 0.08<br>±<br>0.01 | <LOD | <LOD | <LOQ              | <LOQ              | <LOD | <LOD | <LOD | <LOD |
| <b>NP-23</b> | *                  | *                  | 0.82<br>±<br>0.01 | 0.35<br>±<br>0.00 | 1.20<br>±<br>0.07 | 0.51<br>±<br>0.03 | <LOD | <LOD | 0.26<br>±<br>0.19 | 0.11<br>±<br>0.08 | <LOD | <LOD | <LOD | <LOD |
| <b>NP-24</b> | 14.17<br>±<br>4.48 | 6.22<br>±<br>1.97  | 1.39<br>±<br>0.00 | 0.61<br>±<br>0.00 | 0.82<br>±<br>0.07 | 0.36<br>±<br>0.03 | <LOD | <LOD | <LOD              | <LOD              | <LOD | <LOD | <LOD | <LOD |
| <b>NP-25</b> | 23.89<br>±<br>1.42 | 12.94<br>±<br>0.77 | 1.32<br>±<br>0.04 | 0.71<br>±<br>0.02 | 0.88<br>±<br>0.09 | 0.48<br>±<br>0.05 | <LOD | <LOD | 0.12<br>±<br>0.11 | 0.07<br>±<br>0.06 | <LOD | <LOD | <LOD | <LOD |
| <b>NP-26</b> | 17.39<br>±<br>4.98 | 8.87<br>±<br>2.54  | 1.78<br>±<br>0.02 | 0.90<br>±<br>0.01 | 0.93<br>±<br>0.07 | 0.48<br>±<br>0.03 | <LOD | <LOD | <LOD              | <LOD              | <LOD | <LOD | <LOD | <LOD |

|             | <b>Sr</b>         |                   | <b>Ti</b>         |                   | <b>Tl</b> |       | <b>Zn</b> |       |
|-------------|-------------------|-------------------|-------------------|-------------------|-----------|-------|-----------|-------|
|             | µg/g              | µg/NP             | µg/g              | µg/NP             | µg/g      | µg/NP | µg/g      | µg/NP |
| <b>NP-1</b> | 1.64<br>±<br>0.11 | 0.71<br>±<br>0.05 | 1.04<br>±<br>0.26 | 0.45<br>±<br>0.11 | <LOD      | <LOD  | *         | *     |
| <b>NP-2</b> | 1.66<br>±<br>0.08 | 0.53<br>±<br>0.03 | 2.43<br>±<br>0.17 | 0.78<br>±<br>0.05 | <LOD      | <LOD  | *         | *     |
| <b>NP-3</b> | 1.39<br>±<br>0.05 | 0.45<br>±<br>0.02 | 1.12<br>±<br>0.05 | 0.36<br>±<br>0.02 | <LOD      | <LOD  | *         | *     |
| <b>NP-4</b> | 1.54<br>±<br>0.02 | 0.48<br>±<br>0.01 | 0.68<br>±<br>0.05 | 0.21<br>±<br>0.02 | <LOD      | <LOD  | *         | *     |
| <b>NP-5</b> | 0.13              | 0.03              | 0.70              | 0.13              | <LOD      | <LOD  | *         | *     |

|              |                   |                   |                   |                   |      |      |   |   |
|--------------|-------------------|-------------------|-------------------|-------------------|------|------|---|---|
|              | ±<br>0.04         | ±<br>0.01         | ±<br>0.41         | ±<br>0.08         |      |      |   |   |
| <b>NP-6</b>  | 0.17<br>±<br>0.01 | 0.04<br>±<br>0.00 | 0.50<br>±<br>0.13 | 0.11<br>±<br>0.03 | <LOD | <LOD | * | * |
| <b>NP-7</b>  | 0.32<br>±<br>0.01 | 0.08<br>±<br>0.00 | 0.36<br>±<br>0.06 | 0.09<br>±<br>0.01 | <LOD | <LOD | * | * |
| <b>NP-8</b>  | 0.74<br>±<br>0.01 | 0.23<br>±<br>0.00 | 1.04<br>±<br>0.07 | 0.32<br>±<br>0.02 | <LOD | <LOD | * | * |
| <b>NP-9</b>  | 0.95<br>±<br>0.02 | 0.30<br>±<br>0.01 | 0.44<br>±<br>0.15 | 0.14<br>±<br>0.05 | <LOD | <LOD | * | * |
| <b>NP-10</b> | 1.06<br>±<br>0.01 | 0.30<br>±<br>0.00 | <LOQ              | <LOQ              | <LOD | <LOD | * | * |
| <b>NP-11</b> | 0.83<br>±<br>0.02 | 0.23<br>±<br>0.00 | 9.45<br>±<br>0.01 | 2.60<br>±<br>0.00 | <LOD | <LOD | * | * |
| <b>NP-12</b> | 0.13<br>±<br>0.04 | 0.04<br>±<br>0.01 | 0.32<br>±<br>0.08 | 0.10<br>±<br>0.02 | <LOD | <LOD | * | * |
| <b>NP-13</b> | 0.37<br>±<br>0.01 | 0.12<br>±<br>0.00 | 0.32<br>±<br>0.07 | 0.10<br>±<br>0.02 | <LOD | <LOD | * | * |
| <b>NP-14</b> | 0.11<br>±<br>0.00 | 0.04<br>±<br>0.00 | 0.21<br>±<br>0.02 | 0.07<br>±<br>0.01 | <LOD | <LOD | * | * |
| <b>NP-15</b> | 1.74<br>±<br>0.08 | 0.58<br>±<br>0.03 | 1.08<br>±<br>0.02 | 0.36<br>±<br>0.01 | <LOD | <LOD | * | * |
| <b>NP-16</b> | 2.05              | 0.59              | 0.83              | 0.24              | <LOD | <LOD | * | * |

|              |                   |                   |                   |                   |      |      |      |      |
|--------------|-------------------|-------------------|-------------------|-------------------|------|------|------|------|
|              | ±<br>0.11         | ±<br>0.03         | ±<br>0.13         | ±<br>0.04         |      |      |      |      |
| <b>NP-17</b> | 1.53<br>±<br>0.15 | 0.46<br>±<br>0.04 | 0.33<br>±<br>0.07 | 0.10<br>±<br>0.02 | <LOD | <LOD | *    | *    |
| <b>NP-18</b> | 0.91<br>±<br>0.02 | 0.27<br>±<br>0.01 | <LOQ              | <LOQ              | <LOD | <LOD | *    | *    |
| <b>NP-19</b> | 2.39<br>±<br>0.01 | 0.61<br>±<br>0.00 | 1.18<br>±<br>0.20 | 0.30<br>±<br>0.05 | <LOD | <LOD | *    | *    |
| <b>NP-20</b> | 4.74<br>±<br>0.00 | 1.14<br>±<br>0.00 | 0.84<br>±<br>0.15 | 0.20<br>±<br>0.04 | <LOD | <LOD | *    | *    |
| <b>NP-21</b> | 3.28<br>±<br>0.08 | 1.16<br>±<br>0.03 | 0.60<br>±<br>0.16 | 0.21<br>±<br>0.05 | <LOD | <LOD | *    | *    |
| <b>NP-22</b> | 4.70<br>±<br>0.03 | 1.13<br>±<br>0.01 | 0.45<br>±<br>0.18 | 0.11<br>±<br>0.04 | <LOD | <LOD | <LOD | <LOD |
| <b>NP-23</b> | 2.38<br>±<br>0.08 | 1.02<br>±<br>0.03 | 0.83<br>±<br>0.09 | 0.36<br>±<br>0.04 | <LOD | <LOD | <LOD | <LOD |
| <b>NP-24</b> | 2.42<br>±<br>0.09 | 1.06<br>±<br>0.04 | 0.70<br>±<br>0.02 | 0.31<br>±<br>0.01 | <LOD | <LOD | <LOD | <LOD |
| <b>NP-25</b> | 2.33<br>±<br>0.03 | 1.26<br>±<br>0.02 | 0.84<br>±<br>0.23 | 0.46<br>±<br>0.12 | <LOD | <LOD | <LOD | <LOD |
| <b>NP-26</b> | 2.71<br>±<br>0.02 | 1.38<br>±<br>0.01 | 1.82<br>±<br>0.51 | 0.93<br>±<br>0.26 | <LOD | <LOD | <LOQ | <LOQ |

\*Elemental content above LOQ, but below the first calibration point of the linear concentration range.

| Compound number                               | Compound name                                     | HS-1  | HS-2  | HS-3  | HS-4  | HS-5  | HS-6  | HS-7  | HS-8  | HS-9  | HS-10 | HS-11 | HS-12 | HS-13 | HS-14 | HS-15 | HS-16 | Number of samples where specific compound was identified |
|-----------------------------------------------|---------------------------------------------------|-------|-------|-------|-------|-------|-------|-------|-------|-------|-------|-------|-------|-------|-------|-------|-------|----------------------------------------------------------|
| 1                                             | acetic acid                                       | Green | 16                                                       |
| 2                                             | propylene glycol                                  | Green | 16                                                       |
| 3                                             | propylene glycol 1-acetate                        | White | Green | White | Green | Green | Green | Green | Green | Green | 14                                                       |
| 4                                             | glycerol                                          | Green | 16                                                       |
| 5                                             | benzyl alcohol                                    | Green | White | Green | White | White | Green | Green | 13                                                       |
| 6                                             | 1,2,3-propanetriol, 1-acetate                     | Green | 16                                                       |
| 7                                             | 2,3-dihydro-3,5-dihydroxy-6-methyl-4H-pyran-4-one | Green | White | 15                                                       |
| 8                                             | benzyl acetate                                    | Green | White | 1                                                        |
| 9                                             | menthol                                           | Green | 16                                                       |
| 10                                            | 5-ethyl-1,3-dioxane-5-methanol                    | White | Green | White | White | White | White | 5                                                        |
| 11                                            | dodecane                                          | Green | Green | White | Green | White | Green | Green | Green | Green | 13                                                       |
| 12                                            | <i>cis</i> -4- <i>tert</i> -butylcyclohexanol     | White | Green | White | White | White | White | 3                                                        |
| 13                                            | <i>trans</i> -4- <i>tert</i> -butylcyclohexanol   | White | Green | White | White | White | White | 9                                                        |
| 14                                            | glycerol 1,2-diacetate                            | Green | 16                                                       |
| 15                                            | nonanoic acid                                     | White | 1                                                        |
| 16                                            | triacetin                                         | Green | 16                                                       |
| 17                                            | nicotine                                          | Green | 16                                                       |
| 18                                            | hexadecane                                        | Green | 16                                                       |
| 19                                            | vanillin                                          | White | Green | White | White | White | White | 1                                                        |
| 20                                            | geranyl acetone                                   | Green | White | Green | White | Green | White | White | White | White | Green | White | White | White | White | White | White | 4                                                        |
| 21                                            | ethyl vanillin                                    | White | Green | White | White | White | White | 1                                                        |
| 22                                            | nicotyrine                                        | White | White | Green | White | 1                                                        |
| 23                                            | $\delta$ -decalactone                             | White | Green | White | 1                                                        |
| 24                                            | heptadecane                                       | White | Green | White | Green | Green | White | White | White | White | White | Green | White | Green | White | Green | Green | 7                                                        |
| 25                                            | neophytadiene                                     | Green | 16                                                       |
| Number of compounds identified in each sample |                                                   | 15    | 14    | 15    | 15    | 16    | 15    | 15    | 16    | 17    | 18    | 16    | 18    | 15    | 13    | 14    | 17    |                                                          |

Figure S1: Identified compounds in 16 HSs by non-targeted gas chromatography mass spectrometry (GC-MS) analysis. Green cells indicate samples in which specific compounds were identified, while white cells indicate that the compound was not identified in that sample.

| Compound number | Compound name                                     | HS-1                 | HS-2                 | HS-3                 | HS-4                 | HS-5                 | HS-6                 | HS-7                 | HS-8                 | HS-9                 | HS-10                | HS-11                | HS-12                | HS-13                | HS-14                | HS-15                | HS-16                |
|-----------------|---------------------------------------------------|----------------------|----------------------|----------------------|----------------------|----------------------|----------------------|----------------------|----------------------|----------------------|----------------------|----------------------|----------------------|----------------------|----------------------|----------------------|----------------------|
| 1               | acetic acid                                       | 0.12                 | 0.13                 | 0.16                 | 0.11                 | 0.11                 | 0.17                 | 0.23                 | 0.12                 | 0.16                 | 0.18                 | 0.23                 | 0.22                 | 0.32                 | 0.36                 | 0.30                 | 0.20                 |
| 2               | propylene glycol                                  | 0.55                 | 1.46                 | 1.16                 | 1.82                 | 1.67                 | 1.09                 | 1.29                 | 1.46                 | 1.70                 | 0.60                 | 1.85                 | 1.72                 | 1.73                 | 1.60                 | 1.72                 | 1.35                 |
| 3               | propylene glycol 1-acetate                        |                      | 0.12                 | 0.12                 | 0.13                 | 0.14                 | 0.10                 | 0.14                 | 0.11                 | 0.11                 |                      | 0.19                 | 0.14                 | 0.15                 | 0.15                 | 0.15                 | 0.11                 |
| 4               | glycerol                                          | 10.19                | 11.19                | 10.49                | 12.49                | 12.52                | 12.62                | 12.18                | 12.95                | 14.63                | 13.30                | 16.64                | 13.82                | 14.82                | 16.11                | 15.53                | 13.51                |
| 5               | benzyl alcohol                                    | 8.53                 |                      | 0.54                 | 1.67                 | 1.92                 | 0.72                 | 0.20                 | 0.13                 | 0.12                 | 7.36                 | 0.11                 | 2.23                 | 1.30                 |                      |                      | 0.20                 |
| 6               | 1,2,3-propanetriol, 1-acetate                     | 1.94                 | 2.31                 | 4.22                 | 2.10                 | 2.71                 | 3.06                 | 3.24                 | 3.31                 | 2.85                 | 2.77                 | 3.67                 | 2.79                 | 3.67                 | 4.11                 | 4.05                 | 3.71                 |
| 7               | 2,3-dihydro-3,5-dihydroxy-6-methyl-4H-pyran-4-one | 0.19                 | 0.22                 | 0.71                 | 0.18                 | 0.20                 | 0.29                 | 0.20                 | 0.25                 | 0.25                 | 0.20                 | 0.23                 | 0.19                 | 0.25                 | 0.21                 | 0.20                 |                      |
| 8               | benzyl acetate                                    | 0.58                 |                      |                      |                      |                      |                      |                      |                      |                      |                      |                      |                      |                      |                      |                      |                      |
| 9               | menthol                                           | 2.03                 | 18.48                | 0.94                 | 1.32                 | 0.74                 | 4.88                 | 20.41                | 0.44                 | 1.17                 | 0.52                 | 0.46                 | 0.29                 | 0.58                 | 0.44                 | 0.68                 | 0.28                 |
| 10              | 5-ethyl-1,3-dioxane-5-methanol                    |                      |                      |                      |                      |                      |                      |                      | 0.12                 | 0.11                 | 0.17                 |                      | 0.26                 |                      |                      |                      | 0.14                 |
| 11              | dodecane                                          | 0.24                 | 0.30                 |                      | 0.34                 | 0.32                 | 0.34                 | 0.17                 | 0.30                 | 0.35                 | 0.18                 | 0.21                 |                      | 0.21                 | 0.19                 |                      | 0.16                 |
| 12              | cis-4-tert-butylcyclohexanol                      |                      |                      |                      |                      |                      |                      |                      |                      |                      | 0.11                 |                      | 0.13                 |                      |                      |                      | 0.12                 |
| 13              | trans-4-tert-butylcyclohexanol                    |                      |                      |                      |                      |                      | 0.39                 | 0.24                 | 0.38                 | 0.37                 | 0.51                 | 0.41                 | 0.58                 |                      |                      | 0.31                 | 0.37                 |
| 14              | glycerol 1,2-diacetate                            | 4.29                 | 2.22                 | 3.60                 | 3.64                 | 4.01                 | 3.41                 | 1.32                 | 3.85                 | 3.26                 | 3.15                 | 3.10                 | 3.53                 | 1.73                 | 1.64                 | 1.98                 | 3.99                 |
| 15              | nonanoic acid                                     |                      |                      |                      |                      |                      |                      |                      |                      |                      | 0.15                 |                      |                      |                      |                      |                      |                      |
| 16              | triacetin                                         | 21.74                | 8.51                 | 7.96                 | 12.63                | 14.67                | 11.07                | 3.17                 | 11.47                | 12.87                | 12.48                | 13.11                | 13.64                | 5.90                 | 5.22                 | 6.30                 | 13.79                |
| 17              | nicotine                                          | 40.38                | 45.80                | 57.89                | 51.89                | 48.90                | 51.46                | 48.40                | 52.55                | 52.44                | 47.25                | 50.21                | 49.40                | 57.56                | 58.04                | 58.37                | 50.11                |
| 18              | hexadecane                                        | 0.47                 | 0.42                 | 0.36                 | 0.66                 | 0.58                 | 0.41                 | 0.32                 | 0.32                 | 0.51                 | 0.34                 | 0.53                 | 0.39                 | 0.48                 | 0.38                 | 0.47                 | 0.32                 |
| 19              | vanillin                                          |                      |                      |                      |                      |                      |                      |                      |                      |                      |                      |                      | 0.40                 |                      |                      |                      |                      |
| 20              | geranyl acetone                                   | 0.33                 |                      | 0.84                 |                      | 0.18                 |                      |                      |                      |                      | 0.19                 |                      |                      |                      |                      |                      |                      |
| 21              | ethyl vanillin                                    |                      |                      |                      |                      |                      |                      |                      |                      |                      |                      |                      | 0.39                 |                      |                      |                      |                      |
| 22              | nicotyrine                                        |                      |                      | 1.01                 |                      |                      |                      |                      |                      |                      |                      |                      |                      |                      |                      |                      |                      |
| 23              | δ-decalactone                                     |                      |                      |                      |                      |                      |                      |                      |                      | 0.35                 |                      |                      |                      |                      |                      |                      |                      |
| 24              | heptadecane                                       |                      | 0.22                 |                      | 0.48                 | 0.37                 |                      |                      |                      |                      |                      | 0.47                 |                      | 0.46                 |                      | 0.56                 | 0.32                 |
| 25              | neophytadiene                                     | 8.42                 | 8.62                 | 10.00                | 10.54                | 10.95                | 9.98                 | 8.49                 | 12.24                | 8.75                 | 10.52                | 8.58                 | 9.86                 | 10.85                | 11.55                | 9.38                 | 11.32                |
|                 | Total area of identified chromatographic peaks    | 4.21·10 <sup>7</sup> | 4.34·10 <sup>7</sup> | 3.75·10 <sup>7</sup> | 3.90·10 <sup>7</sup> | 3.70·10 <sup>7</sup> | 3.60·10 <sup>7</sup> | 4.18·10 <sup>7</sup> | 3.68·10 <sup>7</sup> | 3.30·10 <sup>7</sup> | 3.73·10 <sup>7</sup> | 3.44·10 <sup>7</sup> | 3.46·10 <sup>7</sup> | 3.48·10 <sup>7</sup> | 3.32·10 <sup>7</sup> | 3.40·10 <sup>7</sup> | 3.82·10 <sup>7</sup> |

Figure S2: Relative areas normalized to 100% of individual chromatographic peaks based on the total area of identified chromatographic peaks for every HS.

| Compound number | Compound name                          | NP-1 | NP-2 | NP-3 | NP-4 | NP-5 | NP-6 | NP-7 | NP-8 | NP-9 | NP-10 | NP-11 | NP-12 | NP-13 | NP-14 | NP-15 | NP-16 | NP-17 | NP-18 | NP-19 | NP-20 | NP-21 | NP-22 | NP-23 | NP-24 | NP-25 | NP-26 | Number of samples where specific compound was identified |    |
|-----------------|----------------------------------------|------|------|------|------|------|------|------|------|------|-------|-------|-------|-------|-------|-------|-------|-------|-------|-------|-------|-------|-------|-------|-------|-------|-------|----------------------------------------------------------|----|
| 1               | acetaldehyde                           |      |      |      |      |      |      |      |      |      |       |       |       |       |       |       |       |       |       |       |       |       |       |       |       |       |       | 6                                                        |    |
| 2               | ethanol                                |      |      |      |      |      |      |      |      |      |       |       |       |       |       |       |       |       |       |       |       |       |       |       |       |       |       |                                                          | 25 |
| 3               | acetonitrile                           |      |      |      |      |      |      |      |      |      |       |       |       |       |       |       |       |       |       |       |       |       |       |       |       |       |       |                                                          | 13 |
| 4               | 2-methyl-2-propanol                    |      |      |      |      |      |      |      |      |      |       |       |       |       |       |       |       |       |       |       |       |       |       |       |       |       |       |                                                          | 5  |
| 5               | 2-propen-1-ol                          |      |      |      |      |      |      |      |      |      |       |       |       |       |       |       |       |       |       |       |       |       |       |       |       |       |       |                                                          | 1  |
| 6               | ethenyl acetate                        |      |      |      |      |      |      |      |      |      |       |       |       |       |       |       |       |       |       |       |       |       |       |       |       |       |       |                                                          | 1  |
| 7               | hexane                                 |      |      |      |      |      |      |      |      |      |       |       |       |       |       |       |       |       |       |       |       |       |       |       |       |       |       |                                                          | 1  |
| 8               | ethyl acetate                          |      |      |      |      |      |      |      |      |      |       |       |       |       |       |       |       |       |       |       |       |       |       |       |       |       |       |                                                          | 1  |
| 9               | 2-methyl-1-propanol                    |      |      |      |      |      |      |      |      |      |       |       |       |       |       |       |       |       |       |       |       |       |       |       |       |       |       |                                                          | 2  |
| 10              | 1-butanol                              |      |      |      |      |      |      |      |      |      |       |       |       |       |       |       |       |       |       |       |       |       |       |       |       |       |       |                                                          | 21 |
| 11              | 3-methyl-1-butanol                     |      |      |      |      |      |      |      |      |      |       |       |       |       |       |       |       |       |       |       |       |       |       |       |       |       |       |                                                          | 3  |
| 12              | 2-methyl-1-butanol                     |      |      |      |      |      |      |      |      |      |       |       |       |       |       |       |       |       |       |       |       |       |       |       |       |       |       |                                                          | 2  |
| 13              | propylene glycol                       |      |      |      |      |      |      |      |      |      |       |       |       |       |       |       |       |       |       |       |       |       |       |       |       |       |       |                                                          | 18 |
| 14              | 1-pentanol                             |      |      |      |      |      |      |      |      |      |       |       |       |       |       |       |       |       |       |       |       |       |       |       |       |       |       |                                                          | 1  |
| 15              | isobutyl acetate                       |      |      |      |      |      |      |      |      |      |       |       |       |       |       |       |       |       |       |       |       |       |       |       |       |       |       |                                                          | 2  |
| 16              | ethyl butanoate                        |      |      |      |      |      |      |      |      |      |       |       |       |       |       |       |       |       |       |       |       |       |       |       |       |       |       |                                                          | 8  |
| 17              | butyl acetate                          |      |      |      |      |      |      |      |      |      |       |       |       |       |       |       |       |       |       |       |       |       |       |       |       |       |       |                                                          | 6  |
| 18              | 2,4-dimethyl-heptane                   |      |      |      |      |      |      |      |      |      |       |       |       |       |       |       |       |       |       |       |       |       |       |       |       |       |       |                                                          | 1  |
| 19              | ethyl 2-methylbutanoate                |      |      |      |      |      |      |      |      |      |       |       |       |       |       |       |       |       |       |       |       |       |       |       |       |       |       |                                                          | 8  |
| 20              | ethyl 3-methylbutanoate                |      |      |      |      |      |      |      |      |      |       |       |       |       |       |       |       |       |       |       |       |       |       |       |       |       |       |                                                          | 2  |
| 21              | cis -3-hexen-1-ol                      |      |      |      |      |      |      |      |      |      |       |       |       |       |       |       |       |       |       |       |       |       |       |       |       |       |       |                                                          | 11 |
| 22              | trans -2-hexen-1-ol                    |      |      |      |      |      |      |      |      |      |       |       |       |       |       |       |       |       |       |       |       |       |       |       |       |       |       |                                                          | 2  |
| 23              | 1-hexanol                              |      |      |      |      |      |      |      |      |      |       |       |       |       |       |       |       |       |       |       |       |       |       |       |       |       |       |                                                          | 4  |
| 24              | 3-methyl-1-butyl acetate               |      |      |      |      |      |      |      |      |      |       |       |       |       |       |       |       |       |       |       |       |       |       |       |       |       |       |                                                          | 2  |
| 25              | 2-methyl-1-butyl acetate               |      |      |      |      |      |      |      |      |      |       |       |       |       |       |       |       |       |       |       |       |       |       |       |       |       |       |                                                          | 2  |
| 26              | 2,5-diethyltetrahydrofuran             |      |      |      |      |      |      |      |      |      |       |       |       |       |       |       |       |       |       |       |       |       |       |       |       |       |       |                                                          | 1  |
| 27              | pentyl acetate                         |      |      |      |      |      |      |      |      |      |       |       |       |       |       |       |       |       |       |       |       |       |       |       |       |       |       |                                                          | 1  |
| 28              | α-thujene                              |      |      |      |      |      |      |      |      |      |       |       |       |       |       |       |       |       |       |       |       |       |       |       |       |       |       |                                                          | 2  |
| 29              | α-pinene                               |      |      |      |      |      |      |      |      |      |       |       |       |       |       |       |       |       |       |       |       |       |       |       |       |       |       |                                                          | 8  |
| 30              | camphene                               |      |      |      |      |      |      |      |      |      |       |       |       |       |       |       |       |       |       |       |       |       |       |       |       |       |       |                                                          | 3  |
| 31              | benzaldehyde                           |      |      |      |      |      |      |      |      |      |       |       |       |       |       |       |       |       |       |       |       |       |       |       |       |       |       |                                                          | 8  |
| 32              | 2,6,6-trimethyl-2-vinyltetrahydropyran |      |      |      |      |      |      |      |      |      |       |       |       |       |       |       |       |       |       |       |       |       |       |       |       |       |       |                                                          | 1  |
| 33              | sabinene                               |      |      |      |      |      |      |      |      |      |       |       |       |       |       |       |       |       |       |       |       |       |       |       |       |       |       |                                                          | 6  |
| 34              | 2,2,4-trimethyl-1,3-dioxolane          |      |      |      |      |      |      |      |      |      |       |       |       |       |       |       |       |       |       |       |       |       |       |       |       |       |       |                                                          | 1  |
| 35              | β-pinene                               |      |      |      |      |      |      |      |      |      |       |       |       |       |       |       |       |       |       |       |       |       |       |       |       |       |       |                                                          | 11 |
| 36              | sulcatone                              |      |      |      |      |      |      |      |      |      |       |       |       |       |       |       |       |       |       |       |       |       |       |       |       |       |       |                                                          | 2  |
| 37              | 3-octanone                             |      |      |      |      |      |      |      |      |      |       |       |       |       |       |       |       |       |       |       |       |       |       |       |       |       |       |                                                          | 1  |
| 38              | p-menth-3-ene                          |      |      |      |      |      |      |      |      |      |       |       |       |       |       |       |       |       |       |       |       |       |       |       |       |       |       |                                                          | 1  |
| 39              | β-myrcene                              |      |      |      |      |      |      |      |      |      |       |       |       |       |       |       |       |       |       |       |       |       |       |       |       |       |       |                                                          | 8  |
| 40              | butyl butanoate                        |      |      |      |      |      |      |      |      |      |       |       |       |       |       |       |       |       |       |       |       |       |       |       |       |       |       |                                                          | 1  |
| 41              | 3-octanol                              |      |      |      |      |      |      |      |      |      |       |       |       |       |       |       |       |       |       |       |       |       |       |       |       |       |       |                                                          | 10 |
| 42              | ethyl hexanoate                        |      |      |      |      |      |      |      |      |      |       |       |       |       |       |       |       |       |       |       |       |       |       |       |       |       |       |                                                          | 6  |
| 43              | 2,6-dimethyl-3-heptanone               |      |      |      |      |      |      |      |      |      |       |       |       |       |       |       |       |       |       |       |       |       |       |       |       |       |       |                                                          | 1  |
| 44              | cis -3-hexenyl acetate                 |      |      |      |      |      |      |      |      |      |       |       |       |       |       |       |       |       |       |       |       |       |       |       |       |       |       |                                                          | 7  |
| 45              | α-phellandrene                         |      |      |      |      |      |      |      |      |      |       |       |       |       |       |       |       |       |       |       |       |       |       |       |       |       |       |                                                          | 3  |

Figure S3: Identified compounds in 26 NPs by non-targeted GC-MS analysis (compound numbers 1–45). Green cells indicate samples in which specific compounds were identified, while white cells indicate that the compound was not identified in that sample.

| Compound number | Compound name                                        | NP-1 | NP-2 | NP-3 | NP-4 | NP-5 | NP-6 | NP-7 | NP-8 | NP-9 | NP-10 | NP-11 | NP-12 | NP-13 | NP-14 | NP-15 | NP-16 | NP-17 | NP-18 | NP-19 | NP-20 | NP-21 | NP-22 | NP-23 | NP-24 | NP-25 | NP-26 | Number of samples where specific compound was identified |    |
|-----------------|------------------------------------------------------|------|------|------|------|------|------|------|------|------|-------|-------|-------|-------|-------|-------|-------|-------|-------|-------|-------|-------|-------|-------|-------|-------|-------|----------------------------------------------------------|----|
| 46              | 3-carene                                             |      |      |      |      |      |      |      |      |      |       |       |       |       |       |       |       |       |       |       |       |       |       |       |       |       |       | 4                                                        |    |
| 47              | hexyl acetate                                        |      |      |      |      |      |      |      |      |      |       |       |       |       |       |       |       |       |       |       |       |       |       |       |       |       |       |                                                          | 8  |
| 48              | 2-ethyl-1-butanol                                    |      |      |      |      |      |      |      |      |      |       |       |       |       |       |       |       |       |       |       |       |       |       |       |       |       |       |                                                          | 1  |
| 49              | 1,4-cineole                                          |      |      |      |      |      |      |      |      |      |       |       |       |       |       |       |       |       |       |       |       |       |       |       |       |       |       |                                                          | 2  |
| 50              | $\alpha$ -terpinene                                  |      |      |      |      |      |      |      |      |      |       |       |       |       |       |       |       |       |       |       |       |       |       |       |       |       |       |                                                          | 6  |
| 51              | <i>o</i> -cymene                                     |      |      |      |      |      |      |      |      |      |       |       |       |       |       |       |       |       |       |       |       |       |       |       |       |       |       |                                                          | 8  |
| 52              | 2-ethyl-1-hexanol                                    |      |      |      |      |      |      |      |      |      |       |       |       |       |       |       |       |       |       |       |       |       |       |       |       |       |       |                                                          | 2  |
| 53              | D-limonene                                           |      |      |      |      |      |      |      |      |      |       |       |       |       |       |       |       |       |       |       |       |       |       |       |       |       |       |                                                          | 19 |
| 54              | benzyl alcohol                                       |      |      |      |      |      |      |      |      |      |       |       |       |       |       |       |       |       |       |       |       |       |       |       |       |       |       |                                                          | 6  |
| 55              | eucalyptol                                           |      |      |      |      |      |      |      |      |      |       |       |       |       |       |       |       |       |       |       |       |       |       |       |       |       |       |                                                          | 12 |
| 56              | 2,2-dimethyl-5-(1-methyl-1-propenyl)-tetrahydrofuran |      |      |      |      |      |      |      |      |      |       |       |       |       |       |       |       |       |       |       |       |       |       |       |       |       |       |                                                          | 1  |
| 57              | <i>cis</i> - $\beta$ -ocimene                        |      |      |      |      |      |      |      |      |      |       |       |       |       |       |       |       |       |       |       |       |       |       |       |       |       |       |                                                          | 2  |
| 58              | 2,6-dimethyl-5-heptenal                              |      |      |      |      |      |      |      |      |      |       |       |       |       |       |       |       |       |       |       |       |       |       |       |       |       |       |                                                          | 1  |
| 59              | 3-ethyl-3-methylheptane                              |      |      |      |      |      |      |      |      |      |       |       |       |       |       |       |       |       |       |       |       |       |       |       |       |       |       |                                                          | 10 |
| 60              | isopentyl butanoate                                  |      |      |      |      |      |      |      |      |      |       |       |       |       |       |       |       |       |       |       |       |       |       |       |       |       |       |                                                          | 1  |
| 61              | $\gamma$ -terpinene                                  |      |      |      |      |      |      |      |      |      |       |       |       |       |       |       |       |       |       |       |       |       |       |       |       |       |       |                                                          | 10 |
| 62              | 2,2,4-trimethyl-hexane                               |      |      |      |      |      |      |      |      |      |       |       |       |       |       |       |       |       |       |       |       |       |       |       |       |       |       |                                                          | 1  |
| 63              | acetophenone                                         |      |      |      |      |      |      |      |      |      |       |       |       |       |       |       |       |       |       |       |       |       |       |       |       |       |       |                                                          | 1  |
| 64              | 1-octanol                                            |      |      |      |      |      |      |      |      |      |       |       |       |       |       |       |       |       |       |       |       |       |       |       |       |       |       |                                                          | 1  |
| 65              | sabinene hydrate                                     |      |      |      |      |      |      |      |      |      |       |       |       |       |       |       |       |       |       |       |       |       |       |       |       |       |       |                                                          | 7  |
| 66              | 2-propenyl hexanoate                                 |      |      |      |      |      |      |      |      |      |       |       |       |       |       |       |       |       |       |       |       |       |       |       |       |       |       |                                                          | 2  |
| 67              | 4-carene                                             |      |      |      |      |      |      |      |      |      |       |       |       |       |       |       |       |       |       |       |       |       |       |       |       |       |       |                                                          | 5  |
| 68              | pentyl butanoate                                     |      |      |      |      |      |      |      |      |      |       |       |       |       |       |       |       |       |       |       |       |       |       |       |       |       |       |                                                          | 1  |
| 69              | ethyl heptanoate                                     |      |      |      |      |      |      |      |      |      |       |       |       |       |       |       |       |       |       |       |       |       |       |       |       |       |       |                                                          | 5  |
| 70              | linalool                                             |      |      |      |      |      |      |      |      |      |       |       |       |       |       |       |       |       |       |       |       |       |       |       |       |       |       |                                                          | 10 |
| 71              | $\alpha$ -methyl-benzeneacetaldehyde                 |      |      |      |      |      |      |      |      |      |       |       |       |       |       |       |       |       |       |       |       |       |       |       |       |       |       |                                                          | 1  |
| 72              | ( <i>e</i> )-4-methyl-2-(1-pentenyl)-1,3-dioxolane   |      |      |      |      |      |      |      |      |      |       |       |       |       |       |       |       |       |       |       |       |       |       |       |       |       |       |                                                          | 1  |
| 73              | isopentyl isopentanoate                              |      |      |      |      |      |      |      |      |      |       |       |       |       |       |       |       |       |       |       |       |       |       |       |       |       |       |                                                          | 4  |
| 74              | <i>trans</i> -rose oxide                             |      |      |      |      |      |      |      |      |      |       |       |       |       |       |       |       |       |       |       |       |       |       |       |       |       |       |                                                          | 2  |
| 75              | 3-octanyl acetate                                    |      |      |      |      |      |      |      |      |      |       |       |       |       |       |       |       |       |       |       |       |       |       |       |       |       |       |                                                          | 2  |
| 76              | fenchol                                              |      |      |      |      |      |      |      |      |      |       |       |       |       |       |       |       |       |       |       |       |       |       |       |       |       |       |                                                          | 2  |
| 77              | ethyl-3-hydroxyhexanoate                             |      |      |      |      |      |      |      |      |      |       |       |       |       |       |       |       |       |       |       |       |       |       |       |       |       |       |                                                          | 1  |
| 78              | <i>trans</i> -limonene oxide                         |      |      |      |      |      |      |      |      |      |       |       |       |       |       |       |       |       |       |       |       |       |       |       |       |       |       |                                                          | 1  |
| 79              | 1-terpineol                                          |      |      |      |      |      |      |      |      |      |       |       |       |       |       |       |       |       |       |       |       |       |       |       |       |       |       |                                                          | 1  |
| 80              | isopulegol                                           |      |      |      |      |      |      |      |      |      |       |       |       |       |       |       |       |       |       |       |       |       |       |       |       |       |       |                                                          | 4  |
| 81              | $\beta$ -terpineol                                   |      |      |      |      |      |      |      |      |      |       |       |       |       |       |       |       |       |       |       |       |       |       |       |       |       |       |                                                          | 2  |
| 82              | <i>p</i> -menthan-3-one                              |      |      |      |      |      |      |      |      |      |       |       |       |       |       |       |       |       |       |       |       |       |       |       |       |       |       |                                                          | 21 |
| 83              | benzyl acetate                                       |      |      |      |      |      |      |      |      |      |       |       |       |       |       |       |       |       |       |       |       |       |       |       |       |       |       |                                                          | 3  |
| 84              | menthofurane                                         |      |      |      |      |      |      |      |      |      |       |       |       |       |       |       |       |       |       |       |       |       |       |       |       |       |       |                                                          | 5  |
| 85              | isoborneol                                           |      |      |      |      |      |      |      |      |      |       |       |       |       |       |       |       |       |       |       |       |       |       |       |       |       |       |                                                          | 1  |
| 86              | ethyl benzoate                                       |      |      |      |      |      |      |      |      |      |       |       |       |       |       |       |       |       |       |       |       |       |       |       |       |       |       |                                                          | 1  |
| 87              | (1 <i>s</i> ,2 <i>r</i> ,5 <i>r</i> )-(+)-isomenthol |      |      |      |      |      |      |      |      |      |       |       |       |       |       |       |       |       |       |       |       |       |       |       |       |       |       |                                                          | 8  |
| 88              | borneol                                              |      |      |      |      |      |      |      |      |      |       |       |       |       |       |       |       |       |       |       |       |       |       |       |       |       |       |                                                          | 1  |
| 89              | ethyl 2,4-dimethyl-1,3-dioxolane-2-acetate           |      |      |      |      |      |      |      |      |      |       |       |       |       |       |       |       |       |       |       |       |       |       |       |       |       |       |                                                          | 2  |
| 90              | terpinen-4-ol                                        |      |      |      |      |      |      |      |      |      |       |       |       |       |       |       |       |       |       |       |       |       |       |       |       |       |       |                                                          | 6  |

Figure S4: Identified compounds in 26 NPs by non-targeted GC-MS analysis (compound numbers 46–90). Green cells indicate samples in which specific compounds were identified, while white cells indicate that the compound was not identified in that sample.

| Compound number | Compound name                                     | NP-1 | NP-2 | NP-3 | NP-4 | NP-5 | NP-6 | NP-7 | NP-8 | NP-9 | NP-10 | NP-11 | NP-12 | NP-13 | NP-14 | NP-15 | NP-16 | NP-17 | NP-18 | NP-19 | NP-20 | NP-21 | NP-22 | NP-23 | NP-24 | NP-25 | NP-26 | Number of samples where specific compound was identified |
|-----------------|---------------------------------------------------|------|------|------|------|------|------|------|------|------|-------|-------|-------|-------|-------|-------|-------|-------|-------|-------|-------|-------|-------|-------|-------|-------|-------|----------------------------------------------------------|
| 91              | menthol                                           | 1    | 1    | 1    | 1    | 1    | 1    | 1    | 1    | 1    | 1     | 1     | 1     | 1     | 1     | 1     | 1     | 1     | 1     | 1     | 1     | 1     | 1     | 1     | 1     | 1     | 1     | 25                                                       |
| 92              | 3-hexenyl butanoate                               |      |      |      |      |      |      |      |      |      |       |       |       |       |       |       |       |       |       |       | 1     |       |       |       |       |       |       | 1                                                        |
| 93              | $\alpha$ -methylbenzyl acetate                    |      |      |      |      |      |      |      |      |      |       |       |       |       |       |       |       |       |       |       | 1     |       |       |       |       |       |       | 1                                                        |
| 94              | hexyl butanoate                                   |      |      |      |      |      |      |      |      |      |       |       |       |       |       |       |       |       |       |       | 1     |       |       |       |       |       |       | 1                                                        |
| 95              | dihydroterpineol                                  |      |      | 1    | 1    |      |      |      |      |      |       |       |       |       |       |       |       |       |       |       |       |       |       |       |       |       |       | 2                                                        |
| 96              | $\alpha$ -terpineol                               |      |      | 1    | 1    |      |      |      |      |      | 1     |       |       |       |       | 1     |       |       |       |       |       | 1     |       | 1     |       |       |       | 6                                                        |
| 97              | <i>trans</i> -dihydrocarvone                      | 1    | 1    |      |      |      |      | 1    |      |      |       |       |       |       |       | 1     |       |       |       |       |       |       |       |       |       |       | 1     | 5                                                        |
| 98              | $\gamma$ -terpineol                               |      |      |      |      |      |      |      |      |      | 1     |       |       |       |       |       |       |       |       |       |       | 1     |       | 1     |       |       |       | 3                                                        |
| 99              | <i>cis</i> -carveol                               |      |      |      |      |      |      |      |      |      |       |       |       |       |       | 1     |       |       |       |       |       |       |       | 1     |       |       |       | 1                                                        |
| 100             | benzaldehyde diethyl acetal                       |      |      |      |      |      |      |      |      |      |       |       |       |       |       |       |       |       |       |       |       |       |       | 1     |       |       |       | 1                                                        |
| 101             | 3-phenylpropanol                                  |      |      |      |      |      |      |      |      |      |       |       |       |       |       |       |       |       |       |       |       | 1     |       |       |       |       |       | 1                                                        |
| 102             | <i>cis</i> -3-hexenyl pentanoate                  |      |      |      | 1    |      |      |      |      |      |       |       |       |       |       |       |       |       |       |       |       |       |       |       |       |       |       | 1                                                        |
| 103             | pulegone                                          | 1    |      | 1    | 1    |      |      |      |      |      | 1     |       |       | 1     | 1     | 1     |       |       |       |       |       |       |       |       |       |       | 1     | 8                                                        |
| 104             | D-carvone                                         | 1    | 1    | 1    | 1    | 1    | 1    | 1    | 1    | 1    | 1     | 1     | 1     | 1     | 1     | 1     | 1     | 1     | 1     | 1     | 1     | 1     | 1     | 1     | 1     | 1     | 1     | 24                                                       |
| 105             | ethyl 2-octenoate                                 |      |      |      |      |      |      |      |      |      |       |       |       |       |       |       |       |       |       |       | 1     |       |       |       |       |       |       | 1                                                        |
| 106             | linalyl acetate                                   |      |      |      |      |      |      |      |      |      |       |       |       |       |       |       |       |       | 1     |       |       |       |       |       |       |       |       | 1                                                        |
| 107             | 4-methoxy-benzaldehyde                            |      |      |      |      |      |      |      |      |      |       |       |       |       |       |       |       |       |       |       |       | 1     |       | 1     |       |       |       | 2                                                        |
| 108             | piperitone                                        | 1    | 1    | 1    | 1    |      |      | 1    | 1    |      | 1     |       |       |       |       | 1     |       |       |       |       |       |       |       |       |       |       | 1     | 9                                                        |
| 109             | 4-methyl-2-phenyl-1,3-dioxolane                   |      |      |      |      |      |      |      |      |      |       |       |       |       |       |       |       |       |       |       | 1     |       |       |       |       |       |       | 1                                                        |
| 110             | 2-hydroxy-3-isopropyl-6-methyl-2-cyclohexen-1-one |      |      |      |      |      |      |      |      |      |       | 1     |       |       |       |       |       |       |       |       |       |       |       |       |       |       |       | 1                                                        |
| 111             | citral                                            |      |      |      |      |      |      |      |      |      |       | 1     |       |       |       |       |       |       |       |       |       | 1     |       |       |       |       |       | 2                                                        |
| 112             | cinnamaldehyde                                    |      |      |      |      |      |      |      |      |      |       |       |       |       |       |       |       |       |       |       |       |       |       |       |       |       |       | 1                                                        |
| 113             | dodecane, 4,6-dimethyl                            |      |      |      |      |      | 1    | 1    |      |      |       |       |       |       |       | 1     |       |       |       |       | 1     | 1     | 1     | 1     | 1     | 1     | 1     | 12                                                       |
| 114             | bornyl acetate                                    |      |      |      |      |      |      |      |      |      | 1     |       |       | 1     | 1     | 1     |       |       |       |       |       |       |       |       |       |       |       | 3                                                        |
| 115             | anethole                                          |      |      |      |      |      |      |      |      |      |       |       |       |       |       | 1     |       |       |       |       |       |       |       |       |       |       |       | 1                                                        |
| 116             | menthyl acetate                                   | 1    |      | 1    | 1    | 1    | 1    | 1    | 1    | 1    | 1     | 1     | 1     | 1     | 1     | 1     | 1     | 1     | 1     | 1     | 1     | 1     | 1     | 1     | 1     | 1     | 1     | 16                                                       |
| 117             | 2,4-dimethyl-1,3-dioxolane-2-propionate           |      |      |      |      |      |      |      |      |      |       |       |       |       |       |       |       |       |       |       |       |       |       |       |       |       |       | 1                                                        |
| 118             | 2-hydroxypiperitone                               |      |      |      |      |      |      |      |      |      |       | 1     |       |       |       |       |       |       |       |       |       |       |       |       |       |       |       | 1                                                        |
| 119             | $\alpha,\alpha$ -dimethylphenethyl acetate        |      |      |      |      |      |      |      |      |      |       |       |       |       |       |       | 1     |       |       |       |       |       |       |       |       |       |       | 1                                                        |
| 120             | dihydrocarvyl acetate                             | 1    | 1    |      |      |      |      |      | 1    |      |       |       |       |       |       | 1     |       |       |       |       |       |       |       |       |       |       | 1     | 6                                                        |
| 121             | piperonal                                         |      |      |      |      |      |      |      |      |      |       |       |       |       |       |       |       |       |       |       |       | 1     |       |       |       |       |       | 1                                                        |
| 122             | $\delta$ -elemene                                 |      |      |      | 1    |      |      |      |      |      |       |       |       |       |       |       |       |       |       |       |       |       |       |       |       |       |       | 1                                                        |
| 123             | butyl 2-ethyl hexanoate                           |      |      |      |      |      |      |      |      |      |       |       |       |       |       |       |       |       |       |       | 1     |       |       |       |       |       |       | 1                                                        |
| 124             | nicotine                                          | 1    | 1    | 1    | 1    | 1    | 1    | 1    | 1    | 1    | 1     | 1     | 1     | 1     | 1     | 1     | 1     | 1     | 1     | 1     | 1     | 1     | 1     | 1     | 1     | 1     | 1     | 26                                                       |
| 125             | eugenol                                           |      |      |      |      |      |      |      |      |      |       |       |       |       |       |       |       |       |       |       |       | 1     |       |       |       |       |       | 1                                                        |
| 126             | nerol acetate                                     |      |      |      |      |      |      |      |      |      |       |       |       |       |       |       |       |       |       |       |       | 1     |       |       | 1     |       |       | 2                                                        |
| 127             | <i>trans</i> -carveyl acetate                     | 1    | 1    |      |      |      |      |      |      |      |       |       |       |       |       |       |       |       |       |       | 1     |       |       |       |       |       |       | 3                                                        |
| 128             | $\alpha$ -copaene                                 |      |      |      | 1    |      |      |      |      |      |       |       |       |       |       |       |       |       |       |       |       |       |       |       |       |       |       | 1                                                        |
| 129             | <i>cis</i> -3-hexenyl hexanoate                   |      |      |      |      |      |      |      |      |      |       |       |       |       |       |       |       |       |       |       | 1     |       | 1     |       |       |       |       | 2                                                        |
| 130             | $\beta$ -damascenone                              |      |      |      |      |      |      |      |      |      |       | 1     |       |       |       |       |       |       |       |       |       |       |       | 1     |       |       |       | 2                                                        |
| 131             | hexyl hexanoate                                   |      |      |      |      |      |      |      |      |      |       |       |       |       |       |       |       |       |       |       | 1     | 1     |       |       |       |       |       | 2                                                        |
| 132             | methyl cinnamate                                  |      |      |      |      |      |      |      |      |      |       |       |       |       |       | 1     |       |       |       |       |       | 1     |       |       |       |       |       | 2                                                        |
| 133             | $\beta$ -bourbonene                               | 1    | 1    | 1    | 1    |      |      | 1    | 1    | 1    | 1     | 1     | 1     | 1     | 1     | 1     | 1     | 1     | 1     | 1     | 1     | 1     | 1     | 1     | 1     | 1     | 1     | 8                                                        |
| 134             | $\beta$ -elemene                                  |      |      |      | 1    |      |      |      |      |      |       |       |       |       |       |       |       |       |       |       |       |       |       |       |       |       | 1     | 2                                                        |
| 135             | ethyl decanoate                                   |      |      |      |      |      |      |      |      |      |       |       |       |       |       |       |       |       |       |       |       |       |       | 1     |       |       |       | 1                                                        |

Figure S5: Identified compounds in all 26 NPs by non-targeted GC-MS analysis (compound numbers 91–135). Green cells indicate samples in which specific compounds were identified, while white cells indicate that the compound was not identified in that sample.

| Compound number                               | Compound name                    | NP-1 | NP-2 | NP-3 | NP-4 | NP-5 | NP-6 | NP-7 | NP-8 | NP-9 | NP-10 | NP-11 | NP-12 | NP-13 | NP-14 | NP-15 | NP-16 | NP-17 | NP-18 | NP-19 | NP-20 | NP-21 | NP-22 | NP-23 | NP-24 | NP-25 | NP-26 | Number of samples where specific compound was identified |    |
|-----------------------------------------------|----------------------------------|------|------|------|------|------|------|------|------|------|-------|-------|-------|-------|-------|-------|-------|-------|-------|-------|-------|-------|-------|-------|-------|-------|-------|----------------------------------------------------------|----|
| 136                                           | diphenyl ether                   |      |      |      |      |      |      |      |      |      |       |       |       |       |       |       |       |       |       |       |       |       |       |       |       |       |       | 1                                                        |    |
| 137                                           | $\beta$ -damascone               |      |      |      |      |      |      |      |      |      |       |       |       |       |       |       |       |       |       |       |       |       |       |       |       |       |       |                                                          | 7  |
| 138                                           | p-methoxybenzyl acetate          |      |      |      |      |      |      |      |      |      |       |       |       |       |       |       |       |       |       |       |       |       |       |       |       |       |       |                                                          | 2  |
| 139                                           | $\alpha$ -ionone                 |      |      |      |      |      |      |      |      |      |       |       |       |       |       |       |       |       |       |       |       |       |       |       |       |       |       |                                                          | 2  |
| 140                                           | $\beta$ -caryophyllene           |      |      |      |      |      |      |      |      |      |       |       |       |       |       |       |       |       |       |       |       |       |       |       |       |       |       |                                                          | 14 |
| 141                                           | 3-allylcyclohexyl propionate     |      |      |      |      |      |      |      |      |      |       |       |       |       |       |       |       |       |       |       |       |       |       |       |       |       |       |                                                          | 1  |
| 142                                           | trans- $\alpha$ -bergamotene     |      |      |      |      |      |      |      |      |      |       |       |       |       |       |       |       |       |       |       |       |       |       |       |       |       |       |                                                          | 4  |
| 143                                           | $\beta$ -copaene                 |      |      |      |      |      |      |      |      |      |       |       |       |       |       |       |       |       |       |       |       |       |       |       |       |       |       |                                                          | 2  |
| 144                                           | cinnamyl acetate                 |      |      |      |      |      |      |      |      |      |       |       |       |       |       |       |       |       |       |       |       |       |       |       |       |       |       |                                                          | 1  |
| 145                                           | $\beta$ -farnesene               |      |      |      |      |      |      |      |      |      |       |       |       |       |       |       |       |       |       |       |       |       |       |       |       |       |       |                                                          | 6  |
| 146                                           | $\alpha$ -caryophyllene          |      |      |      |      |      |      |      |      |      |       |       |       |       |       |       |       |       |       |       |       |       |       |       |       |       |       |                                                          | 2  |
| 147                                           | 5-hexyldihydro-2(3h)-furanone    |      |      |      |      |      |      |      |      |      |       |       |       |       |       |       |       |       |       |       |       |       |       |       |       |       |       |                                                          | 3  |
| 148                                           | ethyl cinnamate                  |      |      |      |      |      |      |      |      |      |       |       |       |       |       |       |       |       |       |       |       |       |       |       |       |       |       |                                                          | 1  |
| 149                                           | $\beta$ -ionone                  |      |      |      |      |      |      |      |      |      |       |       |       |       |       |       |       |       |       |       |       |       |       |       |       |       |       |                                                          | 9  |
| 150                                           | $\alpha$ -curcumene              |      |      |      |      |      |      |      |      |      |       |       |       |       |       |       |       |       |       |       |       |       |       |       |       |       |       |                                                          | 1  |
| 151                                           | heneisocane                      |      |      |      |      |      |      |      |      |      |       |       |       |       |       |       |       |       |       |       |       |       |       |       |       |       |       |                                                          | 12 |
| 152                                           | germacrene D                     |      |      |      |      |      |      |      |      |      |       |       |       |       |       |       |       |       |       |       |       |       |       |       |       |       |       |                                                          | 5  |
| 153                                           | 2-phenylethyl-3-methyl butanoate |      |      |      |      |      |      |      |      |      |       |       |       |       |       |       |       |       |       |       |       |       |       |       |       |       |       |                                                          | 1  |
| 154                                           | $\alpha$ -zingiberene            |      |      |      |      |      |      |      |      |      |       |       |       |       |       |       |       |       |       |       |       |       |       |       |       |       |       |                                                          | 1  |
| 155                                           | $\beta$ -selinene                |      |      |      |      |      |      |      |      |      |       |       |       |       |       |       |       |       |       |       |       |       |       |       |       |       |       |                                                          | 1  |
| 156                                           | $\alpha$ -farnesene              |      |      |      |      |      |      |      |      |      |       |       |       |       |       |       |       |       |       |       |       |       |       |       |       |       |       |                                                          | 2  |
| 157                                           | bicyclgermacrene                 |      |      |      |      |      |      |      |      |      |       |       |       |       |       |       |       |       |       |       |       |       |       |       |       |       |       |                                                          | 1  |
| 158                                           | $\alpha$ -gualene                |      |      |      |      |      |      |      |      |      |       |       |       |       |       |       |       |       |       |       |       |       |       |       |       |       |       |                                                          | 1  |
| 159                                           | $\beta$ -bisabolene              |      |      |      |      |      |      |      |      |      |       |       |       |       |       |       |       |       |       |       |       |       |       |       |       |       |       |                                                          | 3  |
| 160                                           | $\beta$ -cadinene                |      |      |      |      |      |      |      |      |      |       |       |       |       |       |       |       |       |       |       |       |       |       |       |       |       |       |                                                          | 2  |
| 161                                           | $\beta$ -sesquiphellandrene      |      |      |      |      |      |      |      |      |      |       |       |       |       |       |       |       |       |       |       |       |       |       |       |       |       |       |                                                          | 1  |
| 162                                           | 5-heptyldihydro-2(3h)-furanone   |      |      |      |      |      |      |      |      |      |       |       |       |       |       |       |       |       |       |       |       |       |       |       |       |       |       |                                                          | 3  |
| 163                                           | N-ethyl-p-menthane-3-carboxamide |      |      |      |      |      |      |      |      |      |       |       |       |       |       |       |       |       |       |       |       |       |       |       |       |       |       |                                                          | 3  |
| Number of compounds identified in each sample |                                  | 43   | 36   | 32   | 56   | 15   | 20   | 19   | 23   | 14   | 19    | 24    | 12    | 23    | 15    | 27    | 23    | 20    | 12    | 57    | 62    | 32    | 43    | 26    | 18    | 30    | 10    |                                                          |    |

Figure S6: Identified compounds in all 26 NPs by non-targeted GC-MS analysis (compound numbers 136–163). Green cells indicate samples in which specific compounds were identified, while white cells indicate that the compound was not identified in that sample.

| Compound number | Compound name                        | NP-1 | NP-2  | NP-3 | NP-4 | NP-5 | NP-6 | NP-7 | NP-8 | NP-9 | NP-10 | NP-11 | NP-12 | NP-13 | NP-14 | NP-15 | NP-16 | NP-17 | NP-18 | NP-19 | NP-20 | NP-21 | NP-22 | NP-23 | NP-24 | NP-25 | NP-26 |      |
|-----------------|--------------------------------------|------|-------|------|------|------|------|------|------|------|-------|-------|-------|-------|-------|-------|-------|-------|-------|-------|-------|-------|-------|-------|-------|-------|-------|------|
| 1               | acetaldehyde                         | 0.06 | 0.09  | 0.05 | 0.03 |      |      |      |      |      |       |       |       |       |       |       |       |       |       | 0.04  |       | 0.11  |       |       |       |       |       |      |
| 2               | ethanol                              | 9.32 | 11.35 | 6.27 | 4.63 | 7.10 | 1.23 | 0.46 | 0.76 | 8.16 | 0.91  |       | 0.64  | 0.27  | 0.33  | 0.37  | 2.10  | 0.19  | 0.24  | 0.44  | 0.99  | 15.11 | 13.24 | 9.77  | 9.64  | 6.95  | 5.61  |      |
| 3               | acetonitrile                         | 0.28 | 0.35  |      | 0.12 | 0.41 | 0.27 | 0.10 | 0.30 |      |       |       |       | 0.09  |       | 0.13  | 1.63  | 0.07  |       |       | 1.11  |       |       |       |       | 0.11  |       |      |
| 4               | 2-methyl-2-propanol                  | 0.07 | 0.08  |      | 0.03 |      |      |      |      |      |       |       | 0.10  | 0.06  |       |       |       |       |       |       |       |       |       |       |       |       |       |      |
| 5               | 2-propen-1-ol                        |      |       |      |      |      |      |      |      |      |       |       |       |       |       |       |       |       |       |       | 0.03  |       |       |       |       |       |       |      |
| 6               | ethenyl acetate                      |      |       |      |      |      |      |      |      |      |       |       |       |       |       |       |       |       |       |       |       |       |       |       | 0.02  |       |       |      |
| 7               | hexane                               |      |       |      | 0.02 |      |      |      |      |      |       |       |       |       |       |       |       |       |       |       |       |       |       |       |       |       |       |      |
| 8               | ethyl acetate                        |      |       |      |      |      |      |      |      |      |       |       |       |       |       |       |       |       |       |       |       |       |       | 0.04  |       |       |       |      |
| 9               | 2-methyl-1-propanol                  |      |       |      |      |      |      |      |      |      |       |       |       |       |       |       |       |       |       |       |       | 0.10  | 0.28  |       |       |       |       |      |
| 10              | 1-butanol                            |      |       |      |      | 1.26 | 0.66 | 0.45 | 0.38 | 1.70 | 0.14  | 0.35  | 0.53  | 0.09  | 0.14  | 0.04  | 0.50  | 0.04  |       |       | 0.10  | 0.23  | 0.74  | 0.16  | 0.10  | 0.14  | 0.17  | 0.18 |
| 11              | 3-methyl-1-butanol                   |      |       |      | 0.01 |      |      |      |      |      |       |       |       |       |       |       |       |       |       |       | 0.12  |       |       | 0.36  |       |       |       |      |
| 12              | 2-methyl-1-butanol                   |      |       |      |      |      |      |      |      |      |       |       |       |       |       |       |       |       |       |       | 0.03  |       |       | 0.08  |       |       |       |      |
| 13              | propylene glycol                     |      | 0.04  | 0.04 | 0.05 | 0.85 | 1.23 | 0.69 | 0.36 | 0.88 |       | 0.22  | 3.06  | 0.08  | 0.04  |       | 0.24  | 0.40  |       |       | 0.04  |       | 0.05  | 0.22  | 0.34  |       |       |      |
| 14              | 1-pentanol                           |      |       |      |      |      |      |      |      |      |       |       |       |       |       |       |       |       |       |       | 1.92  |       |       |       |       |       |       |      |
| 15              | isobutyl acetate                     |      |       |      |      |      |      |      |      |      |       |       |       |       |       |       |       |       |       |       |       | 0.40  | 0.15  |       |       |       |       |      |
| 16              | ethyl butanoate                      | 0.05 | 0.05  |      |      |      |      |      | 0.08 | 0.51 |       |       |       |       |       |       |       |       |       |       | 1.02  |       | 2.03  | 2.99  | 0.06  |       |       |      |
| 17              | butyl acetate                        | 0.02 | 0.03  |      | 0.01 |      |      |      |      |      |       |       |       |       |       |       |       |       |       |       | 0.03  | 1.37  | 0.35  |       |       |       |       |      |
| 18              | 2,4-dimethyl-heptane                 |      |       | 0.01 |      |      |      |      |      |      |       |       |       |       |       |       |       |       |       |       |       |       |       |       |       |       |       |      |
| 19              | ethyl 2-methylbutanoate              | 0.03 | 0.02  |      | 0.01 |      |      |      |      | 0.14 |       |       |       |       |       |       |       |       |       |       | 0.40  |       | 1.73  | 3.84  | 0.04  |       |       |      |
| 20              | ethyl 3-methylbutanoate              |      |       |      |      |      |      |      |      |      |       |       |       |       |       |       |       |       |       |       | 1.38  |       |       |       | 0.12  |       |       |      |
| 21              | cis-3-hexen-1-ol                     |      |       |      |      | 1.53 | 0.31 |      | 0.39 | 1.97 |       | 3.16  | 0.84  |       |       |       | 2.37  |       |       |       | 0.94  | 1.98  | 13.65 |       | 0.06  |       |       |      |
| 22              | trans-2-hexen-1-ol                   |      |       |      |      |      |      |      |      |      |       |       |       |       |       |       |       |       |       |       |       |       | 3.18  |       | 0.05  |       |       |      |
| 23              | 1-hexanol                            |      |       |      |      |      |      |      |      |      |       |       |       |       |       |       | 1.38  |       |       |       | 2.70  |       | 11.33 | 3.38  |       |       |       |      |
| 24              | 3-methyl-1-butyl acetate             |      |       |      |      |      |      |      |      |      |       |       |       |       |       |       |       |       |       |       | 1.57  |       |       | 3.15  |       |       |       |      |
| 25              | 2-methyl-1-butyl acetate             |      |       |      |      |      |      |      |      |      |       |       |       |       |       |       |       |       |       |       | 0.53  |       |       | 0.91  |       |       |       |      |
| 26              | 2,5-pentyl acetate                   |      |       |      | 0.01 |      |      |      |      |      |       |       |       |       |       |       |       |       |       |       |       |       |       |       |       |       |       |      |
| 27              | α-thujene                            |      |       |      | 0.12 |      |      |      |      |      |       |       |       |       |       |       |       |       |       |       |       | 0.01  |       |       |       |       |       |      |
| 28              | α-pinene                             | 0.10 | 0.07  | 0.13 | 2.49 |      |      |      |      |      |       |       |       | 0.06  |       |       |       |       |       |       | 0.56  | 0.31  |       |       |       | 0.24  |       |      |
| 30              | camphene                             |      |       |      | 0.06 |      |      |      |      |      |       |       |       | 0.05  |       |       |       |       |       |       |       |       | 0.04  |       |       |       |       |      |
| 31              | benzaldehyde                         | 0.02 | 0.03  |      | 0.01 |      |      |      |      |      |       |       |       |       |       |       |       |       |       |       |       |       |       |       |       |       |       |      |
| 32              | 2,6,6-trimethyl-2-vinylnorbornane    |      |       |      |      |      |      |      |      |      |       |       |       |       |       |       |       |       |       |       |       |       |       |       |       |       |       |      |
| 33              | sabinene                             | 0.11 | 0.13  | 0.05 | 2.84 |      |      |      |      |      |       |       |       |       |       |       |       |       |       |       |       | 0.04  |       |       |       |       |       |      |
| 34              | 2,2,4-trimethyl-1,3-β-pinene         | 0.31 | 0.23  | 0.28 | 4.03 |      |      |      |      |      | 0.03  |       |       |       |       |       | 0.26  |       |       |       | 0.02  | 2.77  |       | 0.42  |       | 0.03  |       |      |
| 36              | sulcatone                            |      |       |      |      |      |      |      |      |      |       | 0.11  |       |       |       |       |       |       |       |       |       |       | 0.07  |       |       |       |       |      |
| 37              | 3-octanone                           |      | 0.11  |      |      |      |      |      |      |      |       |       |       |       |       |       |       |       |       |       |       |       |       |       |       |       |       |      |
| 38              | p-menth-3-ene                        |      |       |      | 0.04 |      |      |      |      |      |       |       |       |       |       |       |       |       |       |       |       |       |       |       |       |       |       |      |
| 39              | β-myrcene                            | 0.32 | 0.72  | 0.03 | 0.39 |      |      |      |      |      |       |       |       |       |       |       |       |       |       |       |       |       |       |       |       |       |       |      |
| 40              | butyl butanoate                      |      |       |      |      |      |      |      |      |      |       |       |       |       |       |       |       |       |       |       |       | 0.17  | 1.22  |       | 0.20  |       | 0.04  |      |
| 41              | 3-octanol                            | 0.26 | 0.24  | 0.12 | 0.08 |      | 0.21 | 0.20 | 0.32 |      |       |       |       | 0.02  |       | 1.43  |       |       |       |       |       | 0.02  |       |       |       |       | 0.40  |      |
| 42              | ethyl hexanoate                      |      |       |      |      |      |      |      |      |      |       | 1.75  |       |       |       |       |       |       |       |       |       | 6.51  | 0.02  | 9.23  | 0.16  | 0.08  |       |      |
| 43              | 2,6-dimethyl-3-cis-3-hexenyl acetate |      |       |      | 0.03 |      |      |      |      |      |       |       |       |       |       |       |       |       |       |       |       |       |       |       |       |       |       |      |
| 44              | cis-3-hexenyl acetate                |      |       |      |      |      |      |      | 0.37 |      |       | 0.83  |       |       |       |       | 1.52  |       |       |       | 1.82  | 0.13  | 0.07  |       | 0.08  |       |       |      |
| 45              | α-phellandrene                       |      |       |      | 0.21 |      |      |      |      |      |       |       |       |       |       |       |       |       |       |       |       | 0.13  |       |       |       | 0.04  |       |      |

Figure S7: Relative areas normalized to 100% of individual chromatographic peaks based on the total area of identified chromatographic peaks for every NP (compound numbers 1–45).



|     |                                                |       |       |       |       |       |       |       |       |       |       |       |       |       |       |       |       |       |       |      |       |      |      |       |       |       |       |       |       |
|-----|------------------------------------------------|-------|-------|-------|-------|-------|-------|-------|-------|-------|-------|-------|-------|-------|-------|-------|-------|-------|-------|------|-------|------|------|-------|-------|-------|-------|-------|-------|
| 91  | menthol                                        | 19.52 | 0.23  | 42.89 | 25.40 | 2.67  | 26.38 | 26.90 | 33.26 | 0.68  | 67.03 | 41.48 | 0.59  | 60.95 | 64.61 | 23.45 | 0.42  | 57.49 | 87.35 | 0.09 | 0.19  |      | 0.25 | 70.57 | 58.72 | 68.72 | 81.78 |       |       |
| 92  | 3-hexenyl butanoate                            |       |       |       |       |       |       |       |       |       |       |       |       |       |       |       |       |       |       |      | 3.98  |      |      |       |       |       |       |       |       |
| 93  | α-methylbenzyl acetate                         |       |       |       |       |       |       |       |       |       |       |       |       |       |       |       |       |       |       |      | 1.04  |      |      |       |       |       |       |       |       |
| 94  | hexyl butanoate                                |       |       |       |       |       |       |       |       |       |       |       |       |       |       |       |       |       |       |      | 14.01 |      |      |       |       |       |       |       |       |
| 95  | dihydroterpineol                               |       |       | 0.07  | 0.03  |       |       |       |       |       |       |       |       |       |       |       |       |       |       |      |       |      |      |       |       |       |       |       |       |
| 96  | α-terpineol                                    |       |       | 0.08  | 0.11  |       |       |       |       |       |       | 2.75  |       |       |       |       | 0.18  |       |       |      |       | 3.35 |      | 2.42  |       |       |       |       |       |
| 97  | trans-dihydrocarvone                           | 0.42  | 0.86  |       |       |       |       | 0.28  |       |       |       |       |       |       |       | 1.69  |       |       |       |      |       |      |      |       |       |       | 0.18  |       |       |
| 98  | γ-terpineol                                    |       |       |       |       |       |       |       |       |       |       | 0.90  |       |       |       |       |       |       |       |      |       | 0.26 |      | 0.23  |       |       |       |       |       |
| 99  | cis-carveol                                    |       |       |       |       |       |       |       |       |       |       |       |       |       |       | 0.20  |       |       |       |      |       |      |      |       |       |       |       |       |       |
| 100 | benzaldehyde diethyl                           |       |       |       |       |       |       |       |       |       |       |       |       |       |       |       |       |       |       |      |       |      |      |       |       |       |       |       |       |
| 101 | 3-phenylpropanol                               |       |       |       |       |       |       |       |       |       |       |       |       |       |       |       |       |       |       |      |       | 0.11 |      |       |       |       |       |       |       |
| 102 | cis-3-hexenyl pentanoate                       |       |       |       | 0.03  |       |       |       |       |       |       |       |       |       |       |       |       |       |       |      |       |      |      |       |       |       |       |       |       |
| 103 | pulegone                                       | 0.14  |       | 0.35  | 0.40  |       |       |       |       |       | 0.07  |       |       | 0.08  | 0.05  | 0.22  |       |       |       |      |       |      |      |       |       |       | 0.06  |       |       |
| 104 | D-carvone                                      | 35.61 | 55.37 | 0.14  | 0.20  | 1.02  | 13.03 | 13.15 | 17.88 | 0.61  | 0.07  | 0.19  | 0.24  | 0.06  | 0.04  | 34.65 | 0.25  | 0.09  | 0.09  | 0.28 | 0.44  | 0.15 | 1.83 |       | 0.11  | 4.51  |       |       |       |
| 105 | ethyl 2-octenoate                              |       |       |       |       |       |       |       |       |       |       |       |       |       |       |       |       |       |       |      | 0.41  |      |      |       |       |       |       |       |       |
| 106 | linalyl acetate                                |       |       |       |       |       |       |       |       |       |       |       |       |       |       |       |       | 0.53  |       |      |       |      |      |       |       |       |       |       |       |
| 107 | 4-methoxy-benzaldehyde                         |       |       |       |       |       |       |       |       |       |       |       |       |       |       |       |       |       |       |      |       | 0.98 |      | 0.38  |       |       |       |       |       |
| 108 | piperitone                                     | 0.09  | 0.08  | 0.10  | 0.17  |       |       | 0.08  | 0.14  |       | 0.03  |       |       |       |       | 0.13  |       |       |       |      |       |      |      |       |       |       | 0.04  |       |       |
| 109 | 4-methyl-2-phenyl-1,3-dioxolane                |       |       |       |       |       |       |       |       |       |       |       |       |       |       |       |       |       |       |      | 0.67  |      |      |       |       |       |       |       |       |
| 110 | 2-hydroxy-3-isopropyl-6-methyl-2-cyclohexen-1- |       |       |       |       |       |       |       |       |       |       |       |       | 0.09  |       |       |       |       |       |      |       |      |      |       |       |       |       |       |       |
| 111 | citral                                         |       |       |       |       |       |       |       |       |       |       |       |       |       |       |       |       |       |       |      |       |      |      |       |       |       |       |       |       |
| 112 | cinnamaldehyde                                 |       |       |       |       |       |       |       |       |       |       |       |       |       |       |       |       |       |       |      |       | 0.14 |      |       |       |       |       |       |       |
| 113 | dodecane, 4,6-dimethyl                         |       |       |       |       |       | 0.28  | 0.18  |       |       |       |       |       |       |       |       |       |       |       |      | 0.07  | 0.14 | 0.10 |       | 0.05  | 0.06  | 0.19  | 0.15  |       |
| 114 | bornyl acetate                                 |       |       |       |       |       |       |       |       |       |       |       |       | 0.25  |       |       | 0.23  | 0.19  |       |      |       |      |      |       |       |       |       |       |       |
| 115 | anethole                                       |       |       |       |       |       |       |       |       |       |       |       |       |       |       |       |       |       |       |      |       |      |      |       |       |       |       |       |       |
| 116 | menthyl acetate                                | 2.58  |       | 4.51  | 3.92  | 0.28  | 0.18  | 0.17  | 0.24  |       | 2.58  |       |       | 2.41  | 2.17  | 1.60  |       |       |       | 0.07 | 0.04  |      |      | 0.09  | 0.07  |       | 0.54  |       |       |
| 117 | 2,4-dimethyl-1,3-dioxolane-2-propionate        |       |       |       |       |       |       |       |       |       |       |       |       |       |       |       |       |       |       |      | 0.24  |      |      |       |       |       |       |       |       |
| 118 | 2-hydroxypiperitone                            |       |       |       |       |       |       |       |       |       |       |       | 0.07  |       |       |       |       |       |       |      |       |      |      |       |       |       |       |       |       |
| 119 | α,α-dimethylphenethyl acetate                  |       |       |       |       |       |       |       |       |       |       |       |       |       |       |       |       |       |       |      |       | 0.21 |      |       |       |       |       |       |       |
| 120 | dihydrocarvyl acetate                          | 0.07  | 0.07  |       |       |       |       |       | 0.07  |       |       |       |       |       |       |       | 0.46  |       |       |      | 0.04  |      |      |       |       |       | 0.04  |       |       |
| 121 | piperonal                                      |       |       |       |       |       |       |       |       |       |       |       |       |       |       |       |       |       |       |      |       |      |      |       |       |       |       |       |       |
| 122 | δ-elemene                                      |       |       |       | 0.61  |       |       |       |       |       |       |       |       |       |       |       |       |       |       |      |       |      | 0.35 |       |       |       |       |       |       |
| 123 | butyl 2-ethyl hexanoate                        |       |       |       |       |       |       |       |       |       |       |       |       |       |       |       |       |       |       |      |       |      |      |       |       |       |       |       |       |
| 124 | nicotine                                       | 12.52 | 19.71 | 14.18 | 8.76  | 80.34 | 53.40 | 55.61 | 43.10 | 80.45 | 12.56 | 39.51 | 92.56 | 18.16 | 21.46 | 27.32 | 84.74 | 35.77 | 7.07  | 7.13 |       |      | 6.36 | 24.87 | 21.56 | 17.38 | 10.04 | 14.18 | 11.88 |
| 125 | eugenol                                        |       |       |       |       |       |       |       |       |       |       |       |       |       |       |       |       |       |       |      |       | 0.93 |      |       |       |       |       |       |       |
| 126 | nerol acetate                                  |       |       |       |       |       |       |       |       |       |       |       |       |       |       |       |       |       |       |      |       | 0.37 |      |       | 0.15  |       |       |       |       |
| 127 | trans-carveyl acetate                          | 0.05  | 0.02  |       |       |       |       |       |       |       |       |       |       |       |       |       |       |       |       |      |       | 0.11 |      |       |       |       |       |       |       |
| 128 | α-copaene                                      |       |       |       | 0.71  |       |       |       |       |       |       |       |       |       |       |       |       |       |       |      |       |      |      |       |       |       |       |       |       |
| 129 | cis-3-hexenyl hexanoate                        |       |       |       |       |       |       |       |       |       |       |       |       |       |       |       |       |       |       |      |       | 3.25 |      | 0.04  |       |       |       |       |       |
| 130 | β-damascenone                                  |       |       |       |       |       |       |       |       |       |       |       | 0.16  |       |       |       |       |       |       |      |       |      |      |       |       |       | 0.19  |       |       |
| 131 | hexyl hexanoate                                |       |       |       |       |       |       |       |       |       |       |       |       |       |       |       |       |       |       |      |       | 9.47 | 0.09 |       |       |       |       |       |       |
| 132 | methyl cinnamate                               |       |       |       |       |       |       |       |       |       |       |       |       |       |       | 0.11  |       |       |       |      |       |      |      | 2.19  |       |       |       |       |       |
| 133 | β-bourbonene                                   | 0.29  | 0.40  | 0.02  | 0.07  |       | 0.16  | 0.14  | 0.44  |       |       |       |       |       |       |       |       |       |       |      |       |      |      |       |       |       |       | 0.09  |       |
| 134 | β-elemene                                      |       |       |       | 0.19  |       |       |       |       |       |       |       |       |       |       |       |       |       |       |      |       |      |      |       |       |       |       | 0.02  |       |
| 135 | ethyl decanoate                                |       |       |       |       |       |       |       |       |       |       |       |       |       |       |       |       |       |       |      |       |      |      |       | 0.15  |       |       |       |       |

Figure S9: Relative areas normalized to 100% of individual chromatographic peaks based on the total area of identified chromatographic peaks for every NP (compound numbers 91–135).



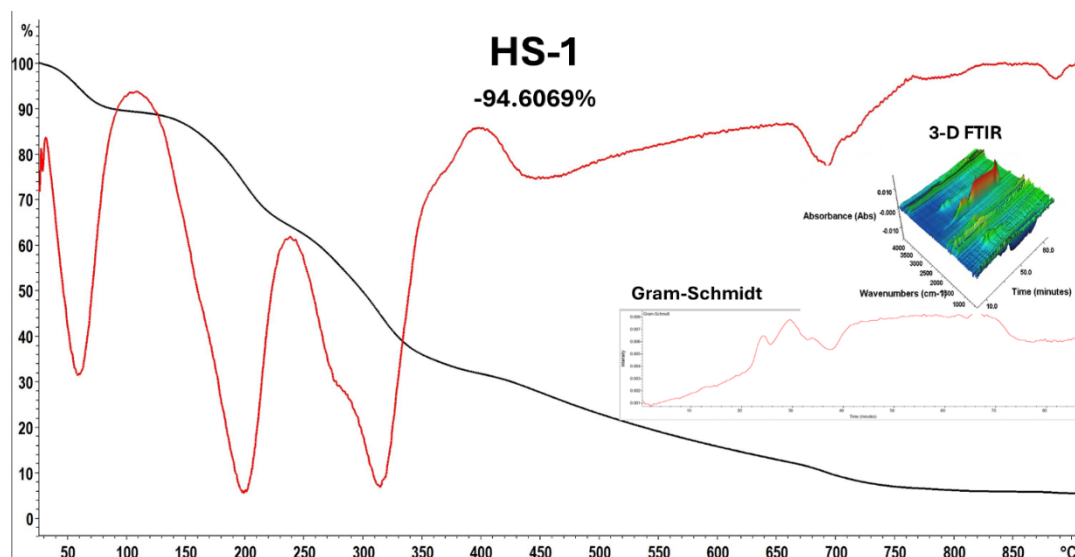

Figure S11: Thermogravimetric analysis (TGA) of HS-1, with the black curve representing mass loss, the red curve representing the derivative curve (DTG), the Gram-Schmidt curve, and 3-dimensional (3-D) FTIR.

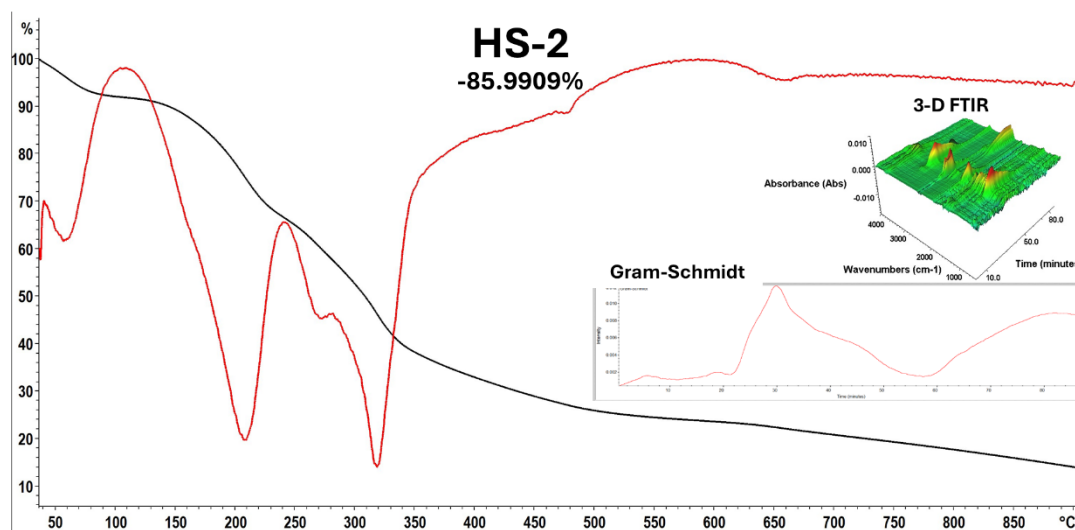

Figure S12: Thermogravimetric analysis (TGA) of HS-2, with the black curve representing mass loss, the red curve representing the derivative curve (DTG), the Gram-Schmidt curve, and 3-dimensional (3-D) FTIR.

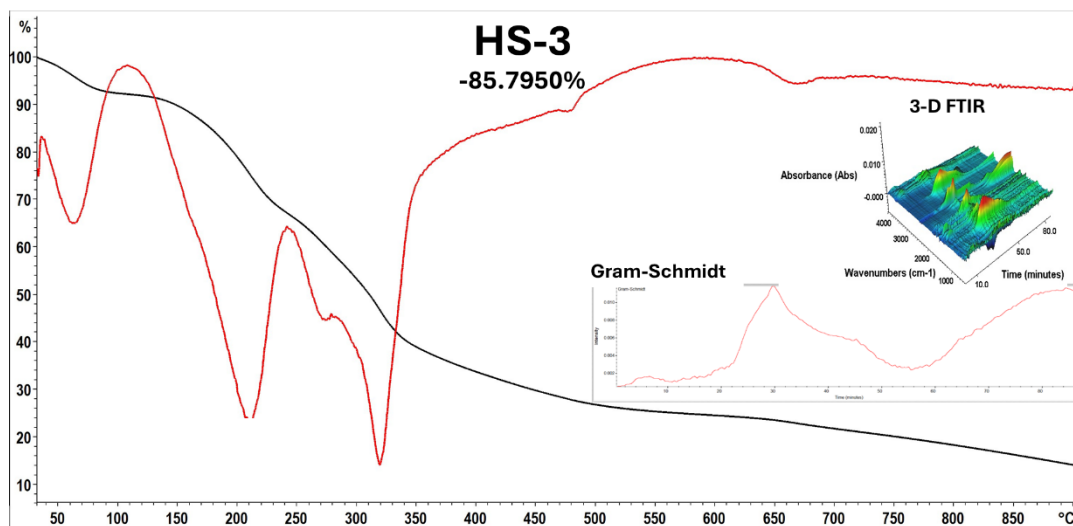

Figure S13: Thermogravimetric analysis (TGA) of HS-3, with the black curve representing mass loss, the red curve representing the derivative curve (DTG), the Gram-Schmidt curve, and 3-dimensional (3-D) FTIR.

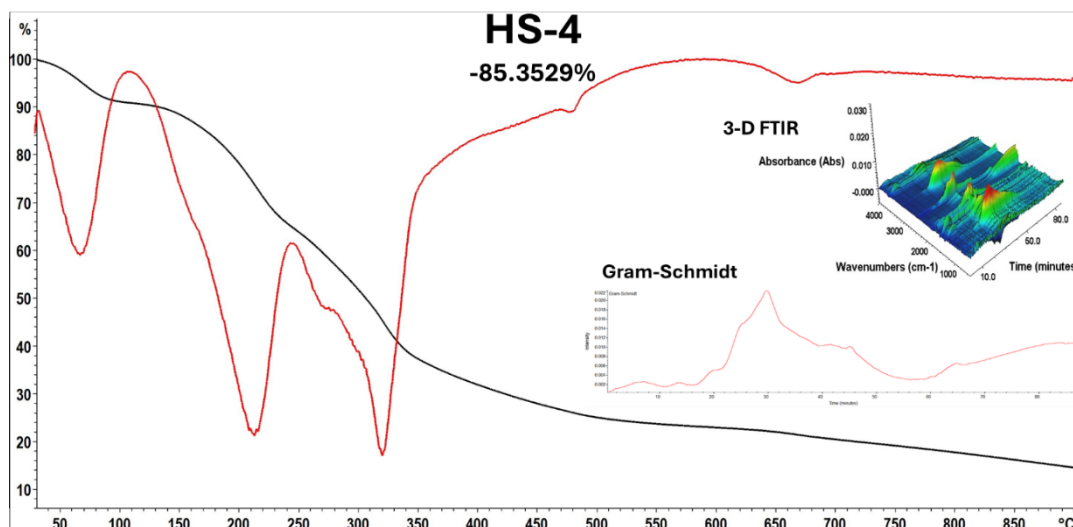

Figure S14: TGA of HS-4, with the black curve representing mass loss, the red curve representing the DTG, the Gram-Schmidt curve, and 3-D FTIR.

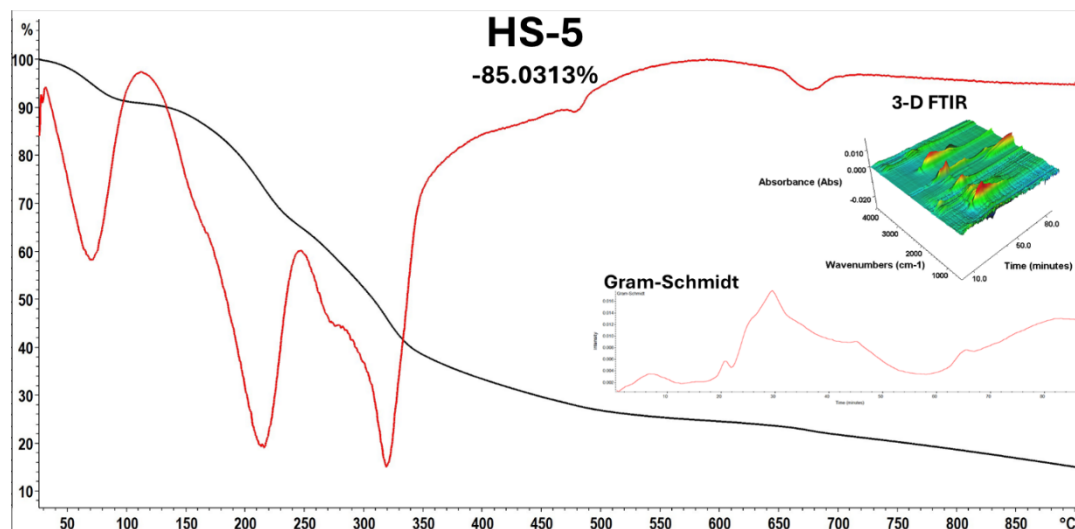

Figure S15: TGA of HS-5, with the black curve representing mass loss, the red curve representing the DTG, the Gram-Schmidt curve, and 3-D FTIR.

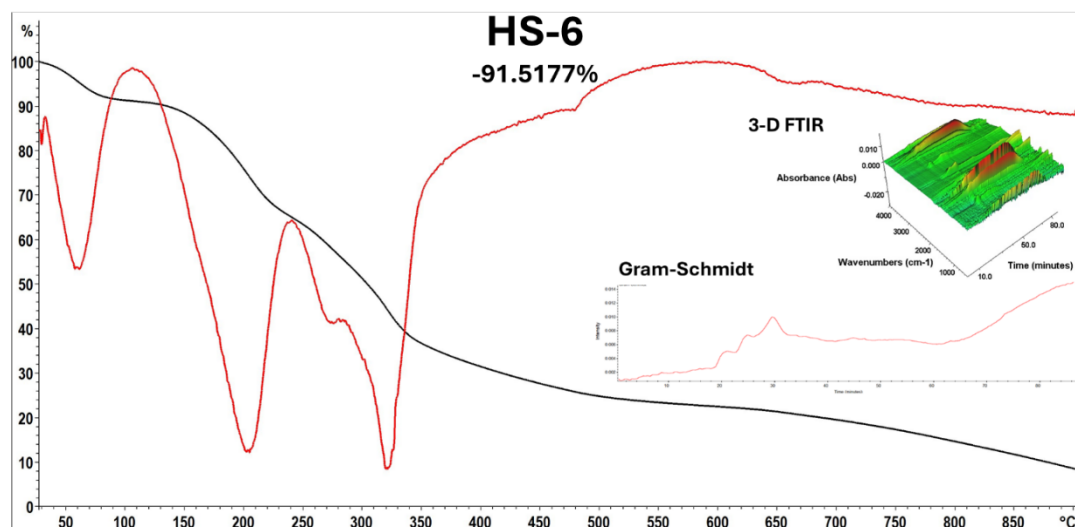

Figure S16: TGA of HS-6, with the black curve representing mass loss, the red curve representing the DTG, the Gram-Schmidt curve, and 3-D FTIR.

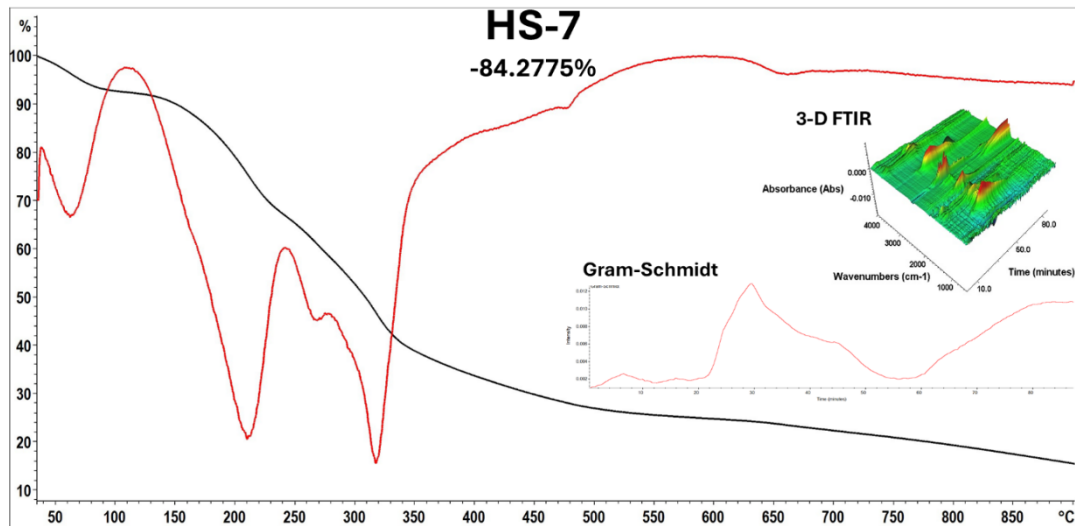

Figure S17: TGA of HS-7, with the black curve representing mass loss, the red curve representing the DTG, the Gram-Schmidt curve, and 3-D FTIR.

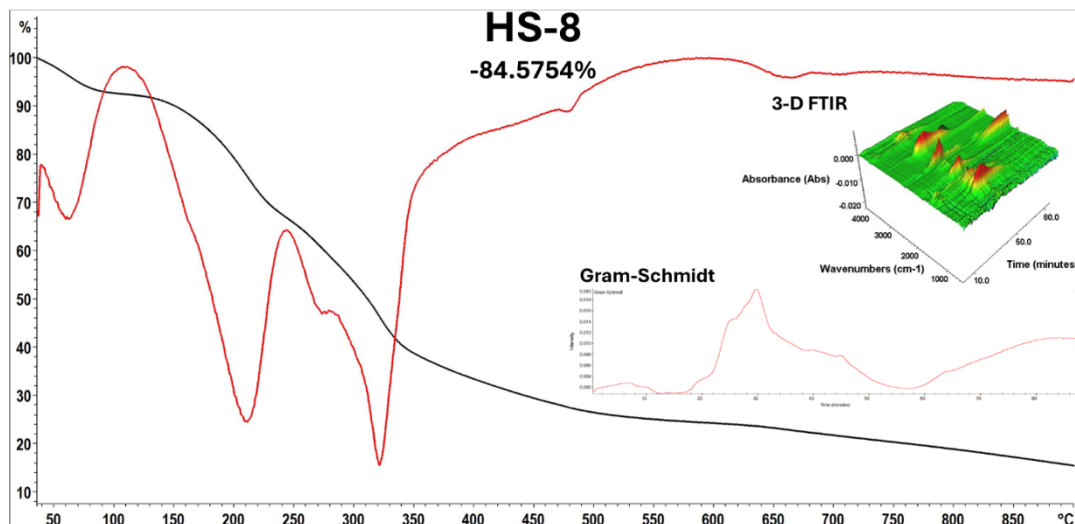

Figure S18: TGA of HS-8, with the black curve representing mass loss, the red curve representing the DTG, the Gram-Schmidt curve, and 3-D FTIR.

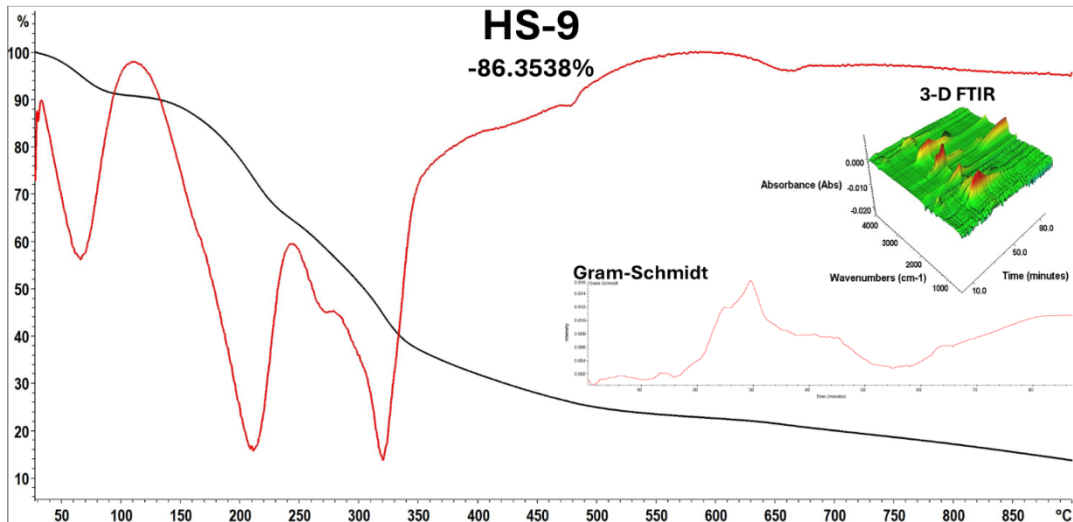

Figure S19: TGA of HS-9, with the black curve representing mass loss, the red curve representing the DTG, the Gram-Schmidt curve, and 3-D FTIR.

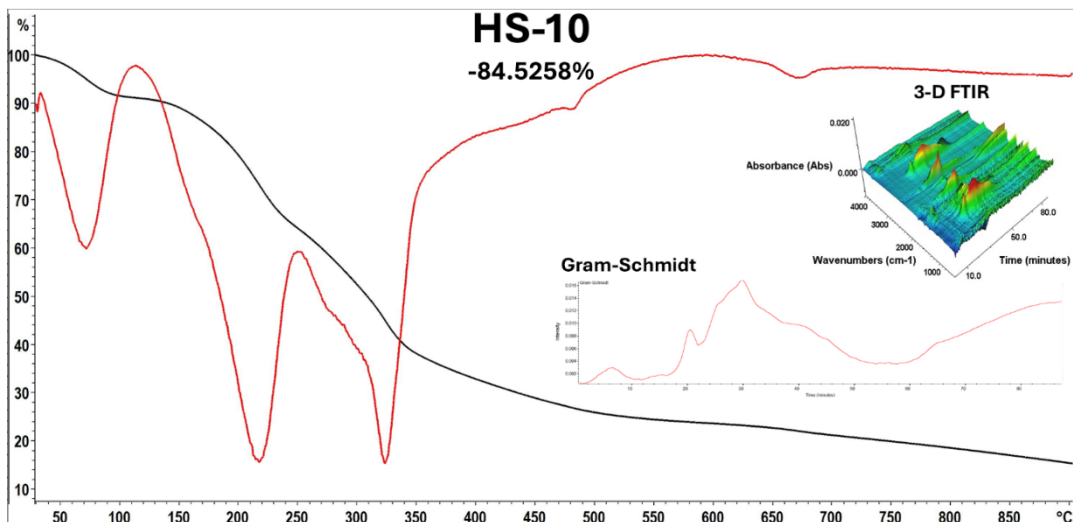

Figure S20: TGA of HS-10, with the black curve representing mass loss, the red curve representing the DTG, the Gram-Schmidt curve, and 3-D FTIR.

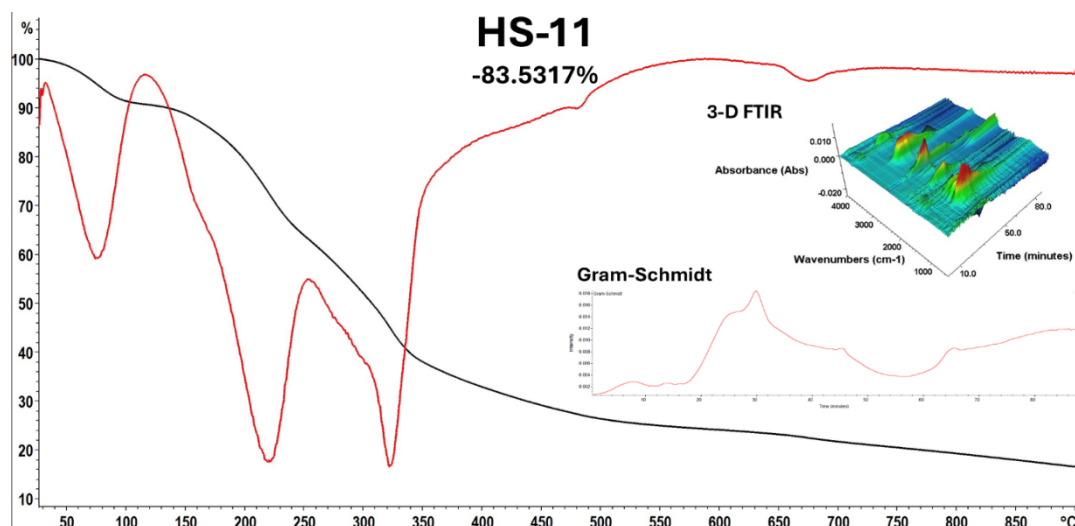

Figure S21: TGA of HS-11, with the black curve representing mass loss, the red curve representing the DTG, the Gram-Schmidt curve, and 3-D FTIR.

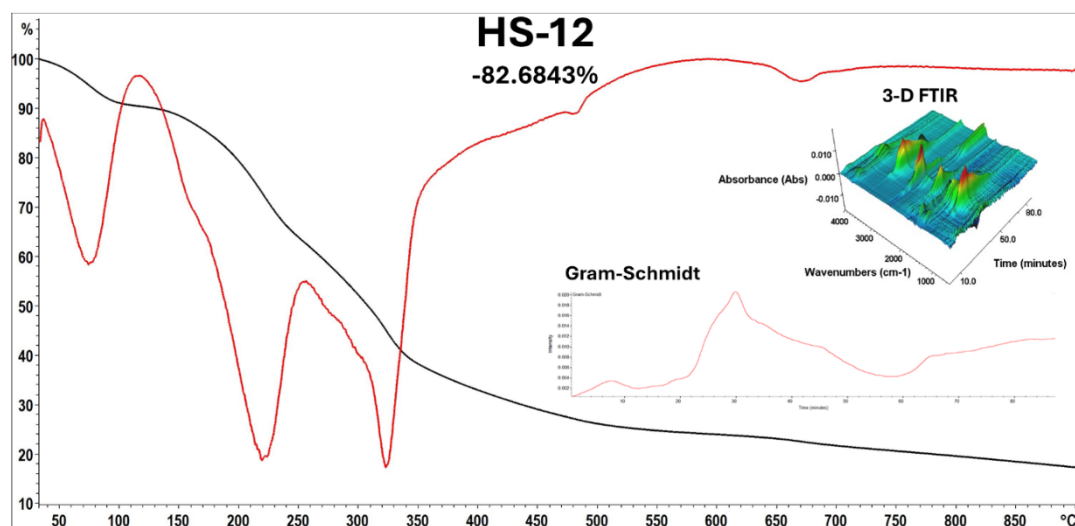

Figure S22: TGA of HS-12, with the black curve representing mass loss, the red curve representing the DTG, the Gram-Schmidt curve, and 3-D FTIR.

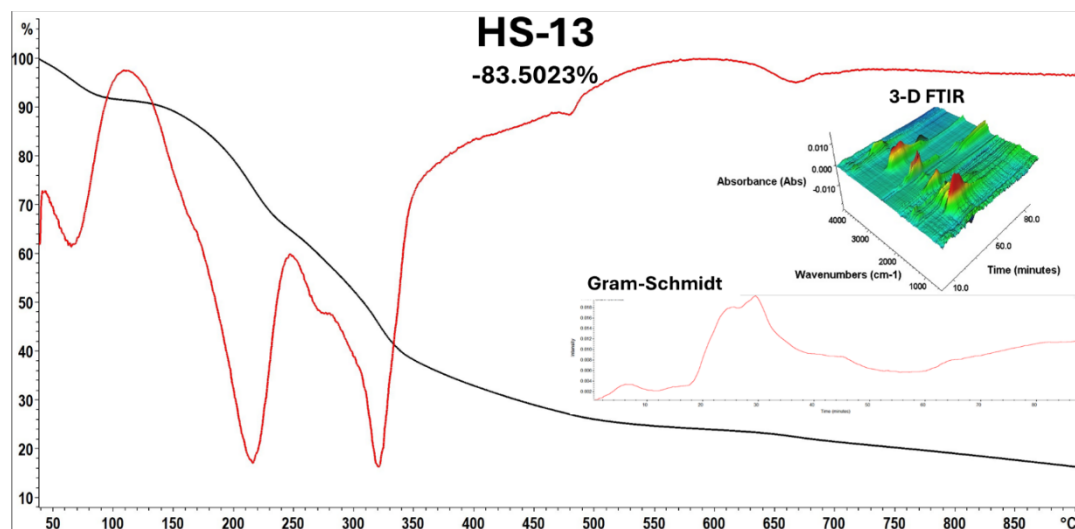

Figure S23: TGA of HS-13, with the black curve representing mass loss, the red curve representing the DTG, the Gram-Schmidt curve, and 3-D FTIR.

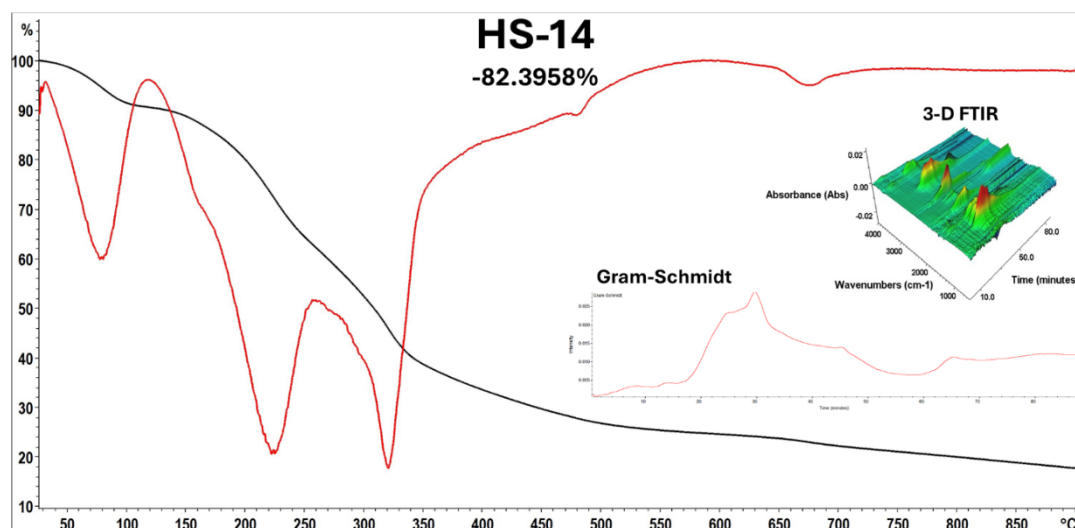

Figure S24: TGA of HS-14, with the black curve representing mass loss, the red curve representing the DTG, the Gram-Schmidt curve, and 3-D FTIR.

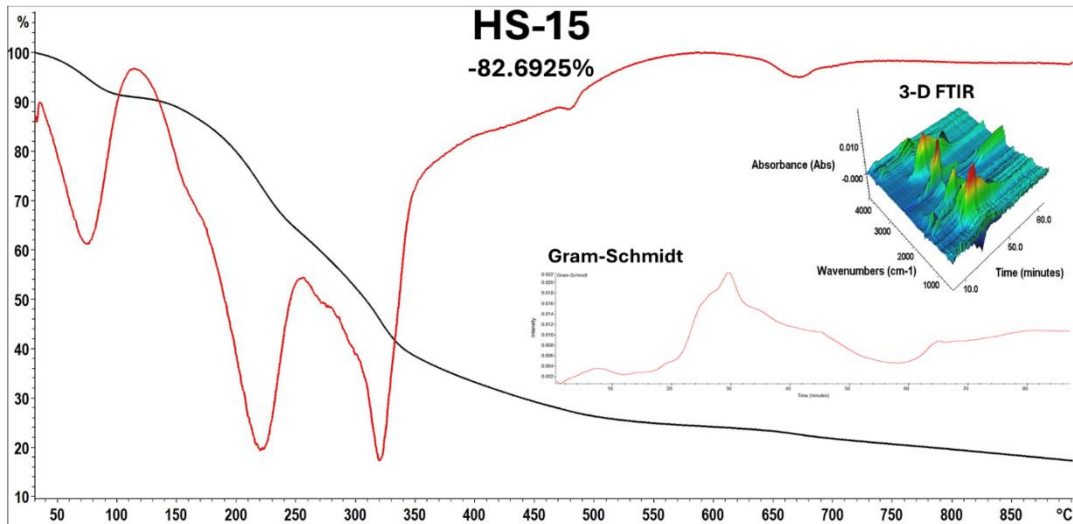

Figure S25: TGA of HS-15, with the black curve representing mass loss, the red curve representing the DTG, the Gram-Schmidt curve, and 3-D FTIR.

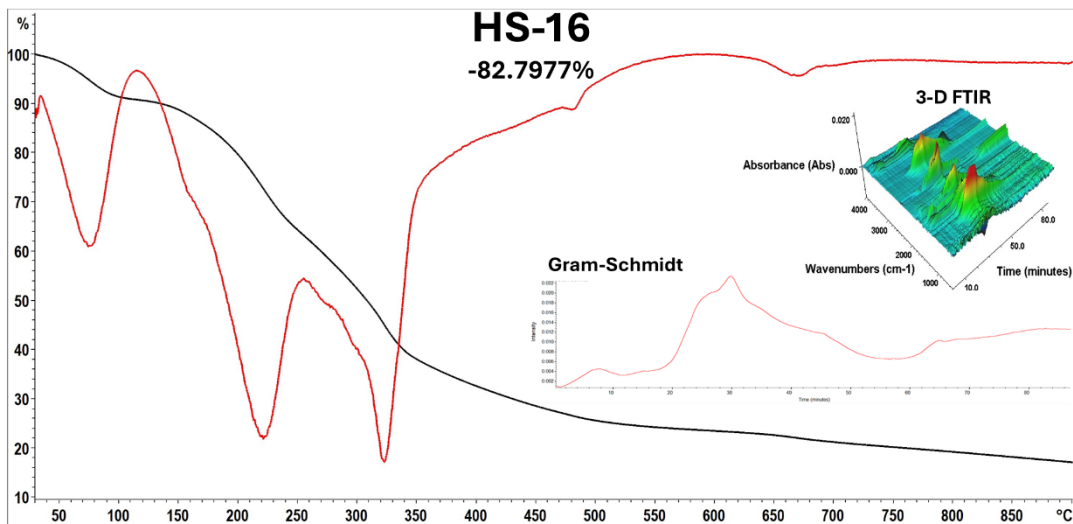

Figure S26: TGA of HS-16, with the black curve representing mass loss, the red curve representing the DTG, the Gram-Schmidt curve, and 3-D FTIR.

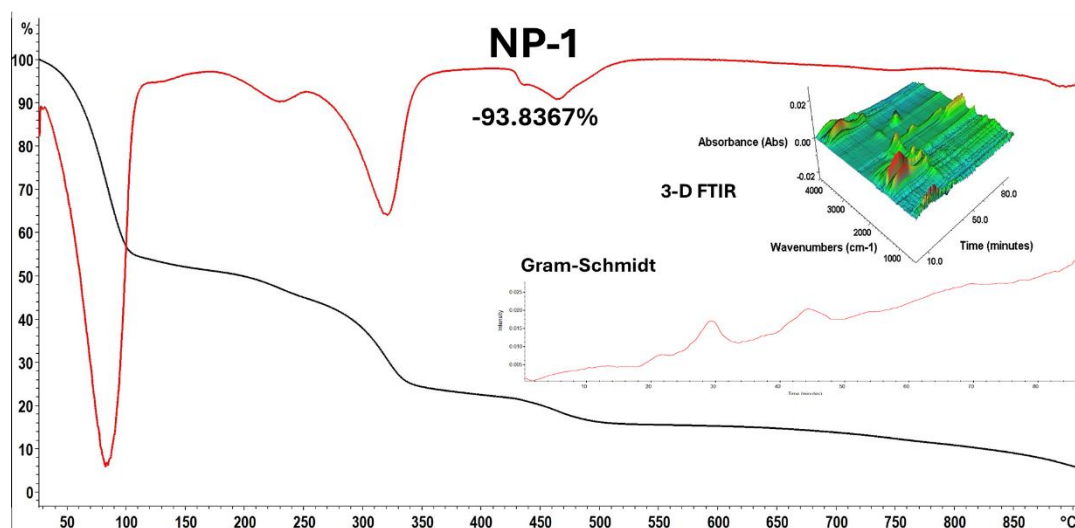

Figure S27: TGA of NP-1, with the black curve representing mass loss, the red curve representing the DTG, the Gram-Schmidt curve, and 3-D FTIR.

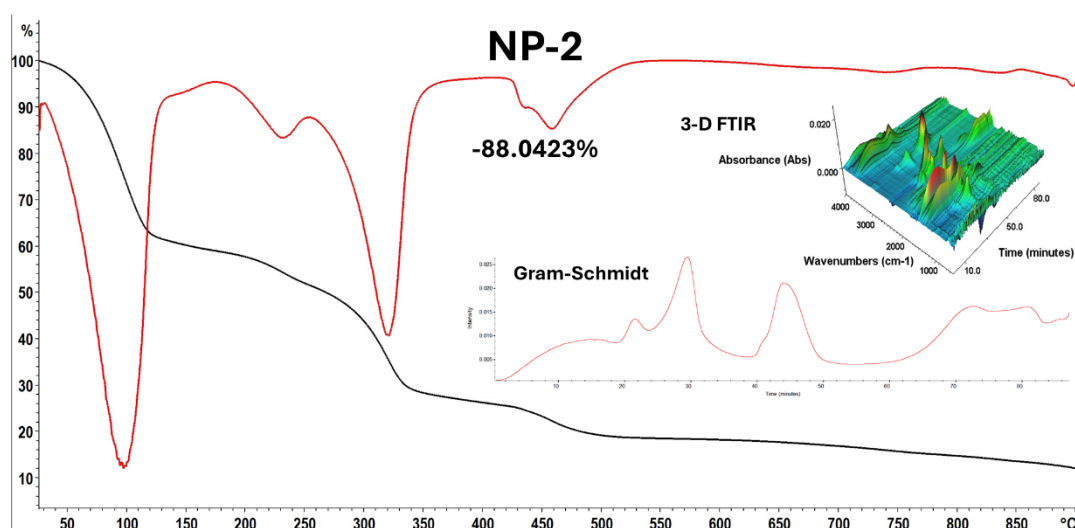

Figure S28: TGA of NP-2, with the black curve representing mass loss, the red curve representing the DTG, the Gram-Schmidt curve, and 3-D FTIR.

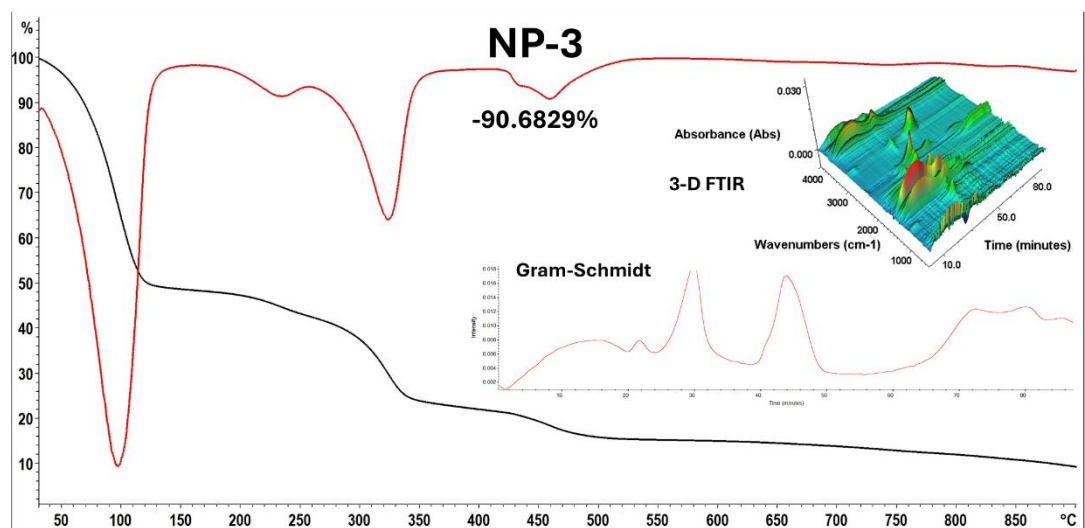

Figure S29: TGA of NP-3, with the black curve representing mass loss, the red curve representing the DTG, the Gram-Schmidt curve, and 3-D FTIR.

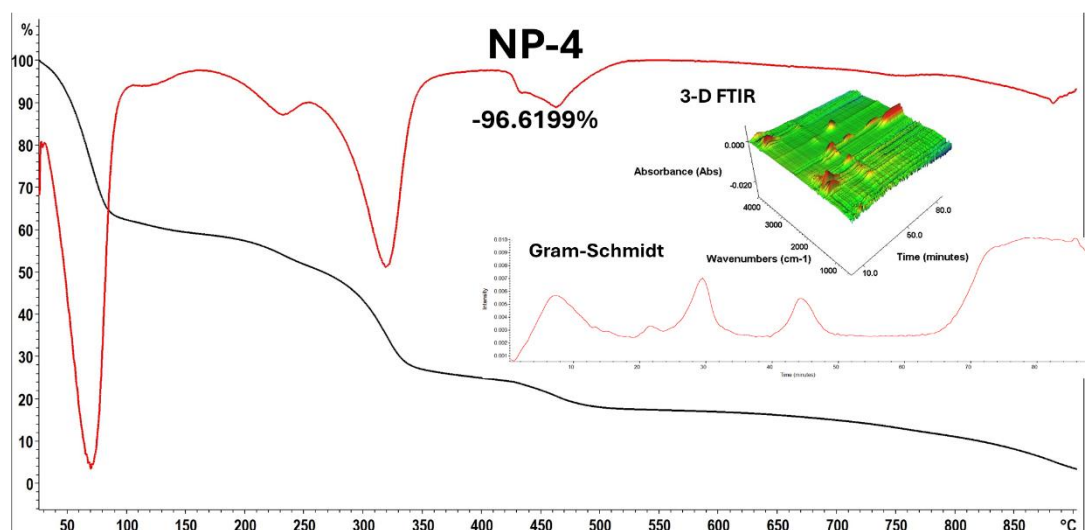

Figure S30: TGA of NP-4, with the black curve representing mass loss, the red curve representing the DTG, the Gram-Schmidt curve, and 3-D FTIR.

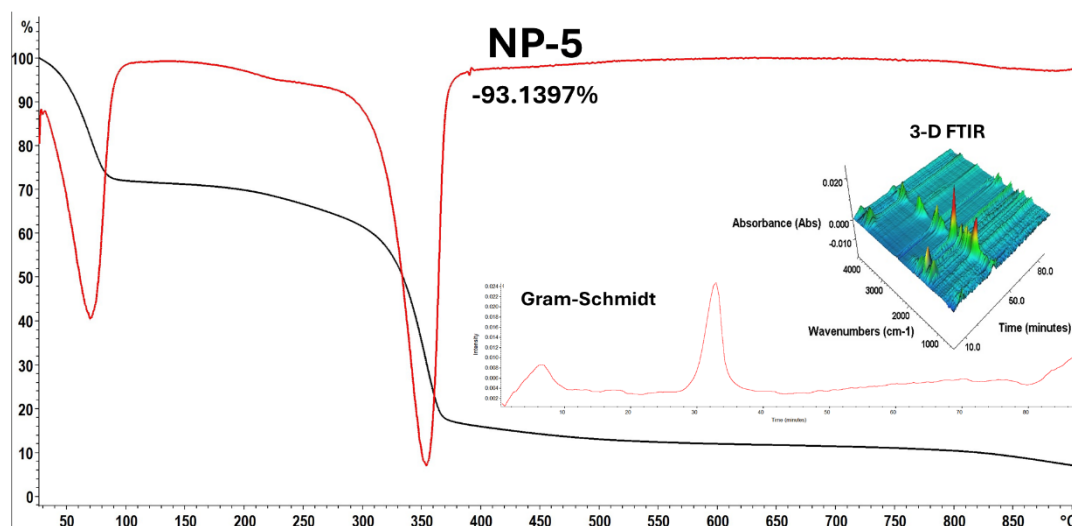

Figure S31: TGA of NP-5, with the black curve representing mass loss, the red curve representing the DTG, the Gram-Schmidt curve, and 3-D FTIR.

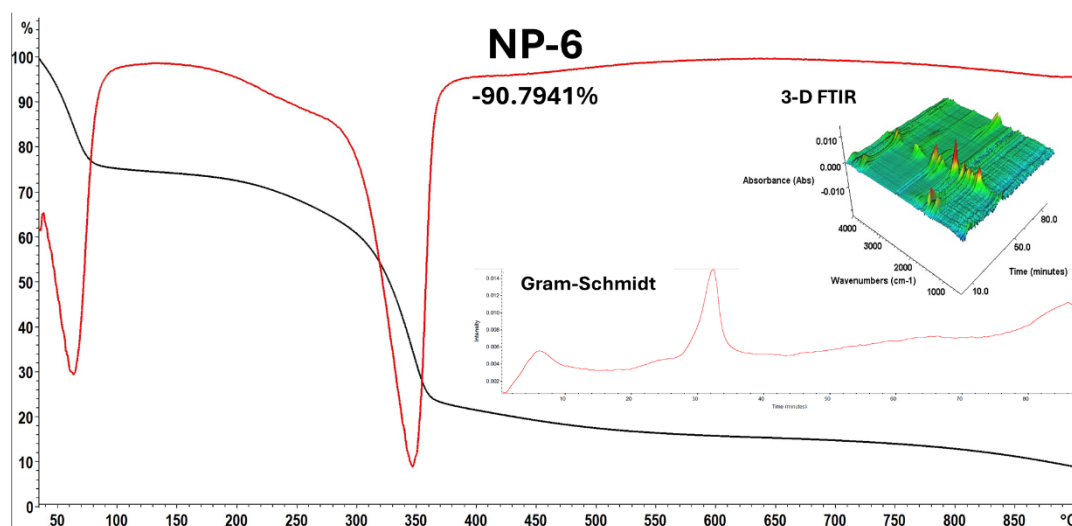

Figure S32: TGA of NP-6, with the black curve representing mass loss, the red curve representing the DTG, the Gram-Schmidt curve, and 3-D FTIR.

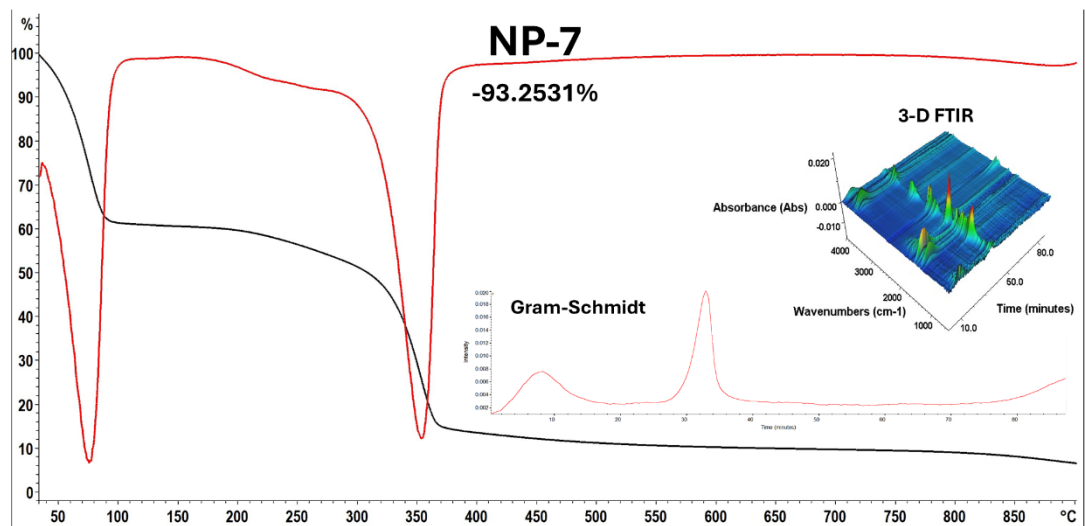

Figure S33: TGA of NP-7, with the black curve representing mass loss, the red curve representing the DTG, the Gram-Schmidt curve, and 3-D FTIR.

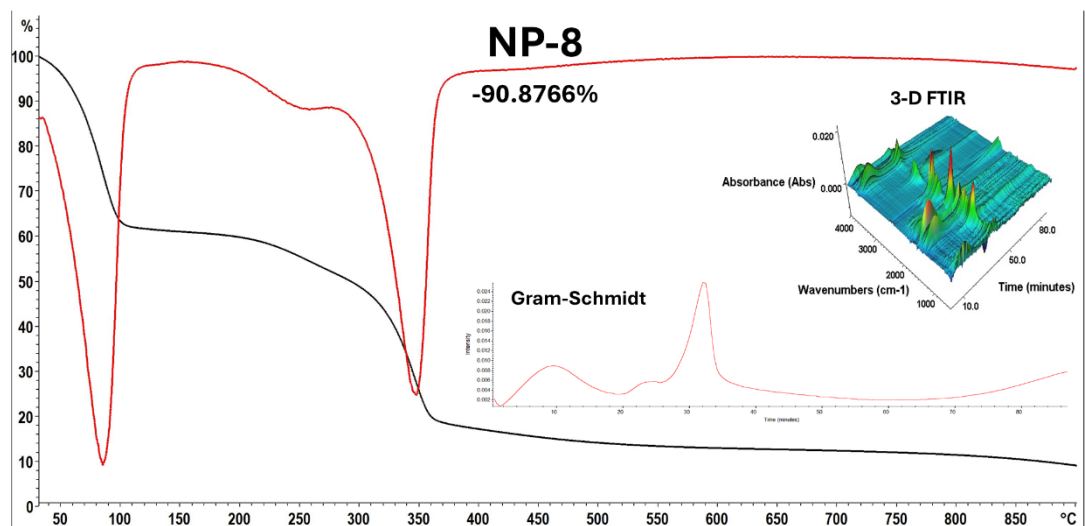

Figure S34: TGA of NP-8, with the black curve representing mass loss, the red curve representing the DTG, the Gram-Schmidt curve, and 3-D FTIR.

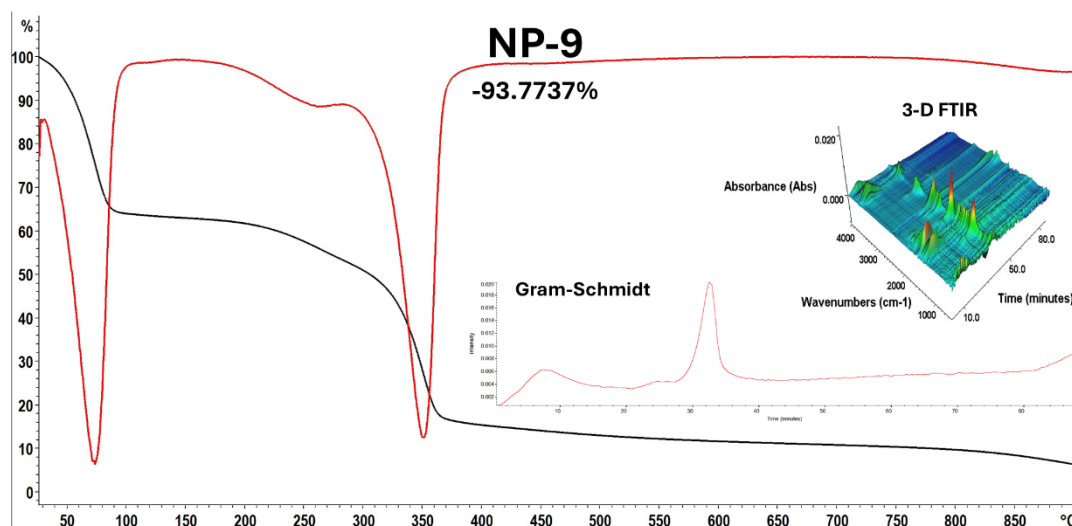

Figure S35: TGA of NP-9, with the black curve representing mass loss, the red curve representing the DTG, the Gram-Schmidt curve, and 3-D FTIR.

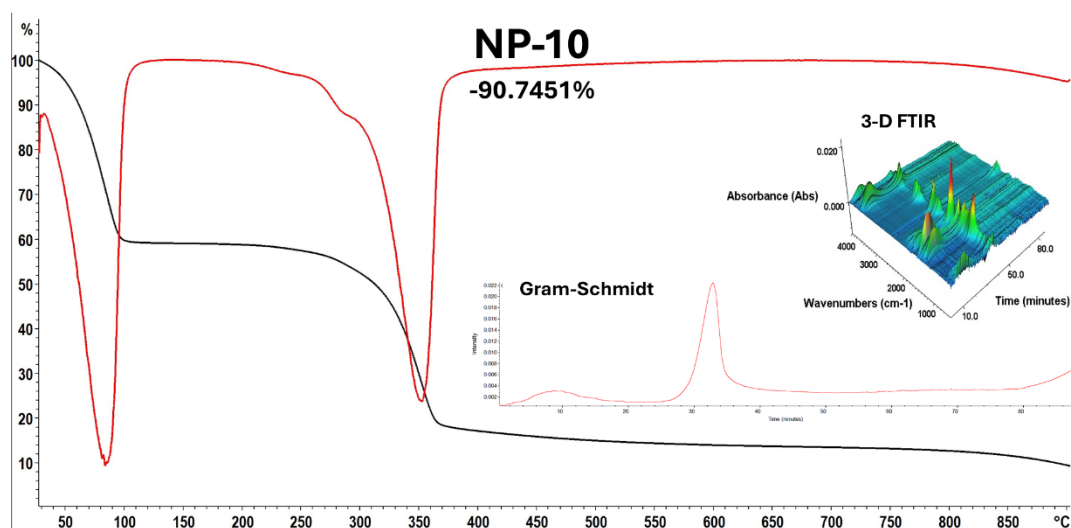

Figure S36: TGA of NP-10, with the black curve representing mass loss, the red curve representing the DTG, the Gram-Schmidt curve, and 3-D FTIR.

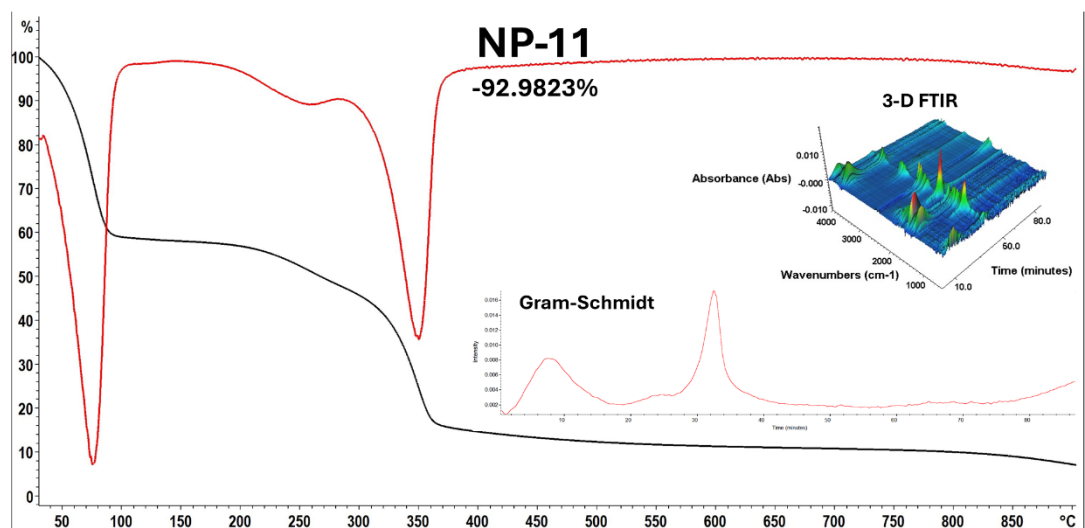

Figure S37: TGA of NP-11, with the black curve representing mass loss, the red curve representing the DTG, the Gram-Schmidt curve, and 3-D FTIR.

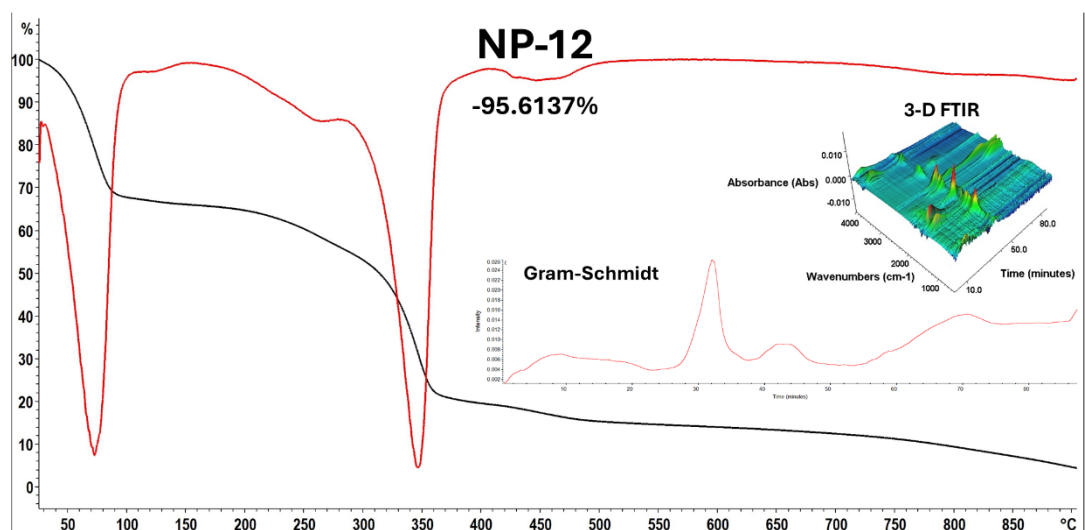

Figure S38: TGA of NP-12, with the black curve representing mass loss, the red curve representing the DTG, the Gram-Schmidt curve, and 3-D FTIR.

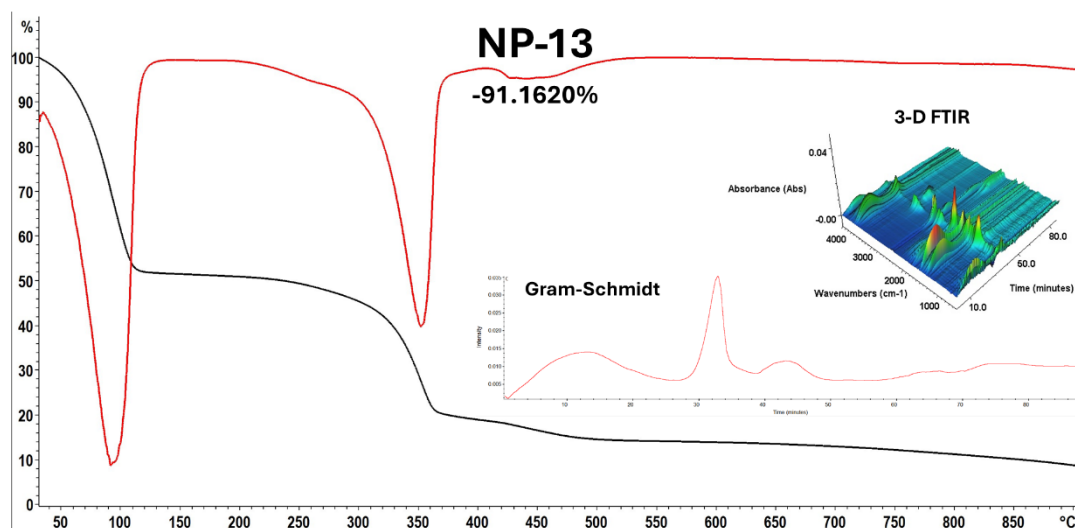

Figure S39: TGA of NP-13, with the black curve representing mass loss, the red curve representing the DTG, the Gram-Schmidt curve, and 3-D FTIR.

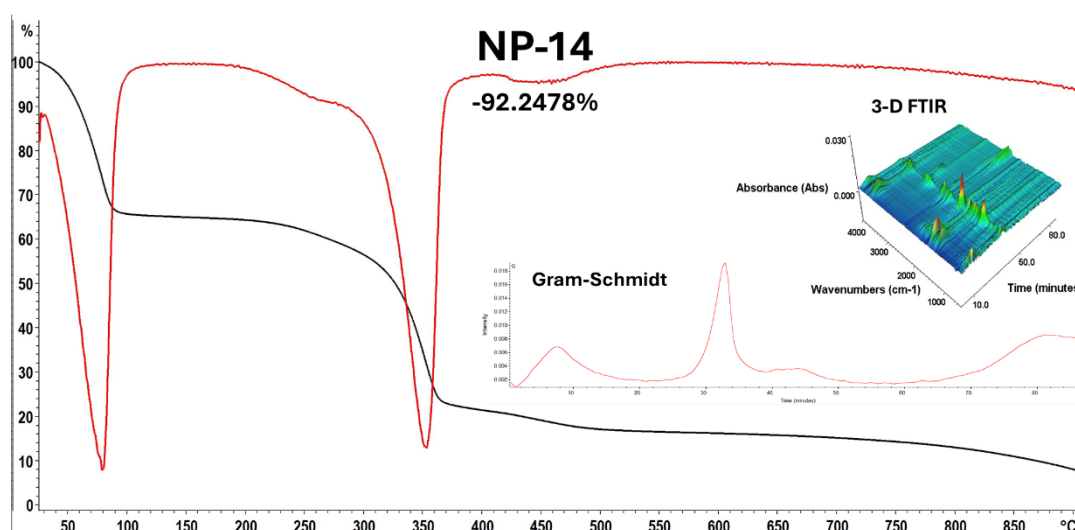

Figure S40: TGA of NP-14, with the black curve representing mass loss, the red curve representing the DTG, the Gram-Schmidt curve, and 3-D FTIR.

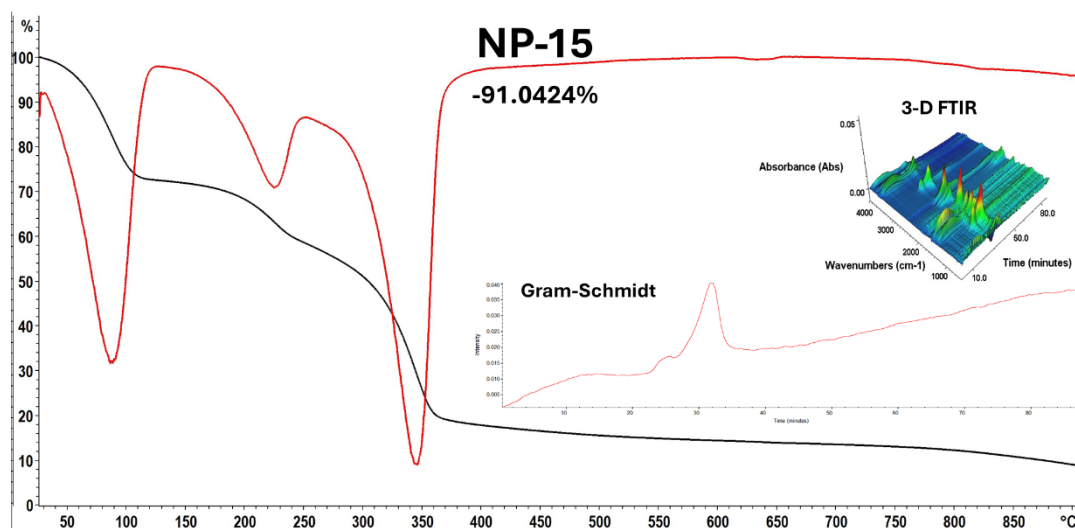

Figure S41: TGA of NP-15, with the black curve representing mass loss, the red curve representing the DTG, the Gram-Schmidt curve, and 3-D FTIR.

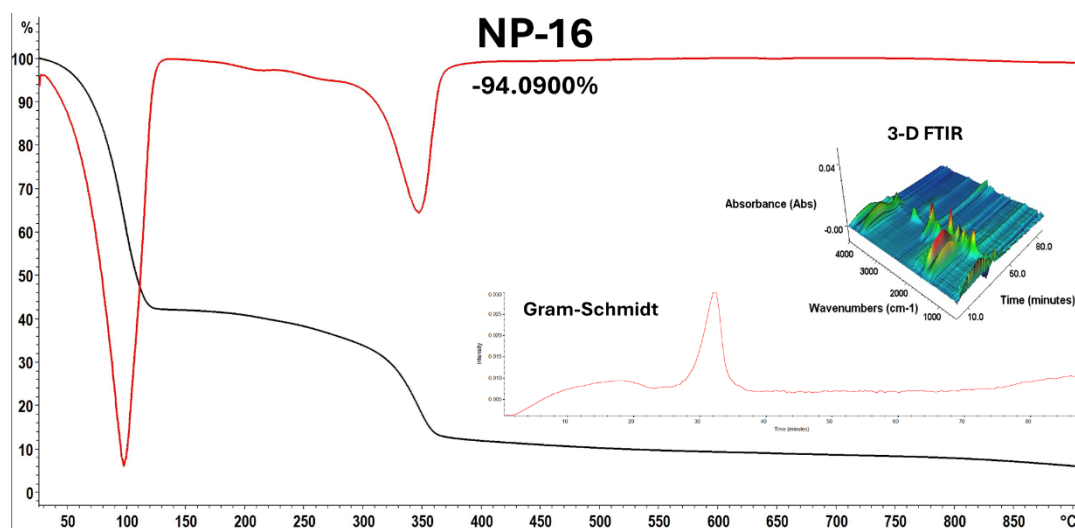

Figure S42: TGA of NP-16, with the black curve representing mass loss, the red curve representing the DTG, the Gram-Schmidt curve, and 3-D FTIR.

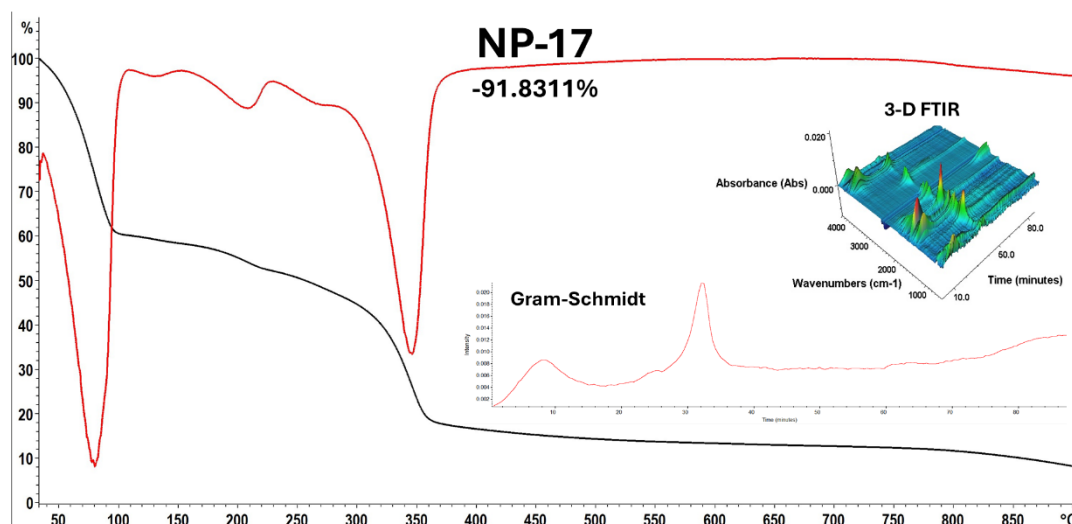

Figure S43: TGA of NP-17, with the black curve representing mass loss, the red curve representing the DTG, the Gram-Schmidt curve, and 3-D FTIR.

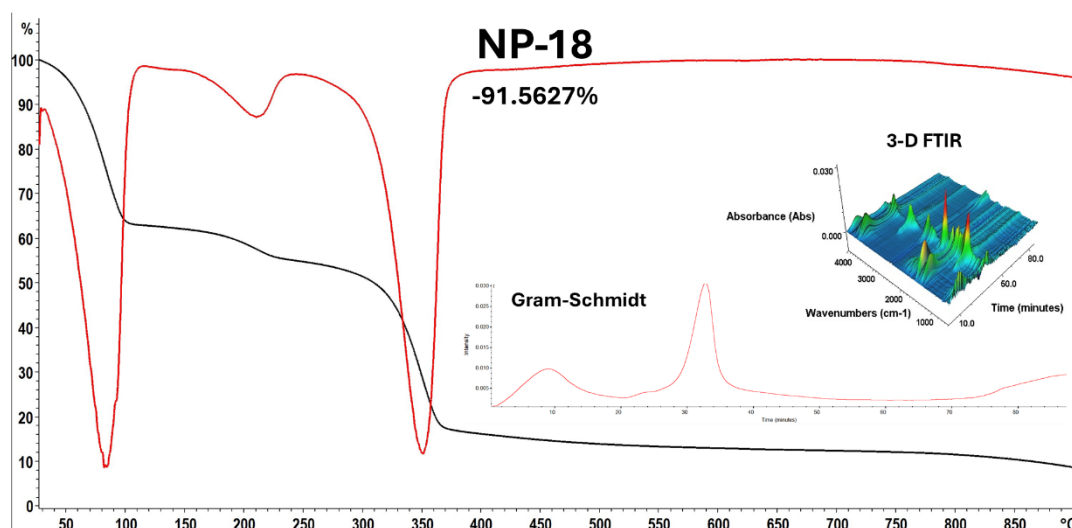

Figure S44: TGA of NP-18, with the black curve representing mass loss, the red curve representing the DTG, the Gram-Schmidt curve, and 3-D FTIR.

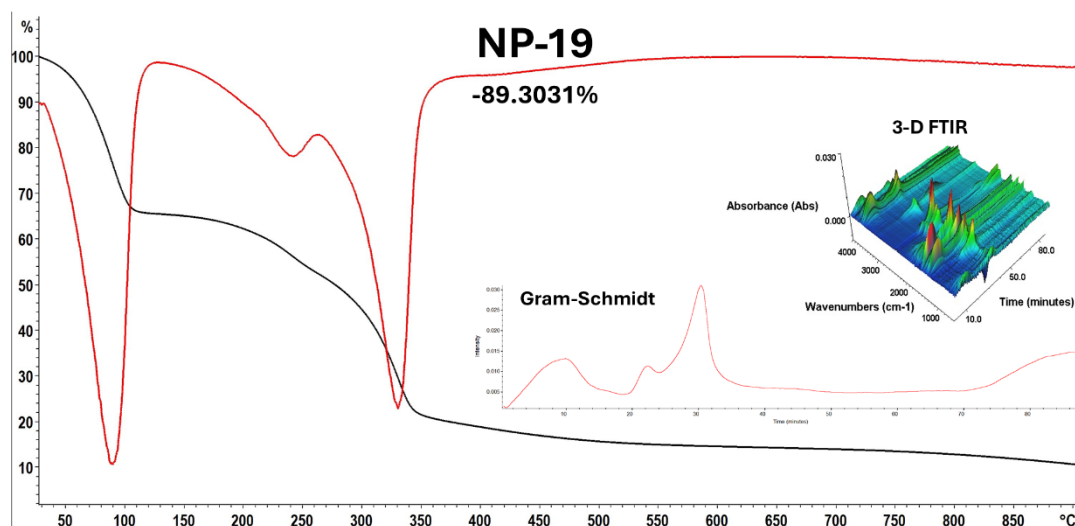

Figure S45: TGA of NP-19, with the black curve representing mass loss, the red curve representing the DTG, the Gram-Schmidt curve, and 3-D FTIR.

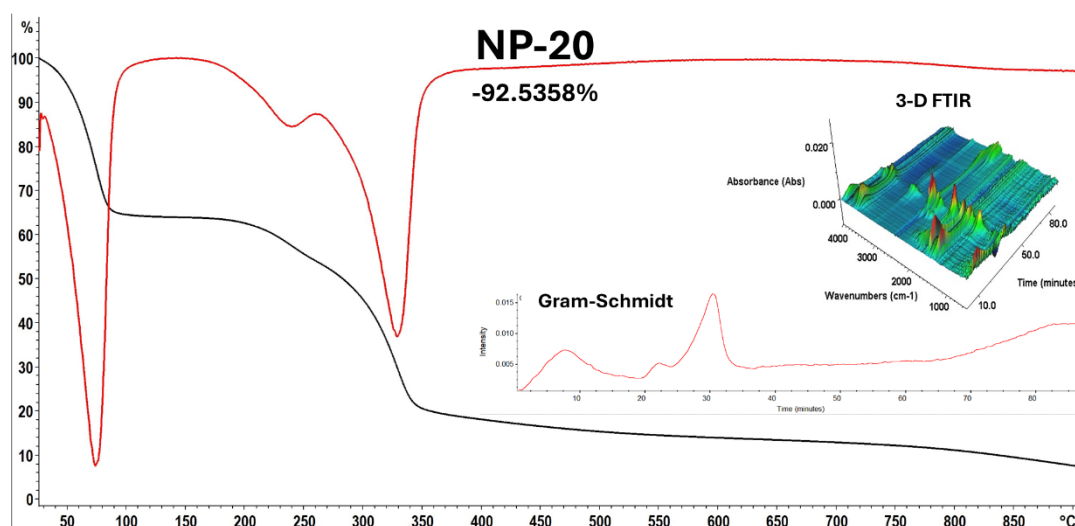

Figure S46: TGA of NP-20, with the black curve representing mass loss, the red curve representing the DTG, the Gram-Schmidt curve, and 3-D FTIR.

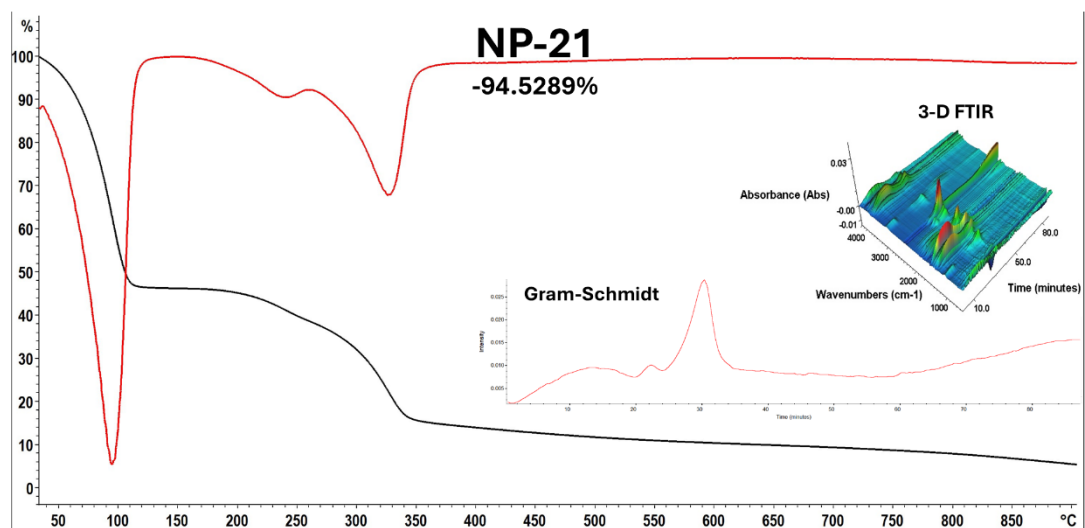

Figure S47: TGA of NP-21, with the black curve representing mass loss, the red curve representing the DTG, the Gram-Schmidt curve, and 3-D FTIR.

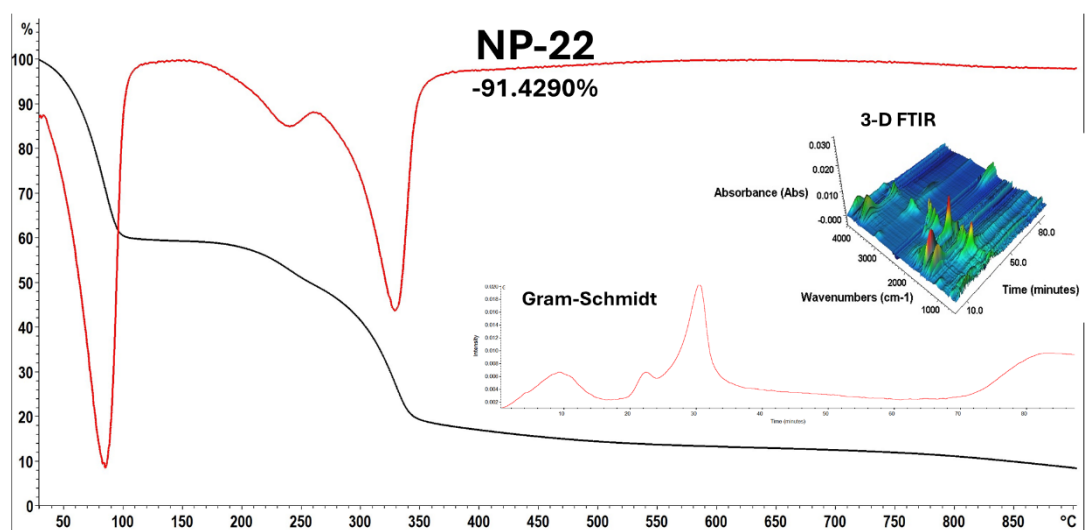

Figure S48: TGA of NP-22, with the black curve representing mass loss, the red curve representing the DTG, the Gram-Schmidt curve, and 3-D FTIR.

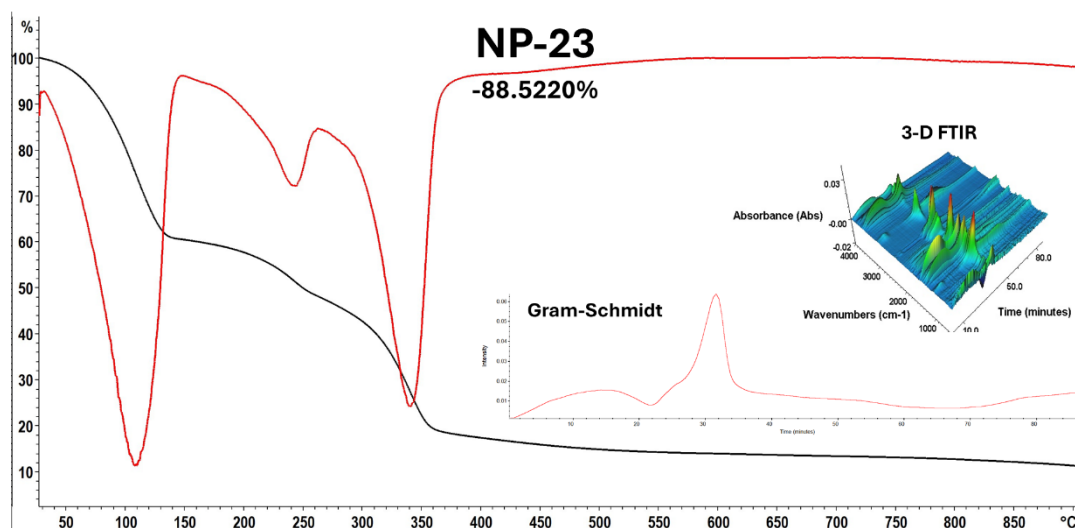

Figure S49: TGA of NP-23, with the black curve representing mass loss, the red curve representing the DTG, the Gram-Schmidt curve, and 3-D FTIR.

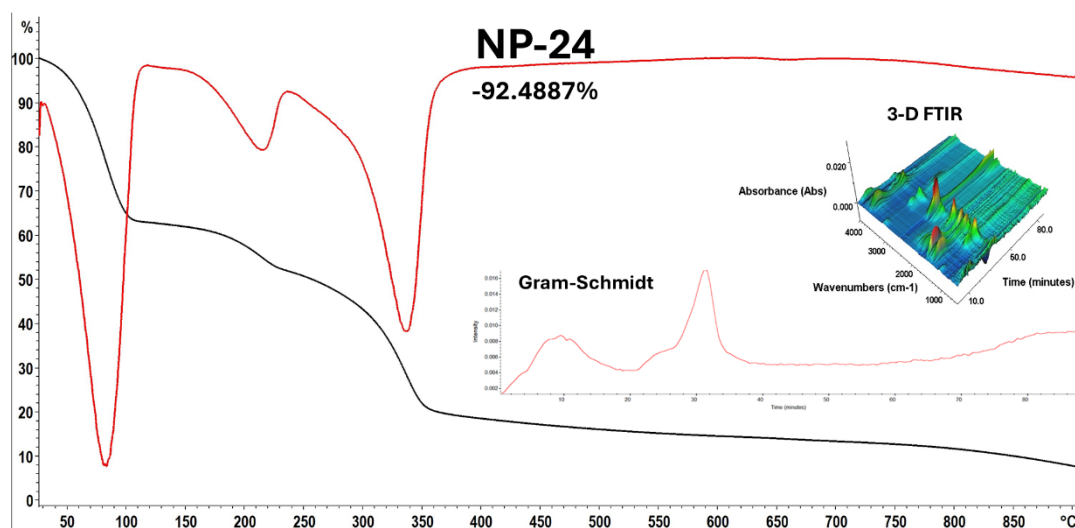

Figure S50: TGA of NP-24, with the black curve representing mass loss, the red curve representing the DTG, the Gram-Schmidt curve, and 3-D FTIR.

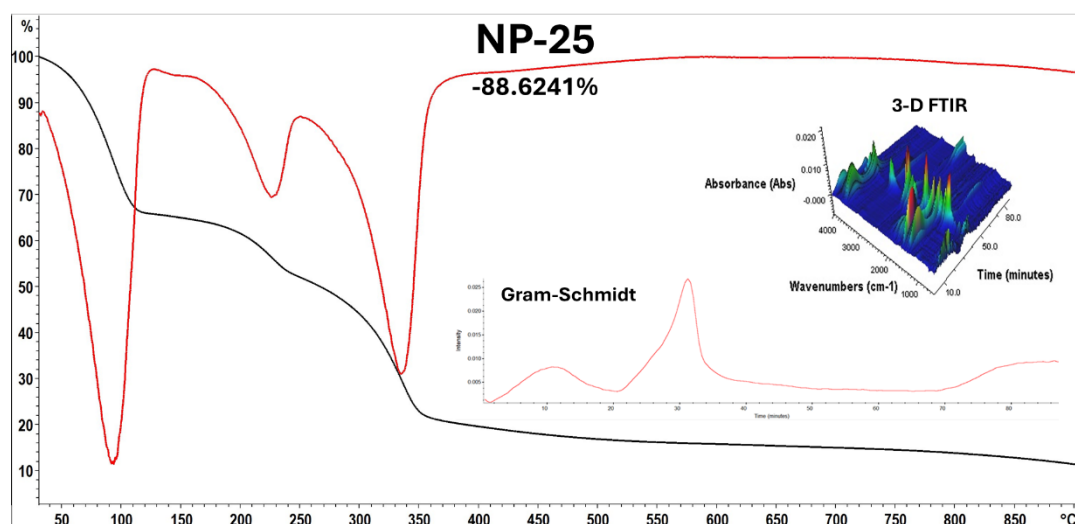

Figure S51: TGA of NP-25, with the black curve representing mass loss, the red curve representing the DTG, the Gram-Schmidt curve, and 3-D FTIR.

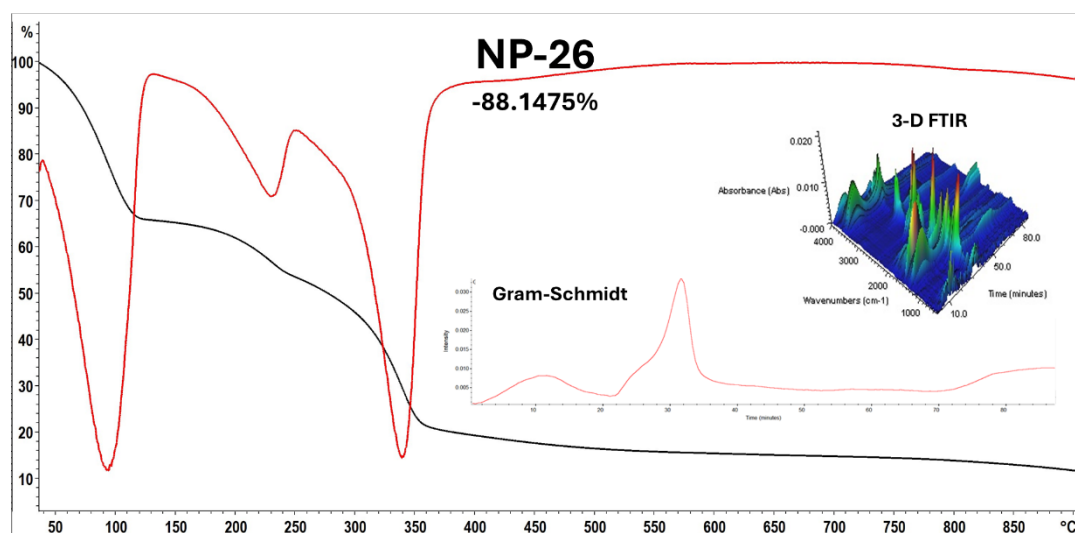

Figure S52: TGA of NP-26, with the black curve representing mass loss, the red curve representing the DTG, the Gram-Schmidt curve, and 3-D FTIR.
